# Supplementary material
Source: publisher figshare collection journal article supplement (https://tandf.figshare.com/ndownloader/files/40925607)
Supplement: Supplementary file 1 [file 40925607]

## Sheet: Sheet1
	Investigating the therapeutic potential of Trigonella foenum-graecum in bladder cancer treatment: A network pharmacology, molecular docking, and molecular dynamics study
	Said Bitam, Mabrouk Hamadache, Salah Hanini
	Supplementary files

## Sheet: S1
Sources	Name	Molecule	CaInactivenical SMILES	Formula	Hepatotoxicity	Carcinogenicity	Immunotoxicity	Mutagenicity	Cytotoxicity	MW	GI absorption	BBB permeant	Pgp substrate	Lipinski #violations	Ghose #violations	Veber #violations	Egan #violations	Muegge #violations	Bioavailability Score	PAINS #alerts	Brenk #alerts	Leadlikeness #violations
pubchem	Panasenoside	Molecule 1	OC[C@H]1O[C@@H](Oc2c(oc3c(c2=O)c(O)cc(c3)O)c2ccc(cc2)O)[C@@H]([C@H]([C@H]1O)O)O[C@@H]1O[C@H](CO)[C@H]([C@@H]([C@H]1O)O)O	C27H30O16						610.52	Low	No	Yes	3	4	1	1	4	0.17	0	0	1
pubchem	(1S,2S,4R,5'R,6R,7S,8R,9S,12S,13R,16S)-5',7,9,13-tetramethyl-16-spiro[5-oxapentacyclo[10.8.0.02,9.04,8.013,18]eicos-18-ene-6,2'-oxane]ol	Molecule 2	C[C@@H]1CC[C@@]2(OC1)O[C@H]1[C@H]([C@@H]2C)[C@@]2([C@@H](C1)[C@@H]1CC=C3[C@]([C@H]1CC2)(C)CC[C@@H](C3)O)C	C27H42O3						414.62	High	Yes	No	1	2	0	0	1	0.55	0	1	2
pubchem	Tigogenin	Molecule 3	C[C@@H]1CC[C@@]2(OC1)O[C@@H]1[C@H]([C@@H]2C)[C@@]2([C@@H](C1)[C@@H]1CC[C@@H]3[C@]([C@H]1CC2)(C)CC[C@@H](C3)O)C	C27H44O3						416.64	High	Yes	No	1	2	0	0	1	0.55	0	0	2
pubchem	Diosgenin	Molecule 4	C[C@@H]1CC[C@@]2(OC1)O[C@@H]1[C@H]([C@@H]2C)[C@@]2([C@@H](C1)[C@@H]1CC=C3[C@]([C@H]1CC2)(C)CC[C@@H](C3)O)C	C27H42O3						414.62	High	Yes	No	1	2	0	0	1	0.55	0	1	2
pubchem	(2S,3R,4S,5S,6R)-2-[[(2R,3S,4R,5R,6R)-4,5-dihydroxy-2-(hydroxymethyl)-6-[[(1R,2S,4S,5'R,6R,7S,8R,9S,12S,13S,16S,18S)-5',7,9,13-tetramethyl-16-spiro[5-oxapentacyclo[10.8.0.02,9.04,8.013,18]eicosane-6,2'-oxane]yl]oxy]-3-oxanyl]oxy]-6-(hydroxymethyl)oxane-3,4,5-triol	Molecule 5	OC[C@H]1O[C@@H](O[C@H]2CC[C@]3([C@H](C2)CC[C@@H]2[C@@H]3CC[C@]3([C@H]2C[C@H]2[C@@H]3[C@H](C)[C@]3(O2)CC[C@H](CO3)C)C)C)[C@@H]([C@H]([C@@H]1O[C@@H]1O[C@H](CO)[C@H]([C@@H]([C@H]1O)O)O)O)O	C39H64O13						740.92	Low	No	Yes	3	3	1	1	5	0.17	0	1	1
pubchem	(1R,4aS,8aS)-7-methyl-4-methylene-1-propan-2-yl-2,3,4a,5,6,8a-hexahydro-1H-naphthalene	Molecule 6	CC1=C[C@H]2[C@H](CC1)C(=C)CC[C@@H]2C(C)C	C15H24						204.35	Low	No	No	1	0	0	0	1	0.55	0	1	2
pubchem	(3S,8S,9S,10R,13R,14S,17R)-10,13-dimethyl-17-[(2R)-6-methyl-5-methyleneheptan-2-yl]-2,3,4,7,8,9,11,12,14,15,16,17-dodecahydro-1H-cyclopenta[a]phenanthren-3-ol	Molecule 7	O[C@H]1CC[C@]2(C(=CC[C@@H]3[C@@H]2CC[C@]2([C@H]3CC[C@@H]2[C@@H](CCC(=C)C(C)C)C)C)C1)C	C28H46O						398.66	Low	No	No	1	2	0	1	2	0.55	0	1	2
pubchem	Sarsasapogenin	Molecule 8	C[C@H]1CC[C@@]2(OC1)O[C@@H]1[C@H]([C@@H]2C)[C@@]2([C@@H](C1)[C@@H]1CC[C@H]3[C@]([C@H]1CC2)(C)CC[C@@H](C3)O)C	C27H44O3						416.64	High	Yes	No	1	2	0	0	1	0.55	0	0	2
pubchem	(1S,2S,4S,6R,7S,8R,9S,12S,13R,16S)-5',7,9,13,19-pentamethyl-16-spiro[5-oxapentacyclo[10.8.0.02,9.04,8.013,18]eicos-18-ene-6,2'-oxane]ol	Molecule 9	CC1CC[C@@]2(OC1)O[C@@H]1[C@H]([C@@H]2C)[C@@]2([C@@H](C1)[C@@H]1CC(=C3[C@]([C@H]1CC2)(C)CC[C@@H](C3)O)C)C	C28H44O3						428.65	High	No	No	1	2	0	1	1	0.55	0	1	2
pubchem	Smilagenin	Molecule 10	C[C@@H]1CC[C@@]2(OC1)O[C@@H]1[C@H]([C@@H]2C)[C@@]2([C@@H](C1)[C@@H]1CC[C@H]3[C@]([C@H]1CC2)(C)CC[C@@H](C3)O)C	C27H44O3						416.64	High	Yes	No	1	2	0	0	1	0.55	0	0	2
pubchem	3',5,7-trihydroxy-5'-methoxyisoflavone	Molecule 11	COc1cc(O)cc(c1)c1coc2c(c1=O)c(O)cc(c2)O	C16H12O6	Inactive	Inactive	Inactive	Inactive	Inactive	300.26	High	No	No	0	0	0	0	0	0.55	0	0	0
pubchem	(9R,10S,13R,14R,17R)-17-[(2R,5R)-5,6-dimethylheptan-2-yl]-10,13-dimethyl-2,3,4,5,6,9,11,12,14,15,16,17-dodecahydro-1H-cyclopenta[a]phenanthren-3-ol	Molecule 12	OC1CC[C@]2(C(C1)CC=C1[C@@H]2CC[C@]2([C@H]1CC[C@@H]2[C@@H](CC[C@H](C(C)C)C)C)C)C	C28H48O						400.68	Low	No	No	1	2	0	1	2	0.55	0	1	2
pubchem	(2,3,4,5,6-pentaphosphonooxycyclohexyl) dihydrogen phosphate	Molecule 13	OP(=O)(OC1C(OP(=O)(O)O)C(OP(=O)(O)O)C(C(C1OP(=O)(O)O)OP(=O)(O)O)OP(=O)(O)O)O	C6H18O24P6						660.04	Low	No	Yes	3	2	2	1	5	0.11	0	1	2
pubchem	17-(5-ethyl-6-methylheptan-2-yl)-10,13-dimethyl-2,3,4,7,8,9,11,12,14,15,16,17-dodecahydro-1H-cyclopenta[a]phenanthren-3-ol	Molecule 14	CCC(C(C)C)CCC(C1CCC2C1(C)CCC1C2CC=C2C1(C)CCC(C2)O)C	C29H50O						414.71	Low	No	No	1	3	0	1	2	0.55	0	1	2
pubchem	dodecane	Molecule 15	CCCCCCCCCCCC	C12H26						170.33	Low	No	No	1	0	0	0	3	0.55	0	0	3
pubchem	heptanal	Molecule 16	CCCCCCC=O	C7H14O						114.19	High	Yes	No	0	2	0	0	2	0.55	0	1	1
pubchem	1-hexanol	Molecule 17	CCCCCCO	C6H14O						102.17	High	Yes	No	0	2	0	0	2	0.55	0	0	1
pubchem	2-heptanone	Molecule 18	CCCCCC(=O)C	C7H14O						114.19	High	Yes	No	0	2	0	0	2	0.55	0	0	1
pubchem	2-hexylfuran	Molecule 19	CCCCCCc1ccco1	C10H16O						152.23	High	Yes	No	0	1	0	0	2	0.55	0	0	2
pubchem	3-(4-hydroxyphenyl)-2-propenoic acid [2-[5,7-dihydroxy-2-(4-hydroxyphenyl)-4-oxo-1-benzopyran-8-yl]-4,5-dihydroxy-6-(hydroxymethyl)-3-oxanyl] ester	Molecule 20	OCC1OC(C(C(C1O)O)OC(=O)C=Cc1ccc(cc1)O)c1c(O)cc(c2c1oc(cc2=O)c1ccc(cc1)O)O	C30H26O12						578.52	Low	No	No	3	2	1	1	3	0.17	0	1	1
pubchem	3-(4-hydroxy-3-methoxyphenyl)-2-propenoic acid	Molecule 21	COc1cc(C=CC(=O)O)ccc1O	C10H10O4						194.18	High	Yes	No	0	0	0	0	1	0.85	0	1	1
pubchem	4-Hydroxyisoleucine	Molecule 22	C[C@H]([C@@H]([C@@H](C(=O)[O-])[NH3+])C)O	C6H13NO3						147.17	Low	No	No	0	3	0	0	2	0.55	0	0	1
pubchem	Thymol	Molecule 23	Cc1ccc(c(c1)O)C(C)C	C10H14O						150.22	High	Yes	No	0	1	0	0	2	0.55	0	0	1
pubchem	(1S,2S,4R)-1-ethenyl-1-methyl-2,4-bis(1-methylethenyl)cyclohexane	Molecule 24	C=C[C@]1(C)CC[C@H](C[C@H]1C(=C)C)C(=C)C	C15H24						204.35	Low	No	No	1	0	0	0	2	0.55	0	1	2
pubchem	(E)-3-(3,4-dihydroxyphenyl)-2-propenoic acid	Molecule 25	OC(=O)/C=C/c1ccc(c(c1)O)O	C9H8O4						180.16	High	No	No	0	0	0	0	1	0.56	1	2	1
pubchem	(3S,5S,9R,10S,13R,14R,17R)-10,13-dimethyl-17-[(2R)-6-methylheptan-2-yl]-2,3,4,5,6,9,11,12,14,15,16,17-dodecahydro-1H-cyclopenta[a]phenanthren-3-ol	Molecule 26	CC(CCC[C@H]([C@H]1CC[C@@H]2[C@]1(C)CC[C@H]1C2=CC[C@@H]2[C@]1(C)CC[C@@H](C2)O)C)C	C27H46O						386.65	Low	No	No	1	2	0	1	2	0.55	0	1	2
pubchem	(2S,3R,4S,4aR,6aR,6bS,8aS,12aS,14aR,14bR)-2,3-dihydroxy-4,6a,6b,11,11,14b-hexamethyl-1,2,3,4a,5,6,7,8,9,10,12,12a,14,14a-tetradecahydropicene-4,8a-dicarboxylic acid	Molecule 27	O[C@H]1C[C@@]2(C)[C@H]([C@]([C@H]1O)(C)C(=O)O)CC[C@@]1([C@@H]2CC=C2[C@@]1(C)CC[C@@]1([C@H]2CC(C)(C)CC1)C(=O)O)C	C30H46O6						502.68	Low	No	Yes	1	3	0	0	1	0.56	0	1	2
pubchem	(E)-2-methyl-2-buten-1-ol	Molecule 28	C/C(=C\C)/CO	C5H10O						86.13	High	Yes	No	0	3	0	0	2	0.55	0	1	1
pubchem	(1S,4aR,8aR)-7-methyl-4-methylene-1-propan-2-yl-2,3,4a,5,6,8a-hexahydro-1H-naphthalene	Molecule 29	CC1=C[C@@H]2[C@@H](CC1)C(=C)CC[C@H]2C(C)C	C15H24						204.35	Low	No	No	1	0	0	0	1	0.55	0	1	2
pubchem	(1S,2S)-1-ethenyl-1-methyl-2-(1-methylethenyl)-4-propan-2-ylidenecyclohexane	Molecule 30	C=C[C@]1(C)CCC(=C(C)C)C[C@H]1C(=C)C	C15H24						204.35	Low	No	No	1	0	0	0	2	0.55	0	1	2
pubchem	(7aR)-4,4,7a-trimethyl-6,7-dihydro-5H-benzofuran-2-one	Molecule 31	O=C1C=C2[C@@](O1)(C)CCCC2(C)C	C11H16O2						180.24	High	Yes	No	0	0	0	0	1	0.55	0	0	1
pubchem	(1S,4S)-1,6-dimethyl-4-propan-2-yl-1,2,3,4-tetrahydronaphthalene	Molecule 32	CC([C@@H]1CC[C@@H](c2c1cc(C)cc2)C)C	C15H22						202.34	Low	No	No	1	0	0	0	2	0.55	0	0	2
pubchem	(E)-4-(2,6,6-trimethyl-1-cyclohexenyl)-3-buten-2-one	Molecule 33	CC(=O)/C=C/C1=C(C)CCCC1(C)C	C13H20O						192.3	High	Yes	No	0	0	0	0	2	0.55	0	1	1
pubchem	(E)-3-(3-hydroxyphenyl)-2-propenoic acid	Molecule 34	OC(=O)/C=C/c1cccc(c1)O	C9H8O3						164.16	High	Yes	No	0	0	0	0	1	0.85	0	1	1
pubchem	4-hydroxy-2,3-dimethyl-2H-furan-5-one	Molecule 35	CC1OC(=O)C(=C1C)O	C6H8O3						128.13	High	Yes	No	0	3	0	0	1	0.55	0	0	1
pubchem	1-pentanol	Molecule 36	CCCCCO	C5H12O						88.15	High	Yes	No	0	3	0	0	2	0.55	0	0	1
pubchem	hexanal	Molecule 37	CCCCCC=O	C6H12O						100.16	High	Yes	No	0	3	0	0	2	0.55	0	1	1
pubchem	aniline	Molecule 38	Nc1ccccc1	C6H7N						93.13	High	Yes	No	0	3	0	0	2	0.55	0	1	1
pubchem	Cholesterol	Molecule 39	CC(CCC[C@H]([C@H]1CC[C@@H]2[C@]1(C)CC[C@H]1[C@H]2CC=C2[C@]1(C)CC[C@@H](C2)O)C)C	C27H46O						386.65	Low	No	No	1	2	0	1	2	0.55	0	1	2
pubchem	(2R,3R,4S,5S,6R)-2-[[(2S,3S,4S,5R)-3,4-dihydroxy-2,5-bis(hydroxymethyl)-2-oxolanyl]oxy]-6-(hydroxymethyl)oxane-3,4,5-triol	Molecule 40	OC[C@H]1O[C@@]([C@H]([C@@H]1O)O)(CO)O[C@H]1O[C@H](CO)[C@H]([C@@H]([C@H]1O)O)O	C12H22O11						342.3	Low	No	Yes	2	1	1	1	4	0.17	0	0	0
pubchem	Trigonelline	Molecule 41	C[n+]1cccc(c1)C(=O)[O-]	C7H7NO2						137.14	High	No	No	0	4	0	0	1	0.55	0	1	1
pubchem	Ascorbic acid	Molecule 42	OC[C@@H]([C@H]1OC(=O)C(=C1O)O)O	C6H8O6						176.12	High	No	No	0	2	0	0	1	0.56	0	0	1
pubchem	5,7-dihydroxy-2-(4-hydroxyphenyl)-8-[3,4,5-trihydroxy-6-(hydroxymethyl)-2-oxanyl]-1-benzopyran-4-one	Molecule 43	OCC1OC(C(C(C1O)O)O)c1c(O)cc(c2c1oc(cc2=O)c1ccc(cc1)O)O	C21H20O10						432.38	Low	No	No	1	0	1	1	2	0.55	0	0	1
pubchem	7,4'-Dihydroxyflavone	Molecule 49	Oc1ccc(cc1)c1cc(=O)c2c(o1)cc(cc2)O	C15H10O4	Inactive	Inactive	Inactive	Inactive	Inactive	254.24	High	Yes	No	0	0	0	0	0	0.55	0	0	0
pubchem	1-ethenyl-1,2-dimethyl-2-(1-methylethenyl)-4-propan-2-ylidenecyclohexane	Molecule 45	C=CC1(C)CCC(=C(C)C)CC1(C)C(=C)C	C16H26						218.38	Low	No	No	1	0	0	0	2	0.55	0	1	2
pubchem	(9E,12E,15E)-octadeca-9,12,15-trienoic acid	Molecule 46	CC/C=C/C/C=C/C/C=C/CCCCCCCC(=O)O	C18H30O2						278.43	High	Yes	No	1	1	1	0	1	0.85	0	1	2
pubchem	2-(3,4-dihydroxyphenyl)-3,5-dihydroxy-7-[[(2S,3R,4S,5S,6R)-3,4,5-trihydroxy-6-(hydroxymethyl)-2-oxanyl]oxy]-1-benzopyran-4-one	Molecule 47	OC[C@H]1O[C@@H](Oc2cc(O)c3c(c2)oc(c(c3=O)O)c2ccc(c(c2)O)O)[C@@H]([C@H]([C@@H]1O)O)O	C21H20O12						464.38	Low	No	Yes	2	1	1	1	3	0.17	1	1	1
pubchem	5,7-dihydroxy-2-(4-hydroxyphenyl)-3-[[(2S,3R,4S,5S,6R)-3,4,5-trihydroxy-6-(hydroxymethyl)-2-oxanyl]oxy]-1-benzopyran-4-one	Molecule 48	OC[C@H]1O[C@@H](Oc2c(oc3c(c2=O)c(O)cc(c3)O)c2ccc(cc2)O)[C@@H]([C@H]([C@@H]1O)O)O	C21H20O11						448.38	Low	No	No	2	0	1	1	3	0.17	0	0	1
pubchem	Daidzein	Molecule 52	Oc1ccc(cc1)c1coc2c(c1=O)ccc(c2)O	C15H10O4	Inactive	Inactive	Inactive	Inactive	Inactive	254.24	High	Yes	No	0	0	0	0	0	0.55	0	0	0
pubchem	Kaempferol	Molecule 55	Oc1ccc(cc1)c1oc2cc(O)cc(c2c(=O)c1O)O	C15H10O6	Inactive	Inactive	Inactive	Inactive	Inactive	286.24	High	No	No	0	0	0	0	0	0.55	0	0	0
TCMSP	tricin	Molecule 227	COc1cc(cc(c1O)OC)c1cc(=O)c2c(o1)cc(cc2O)O	C17H14O7	Inactive	Inactive	Inactive	Inactive	Inactive	330.29	High	No	No	0	0	0	0	0	0.55	0	0	0
TCMSP	olmelin	Molecule 241	COc1ccc(cc1)c1coc2c(c1=O)c(O)cc(c2)O	C16H12O5	Inactive	Inactive	Inactive	Inactive	Inactive	284.26	High	No	No	0	0	0	0	0	0.55	0	0	0
pubchem	(3S,8S,9S,10R,13R,14S,17R)-10,13-dimethyl-17-[(E,2R)-5-propan-2-ylhept-5-en-2-yl]-2,3,4,7,8,9,11,12,14,15,16,17-dodecahydro-1H-cyclopenta[a]phenanthren-3-ol	Molecule 53	C/C=C(/C(C)C)\CC[C@H]([C@H]1CC[C@@H]2[C@]1(C)CC[C@H]1[C@H]2CC=C2[C@]1(C)CC[C@@H](C2)O)C	C29H48O						412.69	Low	No	No	1	3	0	1	2	0.55	0	1	2
pubchem	Linolenic acid	Molecule 54	CC/C=C\C/C=C\C/C=C\CCCCCCCC(=O)O	C18H30O2						278.43	Low	No	No	1	3	0	1	2	0.55	0	1	2
TCMSP	5,7,3'-Trihydroxy-5'-methylisoflavone	Molecule 247	Cc1cc(O)cc(c1)c1coc2c(c1=O)c(O)cc(c2)O	C16H12O5	Inactive	Inactive	Inactive	Inactive	Inactive	284.26	High	No	No	0	0	0	0	0	0.55	0	0	0
pubchem	2-(3,4-dihydroxyphenyl)-5,7-dihydroxy-3-[[(2S,3R,4S,5S,6R)-3,4,5-trihydroxy-6-[[(2R,3R,4R,5R,6S)-3,4,5-trihydroxy-6-methyl-2-oxanyl]oxymethyl]-2-oxanyl]oxy]-1-benzopyran-4-one	Molecule 56	Oc1cc(O)c2c(c1)oc(c(c2=O)O[C@@H]1O[C@H](CO[C@@H]2O[C@@H](C)[C@@H]([C@H]([C@H]2O)O)O)[C@H]([C@@H]([C@H]1O)O)O)c1ccc(c(c1)O)O	C27H30O16						610.52	Low	No	Yes	3	4	1	1	4	0.17	1	1	1
pubchem	(3S,8S,9S,10R,13R,14S,17R)-17-[(E,2R,5S)-5-ethyl-6-methylhept-3-en-2-yl]-10,13-dimethyl-2,3,4,7,8,9,11,12,14,15,16,17-dodecahydro-1H-cyclopenta[a]phenanthren-3-ol	Molecule 57	CC[C@@H](C(C)C)/C=C/[C@H]([C@H]1CC[C@@H]2[C@]1(C)CC[C@H]1[C@H]2CC=C2[C@]1(C)CC[C@@H](C2)O)C	C29H48O						412.69	Low	No	No	1	3	0	1	2	0.55	0	1	2
pubchem	Linoleic acid	Molecule 58	CCCCC/C=C\C/C=C\CCCCCCCC(=O)O	C18H32O2						280.45	Low	No	No	1	3	0	1	2	0.55	0	1	2
KNApSAck	Thiamine	Molecule 286	OCCc1sc[n+](c1C)Cc1cnc(nc1N)C	C12H17N4OS+	Inactive	Inactive	Inactive	Inactive	Inactive	265.35	High	No	Yes	0	0	0	0	0	0.55	0	1	0
pubchem	3',4',7-Trihydroxyflavone	Molecule 44	Oc1ccc2c(c1)oc(cc2=O)c1ccc(c(c1)O)O	C15H10O5	Inactive	Active	Inactive	Inactive	Inactive	270.24	High	No	No	0	0	0	0	0	0.55	1	1	0
pubchem	6,7,13,14-tetrahydroxy-2,9-dioxatetracyclo[6.6.2.04,16.011,15]hexadeca-1(15),4,6,8(16),11,13-hexaene-3,10-dione	Molecule 50	Oc1cc2c(=O)oc3c4c2c(c1O)oc(=O)c4cc(c3O)O	C14H6O8	Inactive	Active	Inactive	Inactive	Inactive	302.19	High	No	No	0	0	1	1	0	0.55	1	3	0
pubchem	4,7-dimethylene-1-propan-2-yl-1,2,3,4a,5,6,8,8a-octahydronaphthalene	Molecule 62	C=C1CCC2C(C1)C(CCC2=C)C(C)C	C15H24						204.35	Low	No	No	1	0	0	0	1	0.55	0	1	2
pubchem	2-(3,4-dihydroxyphenyl)-5,7-dihydroxy-3-[[(2S,3R,4R,5R,6S)-3,4,5-trihydroxy-6-(hydroxymethyl)-2-oxanyl]oxy]-1-benzopyran-4-one	Molecule 63	OC[C@@H]1O[C@@H](Oc2c(oc3c(c2=O)c(O)cc(c3)O)c2ccc(c(c2)O)O)[C@@H]([C@@H]([C@H]1O)O)O	C21H20O12						464.38	Low	No	No	2	1	1	1	3	0.17	1	1	1
pubchem	2-[[5-hydroxy-6-(hydroxymethyl)-2-[[6-hydroxy-7,9,13-trimethyl-6-[3-methyl-4-[[3,4,5-trihydroxy-6-(hydroxymethyl)-2-oxanyl]oxy]butyl]-5-oxapentacyclo[10.8.0.02,9.04,8.013,18]eicos-18-en-16-yl]oxy]-4-[[3,4,5-trihydroxy-6-(hydroxymethyl)-2-oxanyl]oxy]-3-oxanyl]oxy]-6-methyloxane-3,4,5-triol	Molecule 64	OCC1OC(OC2CCC3(C(=CCC4C3CCC3(C4CC4C3C(C)C(O4)(O)CCC(COC3OC(CO)C(C(C3O)O)O)C)C)C2)C)C(C(C1O)OC1OC(CO)C(C(C1O)O)O)OC1OC(C)C(C(C1O)O)O	C51H84O23						1065.2	Low	No	Yes	3	4	2	1	5	0.17	0	1	2
pubchem	7,4'-Dimethoxyflavone	Molecule 65	COc1ccc(cc1)c1cc(=O)c2c(o1)cc(cc2)OC	C17H14O4						282.29	High	Yes	No	0	0	0	0	0	0.55	0	0	1
pubchem	(E)-3-(4-hydroxy-3-methoxyphenyl)-2-propenoic acid	Molecule 66	COc1cc(/C=C/C(=O)O)ccc1O	C10H10O4						194.18	High	Yes	No	0	0	0	0	1	0.85	0	1	1
pubchem	Oleic acid	Molecule 67	CCCCCCCC/C=C\CCCCCCCC(=O)O	C18H34O2						282.46	High	No	No	1	1	1	1	1	0.85	0	1	2
pubchem	(3S,9S,10R,13R,14R,17R)-10,13-dimethyl-17-[(Z,2R)-5-propan-2-ylhept-5-en-2-yl]-2,3,4,9,11,12,14,15,16,17-decahydro-1H-cyclopenta[a]phenanthren-3-ol	Molecule 68	C/C=C(\C(C)C)/CC[C@H]([C@H]1CC[C@@H]2[C@]1(C)CC[C@H]1C2=CC=C2[C@]1(C)CC[C@@H](C2)O)C	C29H46O						410.67	Low	No	No	1	3	0	1	2	0.55	0	1	2
pubchem	(3R,4aS,8aR)-8a-methyl-5-methylene-3-(1-methylethenyl)-1,2,3,4,4a,6,7,8-octahydronaphthalene	Molecule 69	C=C1CCC[C@]2([C@H]1C[C@@H](CC2)C(=C)C)C	C15H24						204.35	Low	No	No	1	0	0	0	2	0.55	0	1	2
pubchem	Gitogenin	Molecule 70	C[C@@H]1CC[C@@]2(OC1)O[C@@H]1[C@H]([C@@H]2C)[C@@]2([C@@H](C1)[C@@H]1CC[C@@H]3[C@]([C@H]1CC2)(C)C[C@H]([C@@H](C3)O)O)C	C27H44O4						432.64	High	Yes	Yes	1	1	0	0	1	0.55	0	0	2
pubchem	(1S,3R,6S,8S,11S,12S,15R,16R)-12,16-dimethyl-15-[(2R)-6-methylheptan-2-yl]-6-pentacyclo[9.7.0.01,3.03,8.012,16]octadecanol	Molecule 71	CC(CCC[C@H]([C@H]1CC[C@@]2([C@]1(C)CC[C@@]13[C@H]2CC[C@@H]2[C@]3(C1)CC[C@@H](C2)O)C)C)C	C28H48O						400.68	Low	No	No	1	2	0	1	2	0.55	0	0	2
pubchem	(5S)-5-pentyl-2-oxolanone	Molecule 72	CCCCC[C@H]1CCC(=O)O1	C9H16O2						156.22	High	Yes	No	0	1	0	0	1	0.55	0	0	1
pubchem	(2S,3R,4S,5R,6R)-2-[[(2R,3R,4S,5R,6S)-6-[[(2R,3S,4S,5R,6R)-6-[[(2S,3S,4S,5R)-3,4-dihydroxy-2,5-bis(hydroxymethyl)-2-oxolanyl]oxy]-3,4,5-trihydroxy-2-oxanyl]methoxy]-3,4,5-trihydroxy-2-oxanyl]methoxy]-6-(hydroxymethyl)oxane-3,4,5-triol	Molecule 73	OC[C@H]1O[C@@]([C@H]([C@@H]1O)O)(CO)O[C@H]1O[C@H](CO[C@H]2O[C@H](CO[C@H]3O[C@H](CO)[C@@H]([C@@H]([C@H]3O)O)O)[C@@H]([C@@H]([C@H]2O)O)O)[C@H]([C@@H]([C@H]1O)O)O	C24H42O21						666.58	Low	No	Yes	3	4	2	1	5	0.17	0	0	2
pubchem	(2S,3R,4S,5R,6R)-2-[[(2R,3S,4S,5R,6R)-6-[[(2S,3S,4S,5R)-3,4-dihydroxy-2,5-bis(hydroxymethyl)-2-oxolanyl]oxy]-3,4,5-trihydroxy-2-oxanyl]methoxy]-6-(hydroxymethyl)oxane-3,4,5-triol	Molecule 74	OC[C@H]1O[C@@]([C@H]([C@@H]1O)O)(CO)O[C@H]1O[C@H](CO[C@H]2O[C@H](CO)[C@@H]([C@@H]([C@H]2O)O)O)[C@H]([C@@H]([C@H]1O)O)O	C18H32O16						504.44	Low	No	Yes	3	2	1	1	4	0.17	0	0	2
pubchem	(4S)-4-[[[(2S)-1-[(2S)-2-[[(2S)-2-[(2-amino-1-oxoethyl)amino]-3-(4-hydroxyphenyl)-1-oxopropyl]amino]-3-carboxy-1-oxopropyl]-2-pyrrolidinyl]-oxomethyl]amino]-5-[[(2S,3R)-1-[[2-[[(2S,3R)-1-[[(2S)-1-(carboxymethylamino)-3-(1H-indol-3-yl)-1-oxopropan-2-yl]amino]-3-hydroxy-1-oxobutan-2-yl]amino]-2-oxoethyl]amino]-3-hydroxy-1-oxobutan-2-yl]amino]-5-oxopentanoic acid	Molecule 75	NCC(=O)N[C@H](C(=O)N[C@H](C(=O)N1CCC[C@H]1C(=O)N[C@H](C(=O)N[C@H](C(=O)NCC(=O)N[C@H](C(=O)N[C@H](C(=O)NCC(=O)O)Cc1c[nH]c2c1cccc2)[C@H](O)C)[C@H](O)C)CCC(=O)O)CC(=O)O)Cc1ccc(cc1)O	C48H63N11O18						1082.08	Low	No	Yes	3	4	2	1	6	0.11	0	0	2
pubchem	dodecanoic acid	Molecule 76	CCCCCCCCCCCC(=O)O	C12H24O2						200.32	High	Yes	No	0	0	0	0	0	0.85	0	0	3
pubchem	Gallic acid	Molecule 77	OC(=O)c1cc(O)c(c(c1)O)O	C7H6O5						170.12	High	No	No	0	2	0	0	1	0.56	1	1	1
pubchem	2-methoxy-4-prop-2-enylphenol	Molecule 78	C=CCc1ccc(c(c1)OC)O	C10H12O2						164.2	High	Yes	No	0	0	0	0	1	0.55	0	1	1
pubchem	Yuccagenin	Molecule 79	C[C@@H]1CC[C@@]2(OC1)O[C@@H]1[C@H]([C@@H]2C)[C@@]2([C@@H](C1)[C@@H]1CC=C3[C@]([C@H]1CC2)(C)C[C@H]([C@@H](C3)O)O)C	C27H42O4						430.62	High	Yes	Yes	0	1	0	0	0	0.55	0	1	2
pubchem	(2S,3R,4S,5S,6R)-2-[[(2R,3R,4S,5R,6R)-3,5-dihydroxy-2-(hydroxymethyl)-6-[[(4S,5'S,7S,8R,9S,13S)-5',7,9,13-tetramethyl-16-spiro[5-oxapentacyclo[10.8.0.02,9.04,8.013,18]eicosane-6,2'-oxane]yl]oxy]-4-oxanyl]oxy]-6-(hydroxymethyl)oxane-3,4,5-triol	Molecule 80	OC[C@H]1O[C@@H](OC2CC[C@]3(C(C2)CCC2C3CC[C@]3(C2C[C@H]2[C@@H]3[C@H](C)C3(O2)CC[C@@H](CO3)C)C)C)[C@@H]([C@H]([C@@H]1O)O[C@@H]1O[C@H](CO)[C@H]([C@@H]([C@H]1O)O)O)O	C39H64O13						740.92	Low	No	Yes	3	3	1	1	5	0.17	0	1	1
pubchem	5',7,9,13-tetramethylspiro[5-oxapentacyclo[10.8.0.02,9.04,8.013,18]eicosane-6,2'-oxane]-15,16-diol	Molecule 81	CC1CCC2(OC1)OC1C(C2C)C2(C(C1)C1CCC3C(C1CC2)(C)CC(C(C3)O)O)C	C27H44O4						432.64	High	Yes	Yes	1	1	0	0	1	0.55	0	0	2
pubchem	2-(3,4-dihydroxyphenyl)-5,7-dihydroxy-3-[[(2S,3S,4R,5R,6S)-3,4,5-trihydroxy-6-methyl-2-oxanyl]oxy]-1-benzopyran-4-one	Molecule 82	Oc1cc(O)c2c(c1)oc(c(c2=O)O[C@@H]1O[C@@H](C)[C@@H]([C@H]([C@@H]1O)O)O)c1ccc(c(c1)O)O	C21H20O11						448.38	Low	No	Yes	2	0	1	1	3	0.17	1	1	1
pubchem	2-Amino-2,3,5-trideoxy-3-methyl-L-arabinonic acid	Molecule 83	C[C@@H]([C@@H]([C@H](C(=O)[O-])[NH3+])C)O	C6H13NO3						147.17	Low	No	No	0	3	0	0	2	0.55	0	0	1
pubchem	(2R,3S,4R)-2-ammonio-4-hydroxy-3-methylpentanoate	Molecule 84	C[C@H]([C@H]([C@H](C(=O)[O-])[NH3+])C)O	C6H13NO3						147.17	Low	No	No	0	3	0	0	2	0.55	0	0	1
pubchem	1,7,7-trimethyl-2-bicyclo[2.2.1]heptanone	Molecule 85	O=C1CC2C(C1(C)CC2)(C)C	C10H16O						152.23	High	Yes	No	0	1	0	0	2	0.55	0	0	1
pubchem	Trigoxazonane	Molecule 86	CCCCN1COCCOCCO1	C9H19NO3						189.25	High	Yes	No	0	0	0	0	1	0.55	0	0	1
pubchem	5',7,9,13-tetramethyl-16-spiro[5-oxapentacyclo[10.8.0.02,9.04,8.013,18]eicos-18-ene-6,2'-oxane]ol	Molecule 87	CC1CCC2(OC1)OC1C(C2C)C2(C(C1)C1CC=C3C(C1CC2)(C)CCC(C3)O)C	C27H42O3						414.62	High	Yes	No	1	2	0	0	1	0.55	0	1	2
pubchem	beta-Sitosterol	Molecule 88	CC[C@@H](C(C)C)CC[C@H]([C@H]1CC[C@@H]2[C@]1(C)CC[C@H]1[C@H]2CC=C2[C@]1(C)CC[C@@H](C2)O)C	C29H50O						414.71	Low	No	No	1	3	0	1	2	0.55	0	1	2
pubchem	Irilone	Molecule 51	Oc1ccc(cc1)c1coc2c(c1=O)c(O)c1c(c2)OCO1	C16H10O6	Inactive	Active	Active	Inactive	Inactive	298.25	High	No	No	0	0	0	0	0	0.55	0	0	0
pubchem	2-methyl-2-buten-1-ol	Molecule 90	CC(=CC)CO	C5H10O						86.13	High	Yes	No	0	3	0	0	2	0.55	0	1	1
pubchem	hydron;phenoxide	Molecule 91	[O-]c1ccccc1.[H+]	C6H5O						94.11	High	Yes	No	0	3	0	0	2	0.85	0	0	1
pubchem	hydron;oxalate	Molecule 92	[O-]C(=O)C(=O)[O-].[H+].[H+]	C2O4						90.03	Low	No	No	0	4	0	0	2	0.56	0	1	1
pubchem	(1S,3R,4R,5R)-3-[(E)-3-(3,4-dihydroxyphenyl)-1-oxoprop-2-enoxy]-1,4,5-trihydroxy-1-cyclohexanecarboxylic acid	Molecule 93	O=C(O[C@@H]1C[C@@](O)(C[C@H]([C@H]1O)O)C(=O)O)/C=C/c1ccc(c(c1)O)O	C16H18O9						354.31	Low	No	No	1	1	1	1	2	0.11	1	2	1
pubchem	3-[[(2R,3S,4R,5R,6S)-4,5-dihydroxy-6-(hydroxymethyl)-3-[[(2R,3S,4R,5R,6S)-3,4,5-trihydroxy-6-(hydroxymethyl)-2-oxanyl]oxy]-2-oxanyl]oxy]-5-hydroxy-2-(4-hydroxyphenyl)-7-[[(2R,3S,4R,5R,6S)-3,4,5-trihydroxy-6-(hydroxymethyl)-2-oxanyl]oxy]-1-benzopyran-4-one	Molecule 94	OC[C@@H]1O[C@H](Oc2c(oc3c(c2=O)c(O)cc(c3)O[C@H]2O[C@@H](CO)[C@@H]([C@H]([C@@H]2O)O)O)c2ccc(cc2)O)[C@H]([C@@H]([C@H]1O)O)O[C@H]1O[C@@H](CO)[C@@H]([C@H]([C@@H]1O)O)O	C33H40O21						772.66	Low	No	Yes	3	4	1	1	5	0.17	0	0	2
pubchem	(E)-3-(4-hydroxyphenyl)-2-propenoic acid [(2R,3R,4S,5S,6R)-2-[5,7-dihydroxy-2-(4-hydroxyphenyl)-4-oxo-1-benzopyran-8-yl]-4,5-dihydroxy-6-(hydroxymethyl)-3-oxanyl] ester	Molecule 95	OC[C@H]1O[C@@H]([C@@H]([C@H]([C@@H]1O)O)OC(=O)/C=C/c1ccc(cc1)O)c1c(O)cc(c2c1oc(cc2=O)c1ccc(cc1)O)O	C30H26O12						578.52	Low	No	No	3	2	1	1	3	0.17	0	1	1
pubchem	Vitexin 7-O-glucoside	Molecule 96	OC[C@H]1O[C@H]([C@@H]([C@H]([C@@H]1O)O)O)c1c(O[C@@H]2O[C@@H](CO)[C@H]([C@@H]([C@@H]2O)O)O)cc(c2c1oc(cc2=O)c1ccc(cc1)O)O	C27H30O15						594.52	Low	No	Yes	3	4	1	1	3	0.17	0	0	1
pubchem	(1R,2S,4R,5'S,6S,7R,8S,9R,12S,13R)-5',7,9,13-tetramethylspiro[5-oxapentacyclo[10.8.0.02,9.04,8.013,18]eicosa-16,18-diene-6,2'-oxane]	Molecule 97	C[C@H]1CC[C@]2(OC1)O[C@H]1[C@@H]([C@H]2C)[C@]2([C@@H](C1)[C@H]1CC=C3[C@]([C@H]1CC2)(C)CCC=C3)C	C27H40O2						396.61	Low	No	No	1	1	0	1	1	0.55	0	0	2
pubchem	Neocorymboside	Molecule 98	OC[C@H]1O[C@H]([C@@H]([C@H]([C@H]1O)O)O)c1c(O)c([C@@H]2OC[C@@H]([C@@H]([C@@H]2O)O)O)c(c2c1oc(cc2=O)c1ccc(cc1)O)O	C26H28O14						564.49	Low	No	Yes	3	3	1	1	4	0.17	0	0	1
pubchem	5-hydroxy-3-(4-hydroxy-3,5-dimethoxyphenyl)-7-[[(2S,3R,4S,5S,6R)-3,4,5-trihydroxy-6-(hydroxymethyl)-2-oxanyl]oxy]-1-benzopyran-4-one	Molecule 99	OC[C@H]1O[C@@H](Oc2cc(O)c3c(c2)occ(c3=O)c2cc(OC)c(c(c2)OC)O)[C@@H]([C@H]([C@@H]1O)O)O	C23H24O12						492.43	Low	No	Yes	2	1	1	1	3	0.17	0	0	1
pubchem	(1S,2S,4S,5'S,6R,7S,8R,9S,12R,13R,16S)-5',7,9,13-tetramethyl-16-spiro[5-oxapentacyclo[10.8.0.02,9.04,8.013,18]eicos-18-ene-6,2'-oxane]ol	Molecule 100	C[C@H]1CC[C@@]2(OC1)O[C@@H]1[C@H]([C@@H]2C)[C@@]2([C@@H](C1)[C@@H]1CC=C3[C@]([C@@H]1CC2)(C)CC[C@@H](C3)O)C	C27H42O3						414.62	High	Yes	No	1	2	0	0	1	0.55	0	1	2
pubchem	acetic acid [(2R,3R,4R,5R,6S)-3,4-dihydroxy-6-[[5-hydroxy-2-(4-hydroxyphenyl)-4-oxo-7-[[(2S,3S,4S,5S,6R)-3,4,5-trihydroxy-6-(hydroxymethyl)-2-oxanyl]oxy]-1-benzopyran-3-yl]oxy]-5-[[(2R,3R,4R,5R,6S)-3,4,5-trihydroxy-6-(hydroxymethyl)-2-oxanyl]oxy]-2-oxanyl]methyl ester	Molecule 101	OC[C@@H]1O[C@H](O[C@H]2[C@@H](O[C@@H]([C@@H]([C@H]2O)O)COC(=O)C)Oc2c(oc3c(c2=O)c(O)cc(c3)O[C@@H]2O[C@H](CO)[C@H]([C@@H]([C@@H]2O)O)O)c2ccc(cc2)O)[C@@H]([C@@H]([C@H]1O)O)O	C35H42O22						814.69	Low	No	Yes	3	4	2	1	5	0.17	0	0	2
pubchem	acetic acid [(2S,3R,4S,5R,6S)-3,4-dihydroxy-6-[[5-hydroxy-2-(4-hydroxyphenyl)-4-oxo-7-[[(2S,3S,4S,5S,6R)-3,4,5-trihydroxy-6-(hydroxymethyl)-2-oxanyl]oxy]-1-benzopyran-3-yl]oxy]-5-[[(2S,3S,4S,5S,6S)-3,4,5-trihydroxy-6-(hydroxymethyl)-2-oxanyl]oxy]-2-oxanyl]methyl ester	Molecule 102	OC[C@@H]1O[C@@H](O[C@H]2[C@@H](O[C@H]([C@@H]([C@@H]2O)O)COC(=O)C)Oc2c(oc3c(c2=O)c(O)cc(c3)O[C@@H]2O[C@H](CO)[C@H]([C@@H]([C@@H]2O)O)O)c2ccc(cc2)O)[C@H]([C@H]([C@@H]1O)O)O	C35H42O22						814.69	Low	No	Yes	3	4	2	1	5	0.17	0	0	2
pubchem	1-methyl-1,2-dihydropyridin-1-ium-3-carboxylate	Molecule 103	C[NH+]1C=CC=C(C1)C(=O)[O-]	C7H9NO2						139.15	Low	No	No	0	3	0	0	1	0.55	0	0	1
pubchem	3-[[(2S,3R,4S,5R,6S)-4,5-dihydroxy-6-(hydroxymethyl)-3-[[(2S,3R,4S,5S,6R)-3,4,5-trihydroxy-6-(hydroxymethyl)-2-oxanyl]oxy]-2-oxanyl]oxy]-2-(3,4-dihydroxyphenyl)-5-hydroxy-7-[[(2S,3R,4S,5S,6S)-3,4,5-trihydroxy-6-(hydroxymethyl)-2-oxanyl]oxy]-1-benzopyran-4-one	Molecule 104	OC[C@@H]1O[C@@H](Oc2c(oc3c(c2=O)c(O)cc(c3)O[C@@H]2O[C@@H](CO)[C@H]([C@@H]([C@H]2O)O)O)c2ccc(c(c2)O)O)[C@@H]([C@H]([C@H]1O)O)O[C@@H]1O[C@H](CO)[C@H]([C@@H]([C@H]1O)O)O	C33H40O22						788.66	Low	No	Yes	3	4	1	1	5	0.17	1	1	2
pubchem	Calycosin	Molecule 59	COc1ccc(cc1O)c1coc2c(c1=O)ccc(c2)O	C16H12O5	Inactive	Inactive	Active	Inactive	Inactive	284.26	High	No	No	0	0	0	0	0	0.55	0	0	0
pubchem	2-[[4,5-dihydroxy-6-methyl-2-[[3,4,5-trihydroxy-6-[(5',7,9,13-tetramethyl-16-spiro[5-oxapentacyclo[10.8.0.02,9.04,8.013,18]eicos-18-ene-6,2'-oxane]yl)oxy]-2-oxanyl]methoxy]-3-oxanyl]oxy]-6-(hydroxymethyl)oxane-3,4,5-triol	Molecule 106	OCC1OC(OC2C(OCC3OC(OC4CCC5(C(=CCC6C5CCC5(C6CC6C5C(C)C5(O6)CCC(CO5)C)C)C4)C)C(C(C3O)O)O)OC(C(C2O)O)C)C(C(C1O)O)O	C45H72O17						885.04	Low	No	Yes	3	3	1	1	5	0.17	0	1	2
pubchem	2-[[6-[[4,5-dihydroxy-6-methyl-2-[[3,4,5-trihydroxy-6-[(5',7,9,13-tetramethyl-16-spiro[5-oxapentacyclo[10.8.0.02,9.04,8.013,18]eicos-18-ene-6,2'-oxane]yl)oxy]-2-oxanyl]methoxy]-3-oxanyl]oxy]-4,5-dihydroxy-2-(hydroxymethyl)-3-oxanyl]oxy]-6-(hydroxymethyl)oxane-3,4,5-triol	Molecule 107	OCC1OC(OC2C(OCC3OC(OC4CCC5(C(=CCC6C5CCC5(C6CC6C5C(C)C5(O6)CCC(CO5)C)C)C4)C)C(C(C3O)O)O)OC(C(C2O)O)C)C(C(C1OC1OC(CO)C(C(C1O)O)O)O)O	C51H82O22						1047.18	Low	No	Yes	3	4	2	1	5	0.17	0	1	2
pubchem	(1aR,7R,7aR,7bS)-1,1,7,7a-tetramethyl-2,3,5,6,7,7b-hexahydro-1aH-cyclopropa[a]naphthalene	Molecule 108	C[C@@H]1CCC=C2[C@@]1(C)[C@H]1[C@H](C1(C)C)CC2	C15H24						204.35	Low	No	No	1	0	0	0	1	0.55	0	1	2
pubchem	3-octen-2-one	Molecule 109	CCCCC=CC(=O)C	C8H14O						126.2	High	Yes	No	0	1	0	0	2	0.55	0	1	1
pubchem	1-octen-2-ol	Molecule 110	CCCCCCC(=C)O	C8H16O						128.21	High	Yes	No	0	1	0	0	2	0.55	0	1	1
pubchem	1-tetradecene	Molecule 111	CCCCCCCCCCCCC=C	C14H28						196.37	Low	No	No	1	0	1	0	3	0.55	0	1	3
pubchem	undecane	Molecule 112	CCCCCCCCCCC	C11H24						156.31	Low	No	No	1	1	0	0	3	0.55	0	0	3
pubchem	5-hydroxy-2-(4-hydroxy-3,5-dimethoxyphenyl)-7-[[3,4,5-trihydroxy-6-(hydroxymethyl)-2-oxanyl]oxy]-1-benzopyran-4-one	Molecule 113	OCC1OC(Oc2cc(O)c3c(c2)oc(cc3=O)c2cc(OC)c(c(c2)OC)O)C(C(C1O)O)O	C23H24O12						492.43	Low	No	Yes	2	1	1	1	3	0.17	0	0	1
pubchem	5-hydroxy-2-(4-hydroxyphenyl)-3,7-bis[[3,4,5-trihydroxy-6-(hydroxymethyl)-2-oxanyl]oxy]-1-benzopyran-4-one	Molecule 114	OCC1OC(Oc2cc(O)c3c(c2)oc(c(c3=O)OC2OC(CO)C(C(C2O)O)O)c2ccc(cc2)O)C(C(C1O)O)O	C27H30O16						610.52	Low	No	Yes	3	4	1	1	4	0.17	0	0	1
pubchem	decanoate;hydron	Molecule 115	CCCCCCCCCC(=O)[O-].[H+]	C10H19O2						172.26	High	Yes	No	0	0	0	0	1	0.85	0	0	3
pubchem	(3S,8S,9S,10R,13S,14S,17R)-10,13-dimethyl-17-[(Z,2R)-5-propan-2-ylhept-5-en-2-yl]-2,3,4,7,8,9,11,12,14,15,16,17-dodecahydro-1H-cyclopenta[a]phenanthren-3-ol	Molecule 116	C/C=C(\C(C)C)/CC[C@H]([C@H]1CC[C@@H]2[C@@]1(C)CC[C@H]1[C@H]2CC=C2[C@]1(C)CC[C@@H](C2)O)C	C29H48O						412.69	Low	No	No	1	3	0	1	2	0.55	0	1	2
pubchem	Trigofoenoside B	Molecule 117	OCC1OC(OC2CC3CCC4C(C3(CC2O)C)CCC2(C4CC3C2C(C(O3)(O)CCC(COC2OC(CO)C(C(C2O)O)O)C)C)C)C(C(C1OC1OC(C)C(C(C1O)O)O)O)O	C45H76O19						921.07	Low	No	Yes	3	4	2	1	5	0.17	0	1	2
pubchem	2-[[4-hydroxy-6-(hydroxymethyl)-2-[[3,4,5-trihydroxy-6-[[6-hydroxy-7,9,13-trimethyl-6-[3-methyl-4-[[3,4,5-trihydroxy-6-(hydroxymethyl)-2-oxanyl]oxy]butyl]-5-oxapentacyclo[10.8.0.02,9.04,8.013,18]eicos-18-en-16-yl]oxy]-2-oxanyl]methoxy]-5-[(3,4,5-trihydroxy-2-oxanyl)oxy]-3-oxanyl]oxy]-6-methyloxane-3,4,5-triol	Molecule 118	OCC1OC(OCC2OC(OC3CCC4(C(=CCC5C4CCC4(C5CC5C4C(C)C(O5)(O)CCC(COC4OC(CO)C(C(C4O)O)O)C)C)C3)C)C(C(C2O)O)O)C(C(C1OC1OCC(C(C1O)O)O)O)OC1OC(C)C(C(C1O)O)O	C56H92O27						1197.31	Low	No	Yes	3	4	2	1	7	0.17	0	1	2
pubchem	2-[[4,5-dihydroxy-6-(hydroxymethyl)-2-[[3,4,5-trihydroxy-6-[[6-hydroxy-7,9,13-trimethyl-6-[3-methyl-4-[[3,4,5-trihydroxy-6-(hydroxymethyl)-2-oxanyl]oxy]butyl]-5-oxapentacyclo[10.8.0.02,9.04,8.013,18]eicos-18-en-16-yl]oxy]-2-oxanyl]methoxy]-3-oxanyl]oxy]-6-methyloxane-3,4,5-triol	Molecule 119	OCC1OC(OCC2OC(OC3CCC4(C(=CCC5C4CCC4(C5CC5C4C(C)C(O5)(O)CCC(COC4OC(CO)C(C(C4O)O)O)C)C)C3)C)C(C(C2O)O)O)C(C(C1O)O)OC1OC(C)C(C(C1O)O)O	C51H84O23						1065.2	Low	No	Yes	3	4	2	1	5	0.17	0	1	2
pubchem	3-[[(2S,3R,4S,5R,6R)-4,5-dihydroxy-6-(hydroxymethyl)-3-[[(2S,3R,4S,5S,6R)-3,4,5-trihydroxy-6-(hydroxymethyl)-2-oxanyl]oxy]-2-oxanyl]oxy]-5-hydroxy-2-(4-hydroxyphenyl)-7-[[(2S,3R,4S,5S,6R)-3,4,5-trihydroxy-6-(hydroxymethyl)-2-oxanyl]oxy]-1-benzopyran-4-one	Molecule 120	OC[C@H]1O[C@@H](Oc2c(oc3c(c2=O)c(O)cc(c3)O[C@@H]2O[C@H](CO)[C@H]([C@@H]([C@H]2O)O)O)c2ccc(cc2)O)[C@@H]([C@H]([C@H]1O)O)O[C@@H]1O[C@H](CO)[C@H]([C@@H]([C@H]1O)O)O	C33H40O21						772.66	Low	No	Yes	3	4	1	1	5	0.17	0	0	2
pubchem	3-[[(2S,3R,4S,5R,6R)-4,5-dihydroxy-6-(hydroxymethyl)-3-[[(2S,3R,4S,5S,6R)-3,4,5-trihydroxy-6-(hydroxymethyl)-2-oxanyl]oxy]-2-oxanyl]oxy]-2-(3,4-dihydroxyphenyl)-5-hydroxy-7-[[(2S,3R,4S,5S,6R)-3,4,5-trihydroxy-6-(hydroxymethyl)-2-oxanyl]oxy]-1-benzopyran-4-one	Molecule 121	OC[C@H]1O[C@@H](Oc2c(oc3c(c2=O)c(O)cc(c3)O[C@@H]2O[C@H](CO)[C@H]([C@@H]([C@H]2O)O)O)c2ccc(c(c2)O)O)[C@@H]([C@H]([C@H]1O)O)O[C@@H]1O[C@H](CO)[C@H]([C@@H]([C@H]1O)O)O	C33H40O22						788.66	Low	No	Yes	3	4	1	1	5	0.17	1	1	2
pubchem	5-ethyl-2-oxolanone	Molecule 122	CCC1CCC(=O)O1	C6H10O2						114.14	High	Yes	No	0	3	0	0	1	0.55	0	0	1
pubchem	1-hexadecene	Molecule 123	CCCCCCCCCCCCCCC=C	C16H32						224.43	Low	No	No	1	1	1	1	2	0.55	0	1	3
pubchem	pentadecane	Molecule 124	CCCCCCCCCCCCCCC	C15H32						212.41	Low	No	No	1	1	1	1	2	0.55	0	0	3
pubchem	tetradecane	Molecule 125	CCCCCCCCCCCCCC	C14H30						198.39	Low	No	No	1	1	1	0	3	0.55	0	0	3
pubchem	tridecane	Molecule 126	CCCCCCCCCCCCC	C13H28						184.36	Low	No	No	1	0	0	0	3	0.55	0	0	3
pubchem	(3S,8S,9S,10R,13R,14S,17R)-17-[(2R)-5,6-dimethylheptan-2-yl]-10,13-dimethyl-2,3,4,7,8,9,11,12,14,15,16,17-dodecahydro-1H-cyclopenta[a]phenanthren-3-ol	Molecule 127	O[C@H]1CC[C@]2(C(=CC[C@@H]3[C@@H]2CC[C@]2([C@H]3CC[C@@H]2[C@@H](CCC(C(C)C)C)C)C)C1)C	C28H48O						400.68	Low	No	No	1	2	0	1	2	0.55	0	1	2
pubchem	(9R,10S,13R,14R,17R)-17-[(2R,5R)-5-ethyl-6-methylheptan-2-yl]-10,13-dimethyl-2,3,4,5,6,9,11,12,14,15,16,17-dodecahydro-1H-cyclopenta[a]phenanthren-3-ol	Molecule 128	CC[C@@H](C(C)C)CC[C@H]([C@H]1CC[C@@H]2[C@]1(C)CC[C@H]1C2=CCC2[C@]1(C)CCC(C2)O)C	C29H50O						414.71	Low	No	No	1	3	0	1	2	0.55	0	1	2
pubchem	(1S,4aS,8aR)-7-methyl-4-methylene-1-propan-2-yl-2,3,4a,5,6,8a-hexahydro-1H-naphthalene	Molecule 129	CC1=C[C@@H]2[C@H](CC1)C(=C)CC[C@H]2C(C)C	C15H24						204.35	Low	No	No	1	0	0	0	1	0.55	0	1	2
pubchem	lilagenin	Molecule 130	C[C@H]1CC[C@@]2(OC1)O[C@@H]1[C@H]([C@@H]2C)[C@@]2([C@@H](C1)[C@@H]1CC=C3[C@]([C@H]1CC2)(C)C[C@H]([C@@H](C3)O)O)C	C27H42O4						430.62	High	Yes	Yes	0	1	0	0	0	0.55	0	1	2
pubchem	(3R,4R)-4-ethenyl-4-methyl-3-(1-methylethenyl)-1-propan-2-ylcyclohexene	Molecule 131	C=C[C@@]1(C)CCC(=C[C@@H]1C(=C)C)C(C)C	C15H24						204.35	Low	No	No	1	0	0	0	2	0.55	0	1	2
pubchem	alpha-Muurolene	Molecule 132	CC1=C[C@@H]2[C@H](CC1)C(=CC[C@H]2C(C)C)C	C15H24						204.35	Low	No	No	1	0	0	0	1	0.55	0	1	2
pubchem	Neotigogenin	Molecule 133	C[C@H]1CC[C@@]2(OC1)O[C@@H]1[C@H]([C@@H]2C)[C@@]2([C@@H](C1)[C@@H]1CC[C@@H]3[C@]([C@H]1CC2)(C)CC[C@@H](C3)O)C	C27H44O3						416.64	High	Yes	No	1	2	0	0	1	0.55	0	0	2
pubchem	Trigoforin	Molecule 134	Cc1ccc2c(c1)oc(=O)c(c2C)C	C12H12O2						188.22	High	Yes	No	0	0	0	0	1	0.55	0	1	1
pubchem	acetic acid (1-methylcyclohexyl) ester	Molecule 135	CC(=O)OC1(C)CCCCC1	C9H16O2						156.22	High	Yes	No	0	1	0	0	1	0.55	0	0	1
pubchem	4-methyl-1-benzopyran-2-one	Molecule 136	O=c1cc(C)c2c(o1)cccc2	C10H8O2						160.17	High	Yes	No	0	0	0	0	1	0.55	0	1	1
pubchem	6-[4-[2-(1-piperidinyl)ethoxy]phenyl]-3-pyridin-4-ylpyrazolo[1,5-a]pyrimidine	Molecule 137	C1CCN(CC1)CCOc1ccc(cc1)c1cnc2n(c1)ncc2c1ccncc1	C24H25N5O						399.49	High	Yes	Yes	0	0	0	0	0	0.55	0	0	1
pubchem	N-phenylaniline	Molecule 138	c1ccc(cc1)Nc1ccccc1	C12H11N						169.22	High	Yes	No	0	0	0	0	2	0.55	0	0	1
pubchem	Isoorientin	Molecule 139	OC[C@H]1O[C@H]([C@@H]([C@H]([C@@H]1O)O)O)c1c(O)cc2c(c1O)c(=O)cc(o2)c1ccc(c(c1)O)O	C21H20O11						448.38	Low	No	No	2	1	1	1	3	0.17	1	1	1
pubchem	3-hydroxy-2-phenyl-1-benzopyran-4-one	Molecule 140	O=c1c(O)c(oc2c1cccc2)c1ccccc1	C15H10O3						238.24	High	Yes	No	0	0	0	0	0	0.55	0	0	1
pubchem	(2S,3S,4R)-2-amino-4-hydroxy-3-methylpentanoic acid	Molecule 141	C[C@H]([C@H]([C@@H](C(=O)O)N)C)O	C6H13NO3						147.17	High	No	No	0	3	0	0	2	0.55	0	0	1
pubchem	hexadecane	Molecule 142	CCCCCCCCCCCCCCCC	C16H34						226.44	Low	No	No	1	1	1	1	2	0.55	0	0	3
pubchem	2,3-dihydrobenzofuran	Molecule 143	c1ccc2c(c1)OCC2	C8H8O						120.15	High	Yes	No	0	3	0	0	2	0.55	0	0	1
pubchem	2''-O-p-Coumaroylorientin	Molecule 144	OC[C@H]1O[C@H]([C@@H]([C@H]([C@@H]1O)O)OC(=O)/C=C/c1ccc(cc1)O)c1c(O)cc(c2c1oc(cc2=O)c1ccc(c(c1)O)O)O	C30H26O13						594.52	Low	No	No	3	2	1	1	3	0.17	1	2	1
pubchem	acetic acid [(2R,3R,4S,5R,6S)-3,4-dihydroxy-6-[[5-hydroxy-2-(4-hydroxyphenyl)-4-oxo-7-[[(2S,3R,4S,5S,6R)-3,4,5-trihydroxy-6-(hydroxymethyl)-2-oxanyl]oxy]-1-benzopyran-3-yl]oxy]-5-[[(2S,3R,4S,5S,6R)-3,4,5-trihydroxy-6-(hydroxymethyl)-2-oxanyl]oxy]-2-oxanyl]methyl ester	Molecule 145	OC[C@H]1O[C@@H](O[C@H]2[C@@H](O[C@@H]([C@@H]([C@@H]2O)O)COC(=O)C)Oc2c(oc3c(c2=O)c(O)cc(c3)O[C@@H]2O[C@H](CO)[C@H]([C@@H]([C@H]2O)O)O)c2ccc(cc2)O)[C@@H]([C@H]([C@@H]1O)O)O	C35H42O22						814.69	Low	No	Yes	3	4	2	1	5	0.17	0	0	2
pubchem	3,5-dihydroxy-2-(4-hydroxyphenyl)-7-[[(2S,3R,4S,5S,6R)-3,4,5-trihydroxy-6-(hydroxymethyl)-2-oxanyl]oxy]-1-benzopyran-4-one	Molecule 146	OC[C@H]1O[C@@H](Oc2cc(O)c3c(c2)oc(c(c3=O)O)c2ccc(cc2)O)[C@@H]([C@H]([C@@H]1O)O)O	C21H20O11						448.38	Low	No	Yes	2	0	1	1	3	0.17	0	0	1
IMPPAT	gamma-Eudesmol	Molecule 147	CC1=C2C[C@@H](CC[C@]2(CCC1)C)C(O)(C)C	C15H26O						222.37	High	Yes	No	0	0	0	0	1	0.55	0	1	1
IMPPAT	(+)-delta-Cadinene	Molecule 148	CC1=C[C@@H]2C(=C(C)CC[C@H]2C(C)C)CC1	C15H24						204.35	Low	No	No	1	0	0	0	1	0.55	0	1	2
IMPPAT	(-)-alpha-Cadinol	Molecule 149	CC1=CC2C(CC1)[C@@](C)(O)CC[C@@H]2C(C)C	C15H26O						222.37	High	Yes	No	0	0	0	0	1	0.55	0	1	1
IMPPAT	Levomenol	Molecule 150	CC(=CCC[C@@]([C@H]1CCC(=CC1)C)(O)C)C	C15H26O						222.37	High	Yes	No	0	0	0	0	1	0.55	0	1	2
IMPPAT	1-Isopropyl-4,7-dimethyl-1,3,4,5,6,8a-hexahydro-4a(2H)-naphthalenol	Molecule 151	CC1=CC2C(CC1)(O)C(C)CCC2C(C)C	C15H26O						222.37	High	Yes	No	0	0	0	0	1	0.55	0	1	2
IMPPAT	alpha-Muurolol	Molecule 152	CC1=C[C@@H]2[C@H](CC1)[C@](C)(O)CC[C@@H]2C(C)C	C15H26O						222.37	High	Yes	No	0	0	0	0	1	0.55	0	1	1
IMPPAT	Liguloxide	Molecule 153	CC1CCC2CC3(C1CCC3C)OC2(C)C	C15H26O						222.37	High	Yes	No	0	0	0	0	1	0.55	0	0	2
IMPPAT	Pyridoxine	Molecule 154	OCc1c(CO)cnc(c1O)C	C8H11NO3						169.18	High	No	No	0	0	0	0	1	0.55	0	0	1
IMPPAT	Fenugreekine	Molecule 155	O[C@@H]1[C@H](O)[C@H](O[C@H]1c1cccc(n1)C(=O)N)COP(=O)(OP(=O)(OC[C@H]1O[C@H]([C@@H]([C@@H]1O)O)n1cnc2c1ncnc2N)O)O	C21H27N7O14P2						663.43	Low	No	No	3	4	2	1	5	0.11	0	1	2
IMPPAT	Riboflavin	Molecule 156	OC[C@H]([C@H]([C@H](Cn1c2cc(C)c(cc2nc2c1nc(=O)[nH]c2=O)C)O)O)O	C17H20N4O6						376.36	Low	No	No	0	1	1	1	1	0.55	0	1	1
IMPPAT	Carvacrol	Molecule 157	CC(c1ccc(c(c1)O)C)C	C10H14O						150.22	High	Yes	No	0	1	0	0	2	0.55	0	0	1
IMPPAT	Calcium pantothenate	Molecule 158	OCC([C@H](C(=O)NCCC(=O)[O-])O)(C)C.OCC([C@H](C(=O)NCCC(=O)[O-])O)(C)C.[Ca+2]	C18H32CaN2O10						476.53	Low	No	Yes	2	1	2	1	3	0.17	0	0	2
IMPPAT	Elemicin	Molecule 159	C=CCc1cc(OC)c(c(c1)OC)OC	C12H16O3						208.25	High	Yes	No	0	0	0	0	0	0.55	0	1	1
pubchem	Luteolin	Molecule 60	Oc1cc(O)c2c(c1)oc(cc2=O)c1ccc(c(c1)O)O	C15H10O6	Inactive	Active	Inactive	Active	Inactive	286.24	High	No	No	0	0	0	0	0	0.55	1	1	0
IMPPAT	Graecunin D	Molecule 163	[NH3+]CC(=O)N[C@H](C(=O)N[C@H](C(=O)N1CCC[C@H]1C(=O)N[C@H](C(=O)N[C@H](C(=O)NCC(=O)N[C@H](C(=O)N[C@H](C(=O)NCC(=O)O)Cc1c[nH]c2c1cccc2)[C@H](O)C)[C@H](O)C)CCC(=O)O)CC(=O)O)Cc1ccc(cc1)O	C48H64N11O18+						1083.08	Low	No	Yes	3	4	2	1	6	0.11	0	0	2
IMPPAT	Pentadecanal	Molecule 164	CCCCCCCCCCCCCCC=O	C15H30O						226.4	High	Yes	No	0	0	1	0	2	0.55	0	1	3
IMPPAT	Myristicin	Molecule 165	C=CCc1cc(OC)c2c(c1)OCO2	C11H12O3						192.21	High	Yes	No	0	0	0	0	1	0.55	0	1	1
IMPPAT	Yamogenin	Molecule 166	C[C@H]1CC[C@@]2(OC1)O[C@@H]1[C@H]([C@@H]2C)[C@@]2([C@@H](C1)[C@@H]1CC=C3[C@]([C@H]1CC2)(C)CC[C@@H](C3)O)C	C27H42O3						414.62	High	Yes	No	1	2	0	0	1	0.55	0	1	2
IMPPAT	2-Dodecenal	Molecule 167	CCCCCCCCC/C=C/C=O	C12H22O						182.3	High	Yes	No	0	0	0	0	2	0.55	0	2	3
IMPPAT	Stearic acid	Molecule 168	CCCCCCCCCCCCCCCCCC(=O)O	C18H36O2						284.48	High	No	No	1	1	1	1	2	0.85	0	0	2
IMPPAT	Biotin	Molecule 169	OC(=O)CCCC[C@@H]1SC[C@H]2[C@@H]1NC(=O)N2	C10H16N2O3S						244.31	High	No	Yes	0	0	0	0	0	0.56	0	1	1
IMPPAT	p-Cymene	Molecule 170	Cc1ccc(cc1)C(C)C	C10H14						134.22	Low	Yes	No	1	1	0	0	2	0.55	0	0	2
IMPPAT	Folic	Molecule 171	OC(=O)CC[C@@H](C(=O)O)NC(=O)c1ccc(cc1)NCc1cnc2c(n1)c(=O)nc([nH]2)N	C19H19N7O6						441.4	Low	No	No	2	0	1	1	2	0.11	0	0	2
pubchem	Formononetin	Molecule 61	COc1ccc(cc1)c1coc2c(c1=O)ccc(c2)O	C16H12O4	Inactive	Active	Active	Inactive	Inactive	268.26	High	Yes	No	0	0	0	0	0	0.55	0	0	0
IMPPAT	1-Decanol	Molecule 173	CCCCCCCCCCO	C10H22O						158.28	High	Yes	No	0	1	0	0	2	0.55	0	0	3
IMPPAT	Decanal	Molecule 174	CCCCCCCCCC=O	C10H20O						156.27	High	Yes	No	0	1	0	0	2	0.55	0	1	3
IMPPAT	Docosanoic acid	Molecule 175	CCCCCCCCCCCCCCCCCCCCCC(=O)O	C22H44O2						340.58	Low	No	No	1	1	1	1	2	0.85	0	0	2
IMPPAT	Palmitic acid	Molecule 176	CCCCCCCCCCCCCCCC(=O)O	C16H32O2						256.42	High	Yes	No	1	0	1	0	1	0.85	0	0	2
IMPPAT	Nicotinic acid	Molecule 177	OC(=O)c1cccnc1	C6H5NO2						123.11	High	Yes	No	0	3	0	0	1	0.85	0	0	1
IMPPAT	Inositol	Molecule 178	OC1C(O)C(O)C(C(C1O)O)O	C6H12O6						180.16	Low	No	Yes	1	2	0	0	3	0.55	0	0	1
IMPPAT	Isopiperitenone	Molecule 179	CC1=CC(=O)C(CC1)C(=C)C	C10H14O						150.22	High	Yes	No	0	1	0	0	2	0.55	0	1	1
IMPPAT	Isovitexin	Molecule 180	OC[C@H]1O[C@H]([C@@H]([C@H]([C@@H]1O)O)O)c1c(O)cc2c(c1O)c(=O)cc(o2)c1ccc(cc1)O	C21H20O10						432.38	Low	No	No	1	0	1	1	2	0.55	0	0	1
IMPPAT	Vitamin E	Molecule 181	C[C@@H](CCC[C@]1(C)CCc2c(O1)c(C)c(c(c2C)O)C)CCC[C@@H](CCCC(C)C)C	C29H50O2						430.71	Low	No	Yes	1	3	1	1	1	0.55	0	0	3
IMPPAT	(1R,2R,4S,5R)-6-[(2S,3S,4R,5S,6S)-3,4,5-trihydroxy-6-(hydroxymethyl)oxan-2-yl]oxycyclohexane-1,2,3,4,5-pentol	Molecule 183	OC[C@@H]1O[C@@H](OC2[C@H](O)[C@H](O)C([C@@H]([C@H]2O)O)O)[C@H]([C@@H]([C@@H]1O)O)O	C12H22O11						342.3	Low	No	Yes	2	1	1	1	4	0.17	0	0	0
IMPPAT	Arachidic acid	Molecule 184	CCCCCCCCCCCCCCCCCCCC(=O)O	C20H40O2						312.53	Low	No	No	1	1	1	1	2	0.85	0	0	2
IMPPAT	beta-Tocopherol	Molecule 185	C[C@H](CCC[C@@H](CCCC(C)C)C)CCC[C@]1(C)CCc2c(O1)c(C)cc(c2C)O	C28H48O2						416.68	Low	No	Yes	1	3	1	1	1	0.55	0	0	3
IMPPAT	Apiole	Molecule 186	C=CCc1cc(OC)c2c(c1OC)OCO2	C12H14O4						222.24	High	Yes	No	0	0	0	0	0	0.55	0	1	1
IMPPAT	alpha-Carotene	Molecule 187	CC(=CC=CC=C(C=CC=C(C=CC1=C(C)CCCC1(C)C)C)C)/C=C/C=C(/C=C/[C@H]1C(=CCCC1(C)C)C)\C	C40H56						536.87	Low	No	Yes	2	4	0	1	2	0.17	0	2	3
IMPPAT	Neogitogenin	Molecule 188	C[C@H]1CC[C@@]2(OC1)O[C@@H]1[C@H]([C@@H]2C)[C@@]2([C@@H](C1)[C@@H]1CC[C@@H]3[C@]([C@H]1CC2)(C)C[C@H]([C@@H](C3)O)O)C	C27H44O4						432.64	High	Yes	Yes	1	1	0	0	1	0.55	0	0	2
IMPPAT	beta-Carotene	Molecule 189	CC(=CC=CC=C(/C=C/C=C(/C=C/C1=C(C)CCCC1(C)C)\C)C)C=CC=C(C=CC1=C(C)CCCC1(C)C)C	C40H56						536.87	Low	No	Yes	2	4	0	1	2	0.17	0	1	3
IMPPAT	Vicenin 1	Molecule 190	OCC1O[C@H](C([C@@H]([C@@H]1O)O)O)c1c(O)c([C@@H]2OC[C@H]([C@@H](C2O)O)O)c(c2c1oc(cc2=O)c1ccc(cc1)O)O	C26H28O14						564.49	Low	No	No	3	3	1	1	4	0.17	0	0	1
IMPPAT	(+)-beta-Phellandrene	Molecule 191	CC([C@@H]1CCC(=C)C=C1)C	C10H16						136.23	Low	Yes	No	0	1	0	0	2	0.55	0	0	1
IMPPAT	(-)-cis-Carveol	Molecule 192	CC(=C)[C@@H]1CC=C([C@@H](C1)O)C	C10H16O						152.23	High	Yes	No	0	1	0	0	2	0.55	0	1	1
IMPPAT	(-)-trans-Carveol	Molecule 193	CC(=C)[C@@H]1CC=C([C@H](C1)O)C	C10H16O						152.23	High	Yes	No	0	1	0	0	2	0.55	0	1	1
IMPPAT	alpha-Pinene	Molecule 194	CC1=CCC2CC1C2(C)C	C10H16						136.23	Low	Yes	No	1	1	0	0	2	0.55	0	1	2
IMPPAT	Carvone	Molecule 195	CC(=C)C1CC=C(C(=O)C1)C	C10H14O						150.22	High	Yes	No	0	1	0	0	2	0.55	0	1	1
IMPPAT	Vicenin-2	Molecule 196	OC[C@H]1O[C@H]([C@@H]([C@H]([C@@H]1O)O)O)c1c(O)c([C@@H]2O[C@H](CO)[C@H]([C@@H]([C@H]2O)O)O)c(c2c1oc(cc2=O)c1ccc(cc1)O)O	C27H30O15						594.52	Low	No	Yes	3	4	1	1	4	0.17	0	0	1
IMPPAT	Phytol	Molecule 197	OC/C=C(/CCC[C@@H](CCC[C@@H](CCCC(C)C)C)C)\C	C20H40O						296.53	Low	No	Yes	1	1	1	1	2	0.55	0	1	2
IMPPAT	Vitexin	Molecule 198	OC[C@H]1O[C@H]([C@@H]([C@H]([C@@H]1O)O)O)c1c(O)cc(c2c1oc(cc2=O)c1ccc(cc1)O)O	C21H20O10						432.38	Low	No	No	1	0	1	1	2	0.55	0	0	1
IMPPAT	Trigofoenoside A	Molecule 199	OC[C@H]1O[C@@H](O[C@H]2CC[C@]3(C(=CCC4C3CC[C@]3(C4CC4C3C(C)C(O4)(O)CC[C@H](CO[C@@H]3O[C@H](CO)[C@H]([C@@H]([C@H]3O)O)O)C)C)C2)C)[C@@H]([C@H]([C@@H]1O)O)O[C@@H]1O[C@@H](C)[C@@H]([C@H]([C@H]1O)O)O	C45H74O18						903.06	Low	No	Yes	3	4	2	1	5	0.17	0	1	2
IMPPAT	alpha-Phellandrene	Molecule 200	CC1=CCC(C=C1)C(C)C	C10H16						136.23	Low	Yes	No	0	1	0	0	2	0.55	0	0	1
IMPPAT	Limonene	Molecule 201	CC1=CCC(CC1)C(=C)C	C10H16						136.23	Low	Yes	No	0	1	0	0	2	0.55	0	1	2
IMPPAT	Menthone	Molecule 202	C[C@@H]1CC[C@H](C(=O)C1)C(C)C	C10H18O						154.25	High	Yes	No	0	1	0	0	2	0.55	0	0	1
IMPPAT	(+)-cis-Sabinol	Molecule 203	CC([C@]12C[C@@H]2C(=C)[C@@H](C1)O)C	C10H16O						152.23	High	Yes	No	0	1	0	0	2	0.55	0	1	1
IMPPAT	Galactomannan	Molecule 204	OC[C@H]1O[C@H](OC[C@H]2O[C@@H](O)[C@H]([C@H]([C@@H]2O[C@@H]2O[C@H](CO)[C@H]([C@@H]([C@@H]2O)O)O)O)O)[C@@H]([C@H]([C@H]1O)O)O	C18H32O16						504.44	Low	No	Yes	3	2	1	1	4	0.17	0	0	1
IMPPAT	Pyrrolidine	Molecule 205	C1CCCN1	C4H9N						71.12	Low	No	No	0	3	0	0	3	0.55	0	0	1
IMPPAT	Carpaine	Molecule 206	O=C1CCCCCCC[C@@H]2CC[C@@H]([C@@H](N2)C)OC(=O)CCCCCCC[C@@H]2CC[C@H](O1)[C@H](C)N2	C28H50N2O4						478.71	High	No	Yes	0	2	0	0	1	0.55	0	1	2
IMPPAT	Choline	Molecule 207	OCC[N+](C)(C)C	C5H14NO+						104.17	Low	No	No	0	2	0	0	1	0.55	0	1	1
IMPPAT	Methyl protodioscin	Molecule 208	OCC1OC(OC2CCC3(C(=CCC4C3CCC3(C4CC4C3C(C)C(O4)(OC)CCC(COC3OC(CO)C(C(C3O)O)O)C)C)C2)C)C(C(C1OC1OC(C)C(C(C1O)O)O)O)OC1OC(C)C(C(C1O)O)O	C52H86O22						1063.23	Low	No	Yes	3	4	2	1	5	0.17	0	1	2
IMPPAT	Trigraecum	Molecule 209	COc1cc2c(=O)cc(oc2cc1O)c1ccccc1	C16H12O4						268.26	High	Yes	No	0	0	0	0	0	0.55	0	0	1
IMPPAT	Trigoneoside Xb	Molecule 211	OC[C@H]1O[C@@H](OC2CC3CCC4C(C3(CC2O)C)CCC2(C4CC3C2C(C(O3)(O)CCC(CO[C@@H]2O[C@H](CO)[C@H]([C@@H]([C@H]2O)O)O)C)C)C)[C@@H]([C@H]([C@@H]1O)O)O[C@@H]1O[C@@H](C)[C@@H]([C@H]([C@H]1O)O)O	C45H76O19						921.07	Low	No	Yes	3	4	2	1	5	0.17	0	1	2
IMPPAT	Trigoneoside XIIIa	Molecule 212	OCC1OC(OC2CCC3(C(=CCC4C3CCC3(C4CC4C3C(C)C(O4)(O)CCC(COC3OC(CO)C(C(C3O)O)O)C)C)C2)C)C(C(C1OC1OC(CO)C(C(C1O)OC1OC(CO)C(C(C1O)O)O)O)O)OC1OC(C)C(C(C1O)O)O	C57H94O28						1227.34	Low	No	Yes	3	4	2	1	7	0.17	0	1	2
IMPPAT	4-Hydroxycinnamic acid	Molecule 213	OC(=O)/C=C/c1ccc(cc1)O	C9H8O3						164.16	High	Yes	No	0	0	0	0	1	0.85	0	1	1
IMPPAT	Flavanone	Molecule 214	O=C1CC(Oc2c1cccc2)c1ccccc1	C15H12O2						224.25	High	Yes	No	0	0	0	0	0	0.55	0	0	1
IMPPAT	Glyceryl palmitate	Molecule 215	CCCCCCCCCCCCCCCC(=O)OCC(CO)O	C19H38O4						330.5	High	Yes	Yes	0	0	1	0	2	0.55	0	0	2
IMPPAT	Mimosine	Molecule 216	OC(=O)C(Cn1ccc(=O)c(c1)O)N	C8H10N2O4						198.18	High	No	No	0	1	0	0	2	0.55	0	0	1
IMPPAT	gomisin N	Molecule 217	COc1cc2C[C@@H](C)[C@@H](C)Cc3c(c2c(c1OC)OC)c(OC)c1c(c3)OCO1	C23H28O6						400.46	High	Yes	No	0	0	0	0	1	0.55	0	0	2
pubchem	7-(4-hydroxyphenyl)-[1,3]dioxolo[4,5-g][1]benzopyran-8-one	Molecule 89	Oc1ccc(cc1)c1coc2c(c1=O)cc1c(c2)OCO1	C16H10O5	Inactive	Active	Active	Inactive	Inactive	282.25	High	Yes	No	0	0	0	0	0	0.55	0	0	0
pubchem	5,7-dihydroxy-3-(4-hydroxy-3,5-dimethoxyphenyl)-1-benzopyran-4-one	Molecule 105	COc1cc(cc(c1O)OC)c1coc2c(c1=O)c(O)cc(c2)O	C17H14O7	Inactive	Inactive	Active	Inactive	Inactive	330.29	High	No	No	0	0	0	0	0	0.55	0	0	0
IMPPAT	Falcarindiol	Molecule 220	CCCCCCCC=C[C@@H](C#CC#C[C@@H](C=C)O)O	C17H24O2						260.37	High	Yes	No	0	0	0	0	0	0.55	0	2	2
IMPPAT	3-Amino-4,5-dimethyl-2(5H)-furanone	Molecule 221	CC1OC(=O)C(=C1C)N	C6H9NO2						127.14	High	No	No	0	3	0	0	1	0.55	0	0	1
IMPPAT	2,3-Butanedione	Molecule 222	CC(=O)C(=O)C	C4H6O2						86.09	High	No	No	0	3	0	0	2	0.55	1	1	1
IMPPAT	4-Methylumbelliferyl acetate	Molecule 223	CC(=O)Oc1ccc2c(c1)oc(=O)cc2C	C12H10O4						218.21	High	Yes	No	0	0	0	0	0	0.55	0	2	1
IMPPAT	Liquiritigenin	Molecule 162	Oc1ccc(cc1)[C@@H]1CC(=O)c2c(O1)cc(cc2)O	C15H12O4	Inactive	Active	Inactive	Inactive	Inactive	256.25	High	Yes	Yes	0	0	0	0	0	0.55	0	0	0
IMPPAT	Isopropyl alcohol	Molecule 225	CC(O)C	C3H8O						60.1	High	No	No	0	3	0	0	3	0.55	0	0	1
TCMSP	Trochol	Molecule 226	OCC12CCC(C2C2C(CC1)(C)C1(C)CCC3C(C1CC2)(C)CCC(C3(C)C)O)C(=C)C	C30H50O2						442.72	Low	No	No	1	3	0	1	1	0.55	0	1	2
IMPPAT	Isoliquiritigenin	Molecule 172	Oc1ccc(cc1)/C=C/C(=O)c1ccc(cc1O)O	C15H12O4	Inactive	Inactive	Active	Inactive	Inactive	256.25	High	Yes	No	0	0	0	0	0	0.55	0	1	0
TCMSP	Mairin	Molecule 228	CC(=C)C1CCC2(C1C1CCC3C(C1(C)CC2)(C)CCC1C3(C)CCC(C1(C)C)O)C(=O)O	C30H48O3						456.7	Low	No	No	1	3	0	1	1	0.85	0	1	2
TCMSP	Scopolin	Molecule 229	OCC1OC(Oc2cc3oc(=O)ccc3cc2OC)C(C(C1O)O)O	C16H18O9						354.31	Low	No	No	0	1	0	1	0	0.55	0	1	1
TCMSP	Gentianol	Molecule 230	CC(c1cncc2c1CCOC2=O)O	C10H11NO3						193.2	High	No	No	0	0	0	0	1	0.55	0	0	1
TCMSP	Thiarubrine A	Molecule 231	CC#CC1=CC=C(SS1)C#CC#CC=C	C13H8S2						228.33	High	Yes	No	0	0	0	0	0	0.55	0	2	2
TCMSP	lupeol	Molecule 233	CC(=C)C1CCC2(C1C1CCC3C(C1(C)CC2)(C)CCC1C3(C)CCC(C1(C)C)O)C	C30H50O						426.72	Low	No	No	1	3	0	1	2	0.55	0	1	2
TCMSP	Sitogluside	Molecule 234	CCC(C(C)C)CCC(C1CCC2C1(C)CCC1C2CC=C2C1(C)CCC(C2)OC1OC(CO)C(C(C1O)O)O)C	C35H60O6						576.85	Low	No	No	1	4	0	0	1	0.55	0	1	3
TCMSP	Soyasapogenol B	Molecule 235	OCC1(C)C(O)CCC2(C1CCC1(C2CC=C2C1(C)CCC1(C2CC(CC1O)(C)C)C)C)C	C30H50O3						458.72	High	No	No	1	3	0	1	1	0.55	0	1	2
TCMSP	7alpha,21S,25-Trihydroxy-3beta-acetoxy-21S,23R-epoxy-9(11)-en-dammarane	Molecule 236	CC(=O)O[C@H]1CC[C@]2([C@@H](C1(C)C)CC([C@@]1(C2=CC[C@H]2[C@@]1(C)CC[C@@H]2[C@H]1C[C@@H](O[C@@H]1O)CC(O)(C)C)C)O)C	C32H52O6						532.75	High	No	Yes	1	3	0	0	1	0.55	0	1	2
TCMSP	Soyasaponin I	Molecule 237	OCC1OC(OC2C(OC(C(C2O)O)C(=O)O)OC2CCC3(C(C2(C)CO)CCC2(C3CC=C3C2(C)CCC2(C3CC(C)(C)CC2O)C)C)C)C(C(C1O)O)OC1OC(C)C(C(C1O)O)O	C48H78O18						943.12	Low	No	Yes	3	3	1	1	5	0.11	0	2	2
TCMSP	Scopoletol	Molecule 238	COc1cc2ccc(=O)oc2cc1O	C10H8O4						192.17	High	Yes	No	0	0	0	0	1	0.55	0	1	1
IMPPAT	Quercetin	Molecule 218	Oc1cc(O)c2c(c1)oc(c(c2=O)O)c1ccc(c(c1)O)O	C15H10O7	Inactive	Active	Inactive	Active	Inactive	302.24	High	No	No	0	0	0	0	0	0.55	1	1	0
TCMSP	brevifolin	Molecule 240	COc1cc(OC)cc(c1C(=O)C)O	C10H12O4						196.2	High	Yes	No	0	0	0	0	1	0.55	0	0	1
IMPPAT	Apigenin	Molecule 219	Oc1ccc(cc1)c1cc(=O)c2c(o1)cc(cc2O)O	C15H10O5	Inactive	Inactive	Inactive	Inactive	Active	270.24	High	No	No	0	0	0	0	0	0.55	0	0	0
TCMSP	gallic acid-3-O-(6'-O-galloyl)-glucoside	Molecule 242	O[C@@H]1[C@@H](O)[C@@H](COC(=O)c2cc(O)c(c(c2)O)O)O[C@@H]([C@@H]1O)Oc1cc(cc(c1O)O)C(=O)O	C20H20O14						484.36	Low	No	No	2	2	1	1	3	0.11	1	1	1
TCMSP	(25R)-Spirost-5-en-3β-ol acetate	Molecule 243	C[C@@H]1CC[C@@]2(OC1)O[C@@H]1[C@H]([C@H]2C)[C@@]2([C@H](C1)[C@H]1CC=C3[C@]([C@@H]1CC2)(C)CC[C@@H](C3)OC(=O)C)C	C29H44O4						456.66	High	No	No	1	3	0	1	1	0.55	0	1	2
TCMSP	1-PENTANOL,2-METHYL	Molecule 244	CCCC(CO)C	C6H14O						102.17	High	Yes	No	0	2	0	0	2	0.55	0	0	1
TCMSP	Gitonin	Molecule 245	OCC1OC(OC2CC3CCC4C(C3(CC2O)C)CCC2(C4CC3C2C(C2(O3)CCC(CO2)C)C)C)C(C(C1OC1OC(CO)C(C(C1OC1OC(CO)C(C(C1O)O)O)OC1OCC(C(C1O)O)O)O)O)O	C50H82O23						1051.17	Low	No	Yes	3	4	2	1	5	0.17	0	1	2
TCMSP	Hiyodorilactone A	Molecule 246	OCC=C(C(=O)OC1CC(=CCC(C(=CC2C1C(=C)C(=O)O2)C)OC(=O)C)C)CO	C22H28O8						420.45	High	No	No	0	0	0	0	0	0.55	0	3	1
IMPPAT	Naringetol	Molecule 224	Oc1ccc(cc1)[C@@H]1CC(=O)c2c(O1)cc(cc2O)O	C15H12O5	Inactive	Inactive	Inactive	Inactive	Active	272.25	High	No	Yes	0	0	0	0	0	0.55	0	0	0
TCMSP	Schisandrol	Molecule 248	COc1c(O)cc2c(c1OC)c1c(cc(c(c1OC)OC)O)C[C@@H]([C@](C2)(C)O)C	C22H28O7						404.45	High	No	Yes	0	0	0	0	0	0.55	0	0	1
TCMSP	Tigogenone	Molecule 249	CC1CCC2(OC1)OC1C(C2C)C2(C(C1)C1CCC3C(C1CC2)(C)CCC(=O)C3)C	C27H42O3						414.62	High	No	No	1	2	0	1	1	0.55	0	0	2
TCMSP	Tricornine	Molecule 250	COC1C2C3(CCC(C42C(C1(O)C1(O)CC(C2CC4C1C2OC)OC)N(C3)CC)OC)COC(=O)C	C27H43NO8						509.63	High	No	Yes	1	3	0	0	0	0.55	0	0	2
TCMSP	5,7-dihydroxy-2-(4-hydroxyphenyl)-6-methyl-8-((2S,3R,4R,5S,6R)-3,4,5-trihydroxy-6-(hydroxymethyl)tetrahydro-2H-pyran-2-yl)-4H-chromen-4-one	Molecule 251	OC[C@H]1O[C@H]([C@@H]([C@H]([C@@H]1O)O)O)c1c(O)c(C)c(c2c1oc(cc2=O)c1ccc(cc1)O)O	C22H22O10						446.4	Low	No	No	1	0	1	1	2	0.55	0	0	1
TCMSP	Vitexin-7-glucoside	Molecule 252	OCC1OC(C(C(C1O)O)O)c1c(OC2OC(CO)C(C(C2O)O)O)cc(c2c1oc(cc2=O)c1ccc(cc1)O)O	C27H30O15						594.52	Low	No	Yes	3	4	1	1	3	0.17	0	0	1
TCMSP	Vitexin-7-glucoside_qt	Molecule 253	OC[C@@H]1O[C@@H]([C@H]([C@@H]([C@H]1O)O)O)c1c(O)cc(c2c1oc(cc2=O)c1ccc(cc1)O)O	C21H20O10						432.38	Low	No	No	1	0	1	1	2	0.55	0	0	1
TCMSP	Vitisin C	Molecule 254	Oc1ccc(cc1)C1Oc2c(C1c1cc(O)cc3c1C(c1cc(O)cc(c1)O)C(O3)c1ccc(cc1)O)cc(cc2)C=Cc1cc(O)cc2c1C(c1cc(O)cc(c1)O)C(O2)c1ccc(cc1)O	C56H42O12						906.93	Low	No	Yes	3	4	1	2	6	0.17	0	1	3
TCMSP	apigenin-6-xyloside-8-glucoside	Molecule 255	OC[C@H]1O[C@@H](Oc2c(O)c(O[C@@H]3O[C@@H]([C@@H]([C@H]3O)O)CO)c(c3c2oc(cc3=O)c2ccc(cc2)O)O)[C@@H]([C@H]([C@@H]1O)O)O	C26H28O16						596.49	Low	No	Yes	3	3	1	1	3	0.17	0	0	1
TCMSP	gentianine	Molecule 256	C=Cc1cncc2c1CCOC2=O	C10H9NO2						175.18	High	Yes	No	0	0	0	0	1	0.55	0	0	1
TCMSP	9,11-Dimethyl-11-ethyl-10,12-dihydroxy-dodecanoicacid	Molecule 257	CCC(C(C(CCCCCCCC(=O)O)C)O)(CO)C	C16H32O4						288.42	High	Yes	Yes	0	0	1	0	0	0.56	0	0	2
TCMSP	sarsasapogeni	Molecule 258	C[C@H]1CC[C@@]2(OC1)O[C@@H]1[C@H]([C@@H]2C)[C@@]2([C@@H](C1)[C@@H]1CC[C@H]3[C@]([C@H]1CC2)(C)CC[C@H](C3)O)C	C27H44O3						416.64	High	Yes	No	1	2	0	0	1	0.55	0	0	2
TCMSP	sitogenin	Molecule 259	C[C@H]1CC[C@@]2(OC1)O[C@H]1[C@@H]([C@H]2C)[C@@]2([C@@H](C1)[C@H]1CC[C@H]3[C@]([C@@H]1CC2)(C)C[C@H]([C@H](C3)O)O)C	C27H44O4						432.64	High	Yes	Yes	1	1	0	0	1	0.55	0	0	2
TCMSP	Carpesia lactone	Molecule 260	CC1C(=O)OC2C1CCC(C1C2C(=CC1=O)C)C	C15H20O3						248.32	High	Yes	No	0	0	0	0	0	0.55	0	0	1
KNApSAck	L-Histidine	Molecule 261	NC(C(=O)O)Cc1cnc[nH]1	C6H9N3O2						155.15	High	No	No	0	3	0	0	2	0.55	0	0	1
KNApSAck	Methyl protoneodioscin	Molecule 262	OCC1OC(OC2CCC3(C(=CCC4C3CCC3(C4CC4C3C(C)C(O4)(O)CCC(COC3OC(CO)C(C(C3O)O)O)C)C)C2)C)C(C(C1OC1OC(C)C(C(C1O)O)O)O)OC1OC(C)C(C(C1O)O)O	C51H84O22						1049.2	Low	No	Yes	3	4	2	1	5	0.17	0	1	2
KNApSAck	Trigofoenoside C	Molecule 263	OCC1OC(OC2CC3CCC4C(C3(CC2O)C)CCC2(C4CC3C2C(C(O3)(O)CCC(COC2OC(CO)C(C(C2O)O)O)C)C)C)C(C(C1OC1OC(C)C(C(C1O)O)O)O)OC1OC(C)C(C(C1O)O)O	C51H86O23						1067.21	Low	No	Yes	3	4	2	1	5	0.17	0	1	2
KNApSAck	Protoneodioscin	Molecule 265	OCC1OC(O[C@H]2CC[C@]3(C(=CC[C@@H]4[C@@H]3CC[C@]3([C@H]4C[C@H]4[C@@H]3[C@H](C)[C@@](O4)(O)CC[C@@H](COC3OC(CO)C(C(C3O)O)O)C)C)C2)C)C(C(C1OC1OC(C)C(C(C1O)O)O)O)OC1OC(C)C(C(C1O)O)O	C51H84O22						1049.2	Low	No	Yes	3	4	2	1	5	0.17	0	1	2
KNApSAck	Trigoneoside XIb	Molecule 266	OCC1OC(OC2CC3CCC4C(C3(CC2O)C)CCC2(C4CC3C2C(C(O3)(O)CCC(COC2OC(CO)C(C(C2O)O)O)C)C)C)C(C(C1O)O)OC1OCC(C(C1O)O)O	C44H74O19						907.05	Low	No	Yes	3	4	2	1	5	0.17	0	1	2
KNApSAck	Trigoneoside VIII	Molecule 267	OCC1OC(OCC(CCC2=C(C)C3C(O2)CC2C3(C)CCC3C2CCC2C3(C)CC(C(C2)OC2OC(COC3OCC(C(C3O)O)O)C(C(C2O)O)O)O)C)C(C(C1O)O)O	C44H72O18						889.03	Low	No	Yes	3	4	2	1	5	0.17	0	1	2
KNApSAck	Diosgenin 3-O-beta-D-glucopyranoside	Molecule 269	OC[C@H]1O[C@@H](O[C@H]2CC[C@]3(C(=CC[C@@H]4[C@@H]3CC[C@]3([C@H]4C[C@H]4[C@@H]3[C@H](C)[C@]3(O4)CC[C@H](CO3)C)C)C2)C)[C@@H]([C@H]([C@@H]1O)O)O	C33H52O8						576.76	High	No	Yes	1	3	0	0	0	0.55	0	1	2
KNApSAck	Vitexin-2-O-p-coumarate	Molecule 271	OC[C@H]1O[C@H]([C@@H]([C@H]([C@@H]1O)O)OC(=O)/C=C/c1ccc(cc1)O)c1c(O)cc(c2c1oc(cc2=O)c1ccc(cc1)O)O	C30H26O12						578.52	Low	No	No	3	2	1	1	3	0.17	0	1	1
KNApSAck	delta3,5-Deoxyneotigogenin	Molecule 272	C[C@H]1CC[C@@]2(OC1)O[C@@H]1[C@H]([C@@H]2C)[C@@]2([C@@H](C1)[C@@H]1CC=C3[C@]([C@H]1CC2)(C)CCC=C3)C	C27H40O2						396.61	Low	No	No	1	1	0	1	1	0.55	0	0	2
KNApSAck	Kaempferol 3,7-O-beta-D-diglucopyranoside	Molecule 273	OC[C@H]1O[C@@H](Oc2cc(O)c3c(c2)oc(c(c3=O)O[C@@H]2O[C@H](CO)[C@H]([C@H]([C@H]2O)O)O)c2ccc(cc2)O)[C@@H]([C@H]([C@@H]1O)O)O	C27H30O16						610.52	Low	No	Yes	3	4	1	1	4	0.17	0	0	1
KNApSAck	6,8-Di-C-galactopyranosylapigenin	Molecule 274	OC[C@@H]1O[C@H]([C@@H]([C@H]([C@H]1O)O)O)c1c(O)c([C@@H]2O[C@@H](CO)[C@@H]([C@@H]([C@H]2O)O)O)c(c2c1oc(cc2=O)c1ccc(cc1)O)O	C27H30O15						594.52	Low	No	No	3	4	1	1	4	0.17	0	0	1
KNApSAck	Vicenin II	Molecule 275	OC[C@@H]1O[C@H]([C@H]([C@H]([C@@H]1O)O)O)c1c(O)c([C@@H]2O[C@@H](CO)[C@H]([C@@H]([C@H]2O)O)O)c(c2c1oc(cc2=O)c1ccc(cc1)O)O	C27H30O15						594.52	Low	No	No	3	4	1	1	4	0.17	0	0	1
KNApSAck	8-Galactopyranosyl-6-quinovopyranosylapigenin	Molecule 276	OC[C@H]1O[C@H]([C@@H]([C@H]([C@H]1O)O)O)c1c(O)c([C@@H]2O[C@H](C)[C@H]([C@@H]([C@H]2O)O)O)c(c2c1oc(cc2=O)c1ccc(cc1)O)O	C27H30O14						578.52	Low	No	Yes	3	4	1	1	3	0.17	0	0	1
KNApSAck	Amurensin	Molecule 277	OC[C@@H]1O[C@@H](Oc2cc(O)c3c(c2CCC(O)(C)C)oc(c(c3=O)O)c2ccc(cc2)O)[C@@H]([C@H]([C@@H]1O)O)O	C26H30O12						534.51	Low	No	Yes	3	2	1	1	3	0.17	0	0	1
KNApSAck	Vicenin 3	Molecule 278	OC[C@H]1O[C@H]([C@@H]([C@H]([C@@H]1O)O)O)c1c(O)c([C@H]2OC[C@H]([C@H]([C@H]2O)O)O)c2c(c1O)c(=O)cc(o2)c1ccc(cc1)O	C26H28O14						564.49	Low	No	Yes	3	3	1	1	4	0.17	0	0	1
KNApSAck	Schisandrol A	Molecule 279	COc1c(OC)cc2c(c1OC)c1c(cc(c(c1OC)OC)OC)C[C@@H]([C@@](C2)(C)O)C	C24H32O7						432.51	High	Yes	No	0	0	0	0	0	0.55	0	0	2
KNApSAck	Rhaponticin	Molecule 280	OC[C@@H]1O[C@@H](Oc2cc(/C=C/c3ccc(c(c3)O)OC)cc(c2)O)[C@H]([C@H]([C@@H]1O)O)O	C21H24O9						420.41	Low	No	Yes	1	0	1	1	1	0.55	0	1	1
KNApSAck	Orientin	Molecule 281	OC[C@@H]1O[C@H]([C@@H]([C@H]([C@@H]1O)O)O)c1c(O)cc(c2c1oc(cc2=O)c1ccc(c(c1)O)O)O	C21H20O11						448.38	Low	No	No	2	1	1	1	3	0.17	1	1	1
KNApSAck	Cosmosiin	Molecule 282	OC[C@H]1O[C@@H](Oc2cc(O)c3c(c2)oc(cc3=O)c2ccc(cc2)O)[C@@H]([C@H]([C@@H]1O)O)O	C21H20O10						432.38	Low	No	Yes	1	0	1	1	2	0.55	0	0	1
TCMSP	Nortangeretin	Molecule 239	Oc1ccc(cc1)c1cc(=O)c2c(o1)c(O)c(c(c2O)O)O	C15H10O7	Inactive	Active	Inactive	Active	Inactive	302.24	High	No	No	0	0	0	0	0	0.55	1	2	0
KNApSAck	Melatonin	Molecule 284	COc1ccc2c(c1)c(CCNC(=O)C)c[nH]2	C13H16N2O2						232.28	High	Yes	No	0	0	0	0	0	0.55	0	0	1
KNApSAck	4-O-beta-D-Mannopyranosyl-D-mannose	Molecule 285	OC[C@H]([C@H]([C@@H]([C@@H](C=O)O)O)O[C@@H]1O[C@H](CO)[C@H]([C@@H]([C@@H]1O)O)O)O	C12H22O11						342.3	Low	No	Yes	2	1	1	1	4	0.17	0	1	1
KNApSAck	Isorhamnetin	Molecule 283	COc1ccc(cc1O)c1oc2cc(O)cc(c2c(=O)c1O)O	C16H12O7	Inactive	Inactive	Active	Inactive	Inactive	316.26	High	No	No	0	0	0	0	0	0.55	0	0	0

## Sheet: S2
Molecule	Uniprot ID	Common name
7,4'-Dihydroxyflavone	P11511	CYP19A1
7,4'-Dihydroxyflavone	Q9H2K2	TNKS2
7,4'-Dihydroxyflavone	O95271	TNKS
7,4'-Dihydroxyflavone	O43570	CA12
7,4'-Dihydroxyflavone	P03372	ESR1
7,4'-Dihydroxyflavone	Q92731	ESR2
7,4'-Dihydroxyflavone	P09874	PARP1
Daidzein	P05091	ALDH2
Daidzein	P43166	CA7
Daidzein	P22748	CA4
Daidzein	P24557	TBXAS1
Daidzein	P21397	MAOA
Daidzein	P00533	EGFR
Daidzein	O43451	MGAM
Daidzein	P28223	HTR2A
Daidzein	P28335	HTR2C
Daidzein	P30542	ADORA1
Daidzein	P29274	ADORA2A
Daidzein	P14061	HSD17B1
Daidzein	P11474	ESRRA
Daidzein	O95718	ESRRB
Daidzein	Q9UNQ0	ABCG2
Kaempferol	Q9NPH5	NOX4
Kaempferol	P15121	AKR1B1
Kaempferol	P47989	XDH
Kaempferol	P14679	TYR
Kaempferol	P36888	FLT3
Kaempferol	P00918	CA2
Kaempferol	P09917	ALOX5
Kaempferol	P37059	HSD17B2
Kaempferol	P33527	ABCC1
Kaempferol	P35869	AHR
Kaempferol	P08183	ABCB1
Kaempferol	Q16678	CYP1B1
Kaempferol	P22303	ACHE
Kaempferol	Q04760	GLO1
Kaempferol	P43405	SYK
Kaempferol	P49841	GSK3B
Kaempferol	P14780	MMP9
Kaempferol	P08253	MMP2
Kaempferol	P16050	ALOX15
Kaempferol	P18054	ALOX12
Kaempferol	Q13332	PTPRS
Kaempferol	Q15078	CDK5R1
Kaempferol	Q00535	CDK5
Kaempferol	Q8WWL7	CCNB3
Kaempferol	P06493	CDK1
Kaempferol	P14635	CCNB1
Kaempferol	O95067	CCNB2
Kaempferol	P05089	ARG1
Kaempferol	Q9HC97	GPR35
Kaempferol	P53355	DAPK1
Kaempferol	P29372	MPG
Kaempferol	Q96S37	SLC22A12
olmelin	P16152	CBR1
3',5,7-trihydroxy-5'-methoxyisoflavone	Q16539	MAPK14
3',5,7-trihydroxy-5'-methoxyisoflavone	P11309	PIM1
3',5,7-trihydroxy-5'-methoxyisoflavone	P35968	KDR
3',5,7-trihydroxy-5'-methoxyisoflavone	P53779	MAPK10
3',5,7-trihydroxy-5'-methoxyisoflavone	P24941	CDK2
3',5,7-trihydroxy-5'-methoxyisoflavone	P06401	PGR
3',5,7-trihydroxy-5'-methoxyisoflavone	P19793	RXRA
3',5,7-trihydroxy-5'-methoxyisoflavone	P15559	NQO1
3',5,7-trihydroxy-5'-methoxyisoflavone	P14174	MIF
3',5,7-trihydroxy-5'-methoxyisoflavone	Q08499	PDE4D
3',5,7-trihydroxy-5'-methoxyisoflavone	P00439	PAH
3',5,7-trihydroxy-5'-methoxyisoflavone	P78368	CSNK1G2
3',5,7-trihydroxy-5'-methoxyisoflavone	P03950	ANG
3',5,7-trihydroxy-5'-methoxyisoflavone	P07900	HSP90AA1
3',5,7-trihydroxy-5'-methoxyisoflavone	Q06520	SULT2A1
3',5,7-trihydroxy-5'-methoxyisoflavone	Q02127	DHODH
3',5,7-trihydroxy-5'-methoxyisoflavone	P35558	PCK1
3',5,7-trihydroxy-5'-methoxyisoflavone	P08235	NR3C2
3',5,7-trihydroxy-5'-methoxyisoflavone	P08709	F7
3',5,7-trihydroxy-5'-methoxyisoflavone	P54577	YARS1
3',5,7-trihydroxy-5'-methoxyisoflavone	P04062	GBA
3',5,7-trihydroxy-5'-methoxyisoflavone	P12931	SRC
3',5,7-trihydroxy-5'-methoxyisoflavone	O76074	PDE5A
3',5,7-trihydroxy-5'-methoxyisoflavone	P34896	SHMT1
3',5,7-trihydroxy-5'-methoxyisoflavone	P11712	CYP2C9
3',5,7-trihydroxy-5'-methoxyisoflavone	Q96RI1	NR1H4
3',5,7-trihydroxy-5'-methoxyisoflavone	O75469	NR1I2
3',5,7-trihydroxy-5'-methoxyisoflavone	P18031	PTPN1
3',5,7-trihydroxy-5'-methoxyisoflavone	P00742	F10
3',5,7-trihydroxy-5'-methoxyisoflavone	P62942	FKBP1A
3',5,7-trihydroxy-5'-methoxyisoflavone	Q9BZX2	UCK2
3',5,7-trihydroxy-5'-methoxyisoflavone	P06744	GPI
3',5,7-trihydroxy-5'-methoxyisoflavone	P06730	EIF4E
3',5,7-trihydroxy-5'-methoxyisoflavone	P01112	HRAS
3',5,7-trihydroxy-5'-methoxyisoflavone	P23919	DTYMK
3',5,7-trihydroxy-5'-methoxyisoflavone	P28161	GSTM2
3',5,7-trihydroxy-5'-methoxyisoflavone	Q92831	KAT2B
3',5,7-trihydroxy-5'-methoxyisoflavone	Q8IV48	ERI1
3',5,7-trihydroxy-5'-methoxyisoflavone	P22102	GART
3',5,7-trihydroxy-5'-methoxyisoflavone	Q16836	HADH
3',5,7-trihydroxy-5'-methoxyisoflavone	Q16222	UAP1
7,4'-Dihydroxyflavone	P03372	ESR1
7,4'-Dihydroxyflavone	P00390	GSR
7,4'-Dihydroxyflavone	Q92731	ESR2
7,4'-Dihydroxyflavone	P10275	AR
7,4'-Dihydroxyflavone	Q00534	CDK6
7,4'-Dihydroxyflavone	P15559	NQO1
7,4'-Dihydroxyflavone	P03950	ANG
7,4'-Dihydroxyflavone	P12931	SRC
7,4'-Dihydroxyflavone	P04179	SOD2
7,4'-Dihydroxyflavone	P27707	DCK
7,4'-Dihydroxyflavone	P05091	ALDH2
7,4'-Dihydroxyflavone	P52732	KIF11
7,4'-Dihydroxyflavone	P04278	SHBG
7,4'-Dihydroxyflavone	P78536	ADAM17
7,4'-Dihydroxyflavone	O60563	CCNT1
7,4'-Dihydroxyflavone	Q15303	ERBB4
7,4'-Dihydroxyflavone	P00742	F10
7,4'-Dihydroxyflavone	P16442	ABO
7,4'-Dihydroxyflavone	P06213	INSR
7,4'-Dihydroxyflavone	P07686	HEXB
7,4'-Dihydroxyflavone	P08246	ELANE
7,4'-Dihydroxyflavone	P98170	XIAP
7,4'-Dihydroxyflavone	P00517	PRKACA
7,4'-Dihydroxyflavone	P42574	CASP3
7,4'-Dihydroxyflavone	P00797	REN
Daidzein	P45452	MMP13
Daidzein	P00734	F2
Daidzein	P22894	MMP8
Daidzein	P49354	FNTA
Daidzein	P62508	ESRRG
Daidzein	P45983	MAPK8
Daidzein	P35557	GCK
Daidzein	P06744	GPI
Daidzein	Q92947	GCDH
Kaempferol	P00734	F2
Kaempferol	P08631	HCK
Kaempferol	P06276	BCHE
Kaempferol	P00751	CFB
Kaempferol	P11142	HSPA8
Kaempferol	Q62986	Esr2
Kaempferol	O15530	PDPK1
Kaempferol	P06737	PYGL
Kaempferol	P00736	C1R
Kaempferol	Q9UKM7	MAN1B1
Kaempferol	P05451	REG1A
Kaempferol	Q02127	DHODH
Kaempferol	P04818	TYMS
Kaempferol	P11766	ADH5
Kaempferol	P06239	LCK
Kaempferol	P32589	SSE1
Kaempferol	P42330	AKR1C3
Kaempferol	O60674	JAK2
Kaempferol	P0DUB6	AMY1A
Kaempferol	P00519	ABL1
Kaempferol	P11310	ACADM
Kaempferol	Q96CA5	BIRC7
Kaempferol	P24752	ACAT1
Kaempferol	P61587	RND3
Kaempferol	Q9P2T1	GMPR2
Kaempferol	P36959	GMPR
Kaempferol	Q00688	FKBP3
tricin	P18075	BMP7
tricin	Q00796	SORD
tricin	P34913	EPHX2
tricin	Q04828	AKR1C1
tricin	P27487	DPP4
tricin	P15289	ARSA
tricin	P15309	ACP3
tricin	Q9P2W7	B3GAT1
tricin	Q9HAN9	NMNAT1
tricin	P49759	CLK1
tricin	P43235	CTSK
tricin	P08473	MME
tricin	Q9Y689	ARL5A
tricin	P29466	CASP1
tricin	Q9NNX6	CD209
tricin	P36959	GMPR
tricin	O43708	GSTZ1
tricin	Q00688	FKBP3
olmelin	P00918	CA2
olmelin	P06276	BCHE
olmelin	P11362	FGFR1
olmelin	P56817	BACE1
olmelin	P02766	TTR
olmelin	P35221	CTNNA1
olmelin	P08254	MMP3
olmelin	P15090	FABP4
olmelin	P49789	FHIT
olmelin	P50613	CDK7
olmelin	P20231	TPSB2
5,7,3'-Trihydroxy-5'-methylisoflavone	P28482	MAPK1
5,7,3'-Trihydroxy-5'-methylisoflavone	P08758	ANXA5
5,7,3'-Trihydroxy-5'-methylisoflavone	P14174	MIF
5,7,3'-Trihydroxy-5'-methylisoflavone	P22894	MMP8
5,7,3'-Trihydroxy-5'-methylisoflavone	Q06124	PTPN11
5,7,3'-Trihydroxy-5'-methylisoflavone	P07900	HSP90AA1
5,7,3'-Trihydroxy-5'-methylisoflavone	O76054	SEC14L2
5,7,3'-Trihydroxy-5'-methylisoflavone	P42768	WAS
5,7,3'-Trihydroxy-5'-methylisoflavone	P52333	JAK3
5,7,3'-Trihydroxy-5'-methylisoflavone	P05981	HPN
5,7,3'-Trihydroxy-5'-methylisoflavone	P27707	DCK
5,7,3'-Trihydroxy-5'-methylisoflavone	O43617	TRAPPC3
5,7,3'-Trihydroxy-5'-methylisoflavone	P43403	ZAP70
5,7,3'-Trihydroxy-5'-methylisoflavone	P02753	RBP4
5,7,3'-Trihydroxy-5'-methylisoflavone	P49137	MAPKAPK2
5,7,3'-Trihydroxy-5'-methylisoflavone	P10276	RARA
Thiamine	P09960	LTA4H
Thiamine	P29474	NOS3
Thiamine	P35398	RORA
Thiamine	P27338	MAOB
Thiamine	O15496	PLA2G10
Thiamine	P49763	PGF
Thiamine	P10828	THRB
Thiamine	P08581	MET
Thiamine	P08263	GSTA1
Thiamine	P55055	NR1H2
Thiamine	P31751	AKT2
Thiamine	P37231	PPARG
Thiamine	P11473	VDR
Thiamine	P29317	EPHA2
Thiamine	P04150	NR3C1
Thiamine	P04035	HMGCR
Thiamine	P60568	IL2
Thiamine	P13631	RARG
Thiamine	Q02750	MAP2K1
Thiamine	P08238	HSP90AB1
Thiamine	Q13231	CHIT1
Thiamine	P11086	PNMT

## Sheet: S3
The molecular docking grid parameters
Targets	PDB ID
EGFR	6S9C	center_x =	-24.618
		center_y =	-58.533
		center_z =	-7.704
		size_x =	83
		size_y =	60
		size_z =	81
HRAS	7DPJ	center_x =	-2.221
		center_y =	-21.046
		center_z =	-28.214
		size_x =	54
		size_y =	58
		size_z =	51
MAPK1	4ZZN	center_x =	-3.283
		center_y =	8.211
		center_z =	47.315
		size_x =	76
		size_y =	59
		size_z =	82
SRC	2SRC	center_x =	20.587
		center_y =	33.76
		center_z =	67.439
		size_x =	78
		size_y =	83
		size_z =	76

## Sheet: S4
			Protein	PDB Id
			HRAS	7DPJ
			EGFR	6S9C
			SRC	2SRC
			MAPK1	4ZZN
			InstaDock					CB-Dock
HRAS	7DPJ	Name of the ligand	Binding Free Energy (kcal/mol)	pKi	Ligand Efficiency (kcal/mol/non-H atom)	Torsional Energy	Name of the ligand	Binding Free Energy (kcal/mol)
		7,4'-Dihydroxyflavone	-8.7	6.38	0.4579	0.9339	7,4'-Dihydroxyflavone	-8.6
		Kaempferol	-8.5	6.23	0.4048	1.5565	tricin	-8.6
		tricin	-8.4	6.16	0.35	1.8678	Kaempferol	-8.5
		5,7,3'-Trihydroxy-5'-methylisoflavone	-7.7	5.65	0.3667	1.2452	5,7,3'-Trihydroxy-5'-methylisoflavone	-8
		3',5,7-trihydroxy-5'-methoxyisoflavone	-7.7	5.65	0.35	1.5565	3',5,7-trihydroxy-5'-methoxyisoflavone	-7.8
		Daidzein	-7.6	5.57	0.4	0.9339	olmelin	-7.7
		olmelin	-7.6	5.57	0.3619	1.2452	Daidzein	-7.6
		Thiamine	-6.5	4.77	0.3611	1.5565	Thiamine	-6.4
EGFR	6S9C	Name of the ligand	Binding Free Energy (kcal/mol)	pKi	Ligand Efficiency (kcal/mol/non-H atom)	Torsional Energy	Name of the ligand	Binding Free Energy (kcal/mol)
		5,7,3'-Trihydroxy-5'-methylisoflavone	-8.9	6.53	0.4238	1.2452	5,7,3'-Trihydroxy-5'-methylisoflavone	-9
		7,4'-Dihydroxyflavone	-8.5	6.23	0.4474	0.9339	3',5,7-trihydroxy-5'-methoxyisoflavone	-8.6
		3',5,7-trihydroxy-5'-methoxyisoflavone	-8.5	6.23	0.3864	1.5565	7,4'-Dihydroxyflavone	-8.6
		olmelin	-8.3	6.09	0.3952	1.2452	Daidzein	-8.4
		Kaempferol	-8.3	6.09	0.3952	1.5565	Kaempferol	-8.3
		Daidzein	-8.1	5.94	0.4263	0.9339	tricin	-8.3
		tricin	-8.1	5.94	0.3375	1.8678	olmelin	-8.3
		Thiamine	-6.1	4.47	0.3389	1.5565	Thiamine	-6.1
SRC	2SRC	Name of the ligand	Binding Free Energy (kcal/mol)	pKi	Ligand Efficiency (kcal/mol/non-H atom)	Torsional Energy	Name of the ligand	Binding Free Energy (kcal/mol)
		3',5,7-trihydroxy-5'-methoxyisoflavone	-9.3	6.82	0.4429	1.2452	3',5,7-trihydroxy-5'-methoxyisoflavone	-9.3
		olmelin	-9.3	6.82	0.4227	1.5565	olmelin	-9.2
		5,7,3'-Trihydroxy-5'-methylisoflavone	-9.2	6.75	0.4381	1.2452	5,7,3'-Trihydroxy-5'-methylisoflavone	-9.2
		Kaempferol	-9	6.6	0.4286	1.5565	Kaempferol	-9
		Daidzein	-8.7	6.38	0.4579	0.9339	Daidzein	-8.8
		7,4'-Dihydroxyflavone	-8.6	6.31	0.4526	0.9339	7,4'-Dihydroxyflavone	-8.5
		tricin	-8.5	6.23	0.3542	1.8678	tricin	-8.4
		Thiamine	-6.7	4.91	0.3722	1.5565	Thiamine	-6.7
MAPK1	4ZZN	Name of the ligand	Binding Free Energy (kcal/mol)	pKi	Ligand Efficiency (kcal/mol/non-H atom)	Torsional Energy	Name of the ligand	Binding Free Energy (kcal/mol)
		5,7,3'-Trihydroxy-5'-methylisoflavone	-7.9	5.79	0.3762	1.2452	3',5,7-trihydroxy-5'-methoxyisoflavone	-8
		tricin	-7.9	5.79	0.3292	1.8678	tricin	-8
		3',5,7-trihydroxy-5'-methoxyisoflavone	-7.8	5.72	0.3545	1.5565	Kaempferol	-7.7
		7,4'-Dihydroxyflavone	-7.7	5.65	0.4053	0.9339	7,4'-Dihydroxyflavone	-7.6
		olmelin	-7.6	5.57	0.3619	1.2452	5,7,3'-Trihydroxy-5'-methylisoflavone	-7.6
		Kaempferol	-7.5	5.5	0.3571	1.5565	Daidzein	-7.4
		Daidzein	-7.4	5.43	0.3895	0.9339	olmelin	-7.3
		Thiamine	-6.5	4.77	0.3611	1.5565	Thiamine	-6.4

## Sheet: GeneCards-SearchResults2
Gene Symbol	Description	Category	Gifts	GC Id	Relevance score	GeneCards Link
FGFR3	Fibroblast Growth Factor Receptor 3	Protein Coding	63	GC04P001795	47.0227	https://www.genecards.org/cgi-bin/carddisp.pl?gene=FGFR3
RB1	RB Transcriptional Corepressor 1	Protein Coding	55	GC13P048303	43.1171	https://www.genecards.org/cgi-bin/carddisp.pl?gene=RB1
HRAS	HRas Proto-Oncogene, GTPase	Protein Coding	59	GC11M004421	39.5649	https://www.genecards.org/cgi-bin/carddisp.pl?gene=HRAS
KRAS	KRAS Proto-Oncogene, GTPase	Protein Coding	59	GC12M025204	37.5086	https://www.genecards.org/cgi-bin/carddisp.pl?gene=KRAS
MIR143	MicroRNA 143	RNA Gene	26	GC05P149414	30.4952	https://www.genecards.org/cgi-bin/carddisp.pl?gene=MIR143
LRRC56	Leucine Rich Repeat Containing 56	Protein Coding	41	GC11P000518	30.4625	https://www.genecards.org/cgi-bin/carddisp.pl?gene=LRRC56
MIR21	MicroRNA 21	RNA Gene	26	GC17P063092	29.93	https://www.genecards.org/cgi-bin/carddisp.pl?gene=MIR21
MIR221	MicroRNA 221	RNA Gene	23	GC0XM045746	29.4211	https://www.genecards.org/cgi-bin/carddisp.pl?gene=MIR221
MIR10B	MicroRNA 10b	RNA Gene	24	GC02P176150	27.8083	https://www.genecards.org/cgi-bin/carddisp.pl?gene=MIR10B
MIR127	MicroRNA 127	RNA Gene	23	GC14P110568	26.6132	https://www.genecards.org/cgi-bin/carddisp.pl?gene=MIR127
BLCAP	BLCAP Apoptosis Inducing Factor	Protein Coding	36	GC20M037492	26.6114	https://www.genecards.org/cgi-bin/carddisp.pl?gene=BLCAP
AATBC	Apoptosis Associated Transcript In Bladder Cancer	RNA Gene	19	GC21M043806	25.9438	https://www.genecards.org/cgi-bin/carddisp.pl?gene=AATBC
BRINP1	BMP/Retinoic Acid Inducible Neural Specific 1	Protein Coding	43	GC09M119153	22.36	https://www.genecards.org/cgi-bin/carddisp.pl?gene=BRINP1
TP53	Tumor Protein P53	Protein Coding	60	GC17M007661	19.1179	https://www.genecards.org/cgi-bin/carddisp.pl?gene=TP53
GSTM1	Glutathione S-Transferase Mu 1	Protein Coding	49	GC01P109687	18.9359	https://www.genecards.org/cgi-bin/carddisp.pl?gene=GSTM1
GCASPC	Gall Bladder Cancer Associated Suppressor Of Pyruvate Carboxylase LncRNA	RNA Gene	6	GC06U903671	18.1833	https://www.genecards.org/cgi-bin/carddisp.pl?gene=GCASPC
GSTT1	Glutathione S-Transferase Theta 1	Protein Coding	38	GC22Mi00270	17.4517	https://www.genecards.org/cgi-bin/carddisp.pl?gene=GSTT1
NAT2	N-Acetyltransferase 2	Protein Coding	47	GC08P018391	15.9415	https://www.genecards.org/cgi-bin/carddisp.pl?gene=NAT2
CCND1	Cyclin D1	Protein Coding	60	GC11P069641	13.9702	https://www.genecards.org/cgi-bin/carddisp.pl?gene=CCND1
CDH1	Cadherin 1	Protein Coding	56	GC16P068737	13.5024	https://www.genecards.org/cgi-bin/carddisp.pl?gene=CDH1
EGFR	Epidermal Growth Factor Receptor	Protein Coding	62	GC07P055019	13.4484	https://www.genecards.org/cgi-bin/carddisp.pl?gene=EGFR
VEGFA	Vascular Endothelial Growth Factor A	Protein Coding	56	GC06P043770	13.4407	https://www.genecards.org/cgi-bin/carddisp.pl?gene=VEGFA
CDKN2A	Cyclin Dependent Kinase Inhibitor 2A	Protein Coding	57	GC09M021967	13.4162	https://www.genecards.org/cgi-bin/carddisp.pl?gene=CDKN2A
CDKN1A	Cyclin Dependent Kinase Inhibitor 1A	Protein Coding	55	GC06P092294	13.1322	https://www.genecards.org/cgi-bin/carddisp.pl?gene=CDKN1A
XRCC1	X-Ray Repair Cross Complementing 1	Protein Coding	51	GC19M043543	13.0829	https://www.genecards.org/cgi-bin/carddisp.pl?gene=XRCC1
ERCC2	ERCC Excision Repair 2, TFIIH Core Complex Helicase Subunit	Protein Coding	53	GC19M045349	12.9823	https://www.genecards.org/cgi-bin/carddisp.pl?gene=ERCC2
BLACAT1	BLACAT1 Overlapping LEMD1 Locus	Protein Coding	15	GC01M205434	12.9352	https://www.genecards.org/cgi-bin/carddisp.pl?gene=BLACAT1
GSTP1	Glutathione S-Transferase Pi 1	Protein Coding	57	GC11P067583	12.7031	https://www.genecards.org/cgi-bin/carddisp.pl?gene=GSTP1
UCA1	Urothelial Cancer Associated 1	RNA Gene	26	GC19P015828	12.561	https://www.genecards.org/cgi-bin/carddisp.pl?gene=UCA1
ERBB2	Erb-B2 Receptor Tyrosine Kinase 2	Protein Coding	62	GC17P039687	12.403	https://www.genecards.org/cgi-bin/carddisp.pl?gene=ERBB2
MDM2	MDM2 Proto-Oncogene	Protein Coding	59	GC12P068808	12.0805	https://www.genecards.org/cgi-bin/carddisp.pl?gene=MDM2
MMP9	Matrix Metallopeptidase 9	Protein Coding	61	GC20P046008	12.0496	https://www.genecards.org/cgi-bin/carddisp.pl?gene=MMP9
TNF	Tumor Necrosis Factor	Protein Coding	59	GC06P092154	11.9342	https://www.genecards.org/cgi-bin/carddisp.pl?gene=TNF
MYC	MYC Proto-Oncogene, BHLH Transcription Factor	Protein Coding	59	GC08P127735	11.8016	https://www.genecards.org/cgi-bin/carddisp.pl?gene=MYC
MMP2	Matrix Metallopeptidase 2	Protein Coding	60	GC16P055390	11.5191	https://www.genecards.org/cgi-bin/carddisp.pl?gene=MMP2
TSC1	TSC Complex Subunit 1	Protein Coding	54	GC09M132891	11.4874	https://www.genecards.org/cgi-bin/carddisp.pl?gene=TSC1
MMP1	Matrix Metallopeptidase 1	Protein Coding	57	GC11M102810	11.4463	https://www.genecards.org/cgi-bin/carddisp.pl?gene=MMP1
NAT1	N-Acetyltransferase 1	Protein Coding	50	GC08P018183	11.3918	https://www.genecards.org/cgi-bin/carddisp.pl?gene=NAT1
SLC35E3	Solute Carrier Family 35 Member E3	Protein Coding	39	GC12P068746	11.2726	https://www.genecards.org/cgi-bin/carddisp.pl?gene=SLC35E3
XRCC3	X-Ray Repair Cross Complementing 3	Protein Coding	50	GC14M103697	11.27	https://www.genecards.org/cgi-bin/carddisp.pl?gene=XRCC3
TBX3	T-Box Transcription Factor 3	Protein Coding	49	GC12M114670	11.2599	https://www.genecards.org/cgi-bin/carddisp.pl?gene=TBX3
RASSF1	Ras Association Domain Family Member 1	Protein Coding	49	GC03M050329	11.1762	https://www.genecards.org/cgi-bin/carddisp.pl?gene=RASSF1
TERT	Telomerase Reverse Transcriptase	Protein Coding	58	GC05M001253	10.9498	https://www.genecards.org/cgi-bin/carddisp.pl?gene=TERT
PTEN	Phosphatase And Tensin Homolog	Protein Coding	59	GC10P094594	10.7402	https://www.genecards.org/cgi-bin/carddisp.pl?gene=PTEN
NQO1	NAD(P)H Quinone Dehydrogenase 1	Protein Coding	55	GC16M069706	10.6642	https://www.genecards.org/cgi-bin/carddisp.pl?gene=NQO1
EGF	Epidermal Growth Factor	Protein Coding	58	GC04P109912	10.6579	https://www.genecards.org/cgi-bin/carddisp.pl?gene=EGF
CXCL8	C-X-C Motif Chemokine Ligand 8	Protein Coding	50	GC04P073740	10.4545	https://www.genecards.org/cgi-bin/carddisp.pl?gene=CXCL8
KIF20B	Kinesin Family Member 20B	Protein Coding	44	GC10P089701	10.3153	https://www.genecards.org/cgi-bin/carddisp.pl?gene=KIF20B
UPK2	Uroplakin 2	Protein Coding	43	GC11P118925	10.2357	https://www.genecards.org/cgi-bin/carddisp.pl?gene=UPK2
CDK4	Cyclin Dependent Kinase 4	Protein Coding	61	GC12M057787	10.1435	https://www.genecards.org/cgi-bin/carddisp.pl?gene=CDK4
AKT1	AKT Serine/Threonine Kinase 1	Protein Coding	61	GC14M104769	10.1181	https://www.genecards.org/cgi-bin/carddisp.pl?gene=AKT1
BIRC5	Baculoviral IAP Repeat Containing 5	Protein Coding	52	GC17P078214	10.1089	https://www.genecards.org/cgi-bin/carddisp.pl?gene=BIRC5
OGG1	8-Oxoguanine DNA Glycosylase	Protein Coding	53	GC03P013609	10.0354	https://www.genecards.org/cgi-bin/carddisp.pl?gene=OGG1
DEPDC1	DEP Domain Containing 1	Protein Coding	41	GC01M068474	10.0011	https://www.genecards.org/cgi-bin/carddisp.pl?gene=DEPDC1
CTNNB1	Catenin Beta 1	Protein Coding	60	GC03P041194	9.99805	https://www.genecards.org/cgi-bin/carddisp.pl?gene=CTNNB1
TYMP	Thymidine Phosphorylase	Protein Coding	54	GC22M050525	9.94714	https://www.genecards.org/cgi-bin/carddisp.pl?gene=TYMP
BCL2	BCL2 Apoptosis Regulator	Protein Coding	57	GC18M063123	9.84748	https://www.genecards.org/cgi-bin/carddisp.pl?gene=BCL2
DAPK1	Death Associated Protein Kinase 1	Protein Coding	56	GC09P087497	9.83424	https://www.genecards.org/cgi-bin/carddisp.pl?gene=DAPK1
PSCA	Prostate Stem Cell Antigen	Protein Coding	46	GC08P142670	9.78877	https://www.genecards.org/cgi-bin/carddisp.pl?gene=PSCA
E2F1	E2F Transcription Factor 1	Protein Coding	50	GC20M033675	9.70361	https://www.genecards.org/cgi-bin/carddisp.pl?gene=E2F1
MUC1	Mucin 1, Cell Surface Associated	Protein Coding	55	GC01M155185	9.67687	https://www.genecards.org/cgi-bin/carddisp.pl?gene=MUC1
MAPK1	Mitogen-Activated Protein Kinase 1	Protein Coding	59	GC22M021759	9.67149	https://www.genecards.org/cgi-bin/carddisp.pl?gene=MAPK1
PRC1	Protein Regulator Of Cytokinesis 1	Protein Coding	47	GC15M090966	9.58881	https://www.genecards.org/cgi-bin/carddisp.pl?gene=PRC1
TP63	Tumor Protein P63	Protein Coding	53	GC03P189598	9.5687	https://www.genecards.org/cgi-bin/carddisp.pl?gene=TP63
AURKA	Aurora Kinase A	Protein Coding	57	GC20M056370	9.54431	https://www.genecards.org/cgi-bin/carddisp.pl?gene=AURKA
NRAS	NRAS Proto-Oncogene, GTPase	Protein Coding	57	GC01M114704	9.52408	https://www.genecards.org/cgi-bin/carddisp.pl?gene=NRAS
APEX1	Apurinic/Apyrimidinic Endodeoxyribonuclease 1	Protein Coding	52	GC14P020455	9.46962	https://www.genecards.org/cgi-bin/carddisp.pl?gene=APEX1
PTGS2	Prostaglandin-Endoperoxide Synthase 2	Protein Coding	56	GC01M186671	9.46256	https://www.genecards.org/cgi-bin/carddisp.pl?gene=PTGS2
THBS1	Thrombospondin 1	Protein Coding	52	GC15P039581	9.44952	https://www.genecards.org/cgi-bin/carddisp.pl?gene=THBS1
H19	H19 Imprinted Maternally Expressed Transcript	RNA Gene	30	GC11M001995	9.3469	https://www.genecards.org/cgi-bin/carddisp.pl?gene=H19
CASP3	Caspase 3	Protein Coding	57	GC04M184627	9.30426	https://www.genecards.org/cgi-bin/carddisp.pl?gene=CASP3
UPK3A	Uroplakin 3A	Protein Coding	44	GC22P045284	9.28498	https://www.genecards.org/cgi-bin/carddisp.pl?gene=UPK3A
PDCD1	Programmed Cell Death 1	Protein Coding	55	GC02M241849	9.27843	https://www.genecards.org/cgi-bin/carddisp.pl?gene=PDCD1
STAT3	Signal Transducer And Activator Of Transcription 3	Protein Coding	61	GC17M042313	9.2414	https://www.genecards.org/cgi-bin/carddisp.pl?gene=STAT3
TNFRSF10A	TNF Receptor Superfamily Member 10a	Protein Coding	52	GC08M023190	9.20605	https://www.genecards.org/cgi-bin/carddisp.pl?gene=TNFRSF10A
PIK3CA	Phosphatidylinositol-4,5-Bisphosphate 3-Kinase Catalytic Subunit Alpha	Protein Coding	59	GC03P179148	9.20566	https://www.genecards.org/cgi-bin/carddisp.pl?gene=PIK3CA
IL6	Interleukin 6	Protein Coding	58	GC07P022725	9.1593	https://www.genecards.org/cgi-bin/carddisp.pl?gene=IL6
ERCC1	ERCC Excision Repair 1, Endonuclease Non-Catalytic Subunit	Protein Coding	52	GC19M070729	9.14533	https://www.genecards.org/cgi-bin/carddisp.pl?gene=ERCC1
EZH2	Enhancer Of Zeste 2 Polycomb Repressive Complex 2 Subunit	Protein Coding	60	GC07M148807	9.05839	https://www.genecards.org/cgi-bin/carddisp.pl?gene=EZH2
BAX	BCL2 Associated X, Apoptosis Regulator	Protein Coding	57	GC19P048954	9.05489	https://www.genecards.org/cgi-bin/carddisp.pl?gene=BAX
CYP1A1	Cytochrome P450 Family 1 Subfamily A Member 1	Protein Coding	55	GC15M074719	8.98285	https://www.genecards.org/cgi-bin/carddisp.pl?gene=CYP1A1
CCNE1	Cyclin E1	Protein Coding	55	GC19P029811	8.96169	https://www.genecards.org/cgi-bin/carddisp.pl?gene=CCNE1
HIF1A	Hypoxia Inducible Factor 1 Subunit Alpha	Protein Coding	54	GC14P061695	8.89132	https://www.genecards.org/cgi-bin/carddisp.pl?gene=HIF1A
SRC	SRC Proto-Oncogene, Non-Receptor Tyrosine Kinase	Protein Coding	58	GC20P037344	8.86828	https://www.genecards.org/cgi-bin/carddisp.pl?gene=SRC
BRAF	B-Raf Proto-Oncogene, Serine/Threonine Kinase	Protein Coding	60	GC07M140742	8.84907	https://www.genecards.org/cgi-bin/carddisp.pl?gene=BRAF
HBEGF	Heparin Binding EGF Like Growth Factor	Protein Coding	50	GC05M140332	8.77869	https://www.genecards.org/cgi-bin/carddisp.pl?gene=HBEGF
MKI67	Marker Of Proliferation Ki-67	Protein Coding	51	GC10M128096	8.75864	https://www.genecards.org/cgi-bin/carddisp.pl?gene=MKI67
CASP8	Caspase 8	Protein Coding	59	GC02P201233	8.65801	https://www.genecards.org/cgi-bin/carddisp.pl?gene=CASP8
MIR145	MicroRNA 145	RNA Gene	26	GC05P149430	8.59437	https://www.genecards.org/cgi-bin/carddisp.pl?gene=MIR145
PPARG	Peroxisome Proliferator Activated Receptor Gamma	Protein Coding	60	GC03P012287	8.58663	https://www.genecards.org/cgi-bin/carddisp.pl?gene=PPARG
MUC7	Mucin 7, Secreted	Protein Coding	41	GC04P070430	8.56869	https://www.genecards.org/cgi-bin/carddisp.pl?gene=MUC7
GHET1	Gastric Carcinoma Proliferation Enhancing Transcript 1	RNA Gene	15	GC07P150104	8.50585	https://www.genecards.org/cgi-bin/carddisp.pl?gene=GHET1
NUMA1	Nuclear Mitotic Apparatus Protein 1	Protein Coding	51	GC11M072002	8.48499	https://www.genecards.org/cgi-bin/carddisp.pl?gene=NUMA1
MUC2	Mucin 2, Oligomeric Mucus/Gel-Forming	Protein Coding	44	GC11P001074	8.43088	https://www.genecards.org/cgi-bin/carddisp.pl?gene=MUC2
ZNF224	Zinc Finger Protein 224	Protein Coding	43	GC19P044094	8.43088	https://www.genecards.org/cgi-bin/carddisp.pl?gene=ZNF224
ABCB1	ATP Binding Cassette Subfamily B Member 1	Protein Coding	57	GC07M087504	8.41035	https://www.genecards.org/cgi-bin/carddisp.pl?gene=ABCB1
KRT20	Keratin 20	Protein Coding	46	GC17M040875	8.39802	https://www.genecards.org/cgi-bin/carddisp.pl?gene=KRT20
CD44	CD44 Molecule (Indian Blood Group)	Protein Coding	55	GC11P035139	8.39289	https://www.genecards.org/cgi-bin/carddisp.pl?gene=CD44
ERCC4	ERCC Excision Repair 4, Endonuclease Catalytic Subunit	Protein Coding	52	GC16P013920	8.36646	https://www.genecards.org/cgi-bin/carddisp.pl?gene=ERCC4
PCNA	Proliferating Cell Nuclear Antigen	Protein Coding	57	GC20M005114	8.35588	https://www.genecards.org/cgi-bin/carddisp.pl?gene=PCNA
TNFSF10	TNF Superfamily Member 10	Protein Coding	51	GC03M172505	8.32519	https://www.genecards.org/cgi-bin/carddisp.pl?gene=TNFSF10
MET	MET Proto-Oncogene, Receptor Tyrosine Kinase	Protein Coding	61	GC07P116672	8.30809	https://www.genecards.org/cgi-bin/carddisp.pl?gene=MET
ZEB2-AS1	ZEB2 Antisense RNA 1	RNA Gene	23	GC02P144519	8.30519	https://www.genecards.org/cgi-bin/carddisp.pl?gene=ZEB2-AS1
MTOR	Mechanistic Target Of Rapamycin Kinase	Protein Coding	62	GC01M011106	8.25484	https://www.genecards.org/cgi-bin/carddisp.pl?gene=MTOR
PBOV1	Prostate And Breast Cancer Overexpressed 1	Protein Coding	31	GC06M138215	8.24092	https://www.genecards.org/cgi-bin/carddisp.pl?gene=PBOV1
MSH3	MutS Homolog 3	Protein Coding	50	GC05P080654	8.2265	https://www.genecards.org/cgi-bin/carddisp.pl?gene=MSH3
IL2	Interleukin 2	Protein Coding	53	GC04M122451	8.1945	https://www.genecards.org/cgi-bin/carddisp.pl?gene=IL2
GLIPR1	GLI Pathogenesis Related 1	Protein Coding	46	GC12P075480	8.18493	https://www.genecards.org/cgi-bin/carddisp.pl?gene=GLIPR1
CYP1B1	Cytochrome P450 Family 1 Subfamily B Member 1	Protein Coding	54	GC02M038066	8.16539	https://www.genecards.org/cgi-bin/carddisp.pl?gene=CYP1B1
FGF3	Fibroblast Growth Factor 3	Protein Coding	51	GC11M099887	8.13958	https://www.genecards.org/cgi-bin/carddisp.pl?gene=FGF3
CDKN1B	Cyclin Dependent Kinase Inhibitor 1B	Protein Coding	54	GC12P023759	8.13662	https://www.genecards.org/cgi-bin/carddisp.pl?gene=CDKN1B
CASP9	Caspase 9	Protein Coding	53	GC01M015491	8.11458	https://www.genecards.org/cgi-bin/carddisp.pl?gene=CASP9
PIK3R1	Phosphoinositide-3-Kinase Regulatory Subunit 1	Protein Coding	57	GC05P068215	8.11305	https://www.genecards.org/cgi-bin/carddisp.pl?gene=PIK3R1
RPS6KA5	Ribosomal Protein S6 Kinase A5	Protein Coding	52	GC14M090847	8.11305	https://www.genecards.org/cgi-bin/carddisp.pl?gene=RPS6KA5
MSH2	MutS Homolog 2	Protein Coding	56	GC02P047403	8.06312	https://www.genecards.org/cgi-bin/carddisp.pl?gene=MSH2
MLH1	MutL Homolog 1	Protein Coding	55	GC03P036993	8.06312	https://www.genecards.org/cgi-bin/carddisp.pl?gene=MLH1
VEGFC	Vascular Endothelial Growth Factor C	Protein Coding	53	GC04M176683	8.05963	https://www.genecards.org/cgi-bin/carddisp.pl?gene=VEGFC
BCL2L1	BCL2 Like 1	Protein Coding	55	GC20M031664	8.02306	https://www.genecards.org/cgi-bin/carddisp.pl?gene=BCL2L1
TYMS	Thymidylate Synthetase	Protein Coding	56	GC18P000657	8.01246	https://www.genecards.org/cgi-bin/carddisp.pl?gene=TYMS
ERBB4	Erb-B2 Receptor Tyrosine Kinase 4	Protein Coding	61	GC02M211375	7.98864	https://www.genecards.org/cgi-bin/carddisp.pl?gene=ERBB4
TLNRD1	Talin Rod Domain Containing 1	Protein Coding	35	GC15P123683	7.9475	https://www.genecards.org/cgi-bin/carddisp.pl?gene=TLNRD1
TWIST1	Twist Family BHLH Transcription Factor 1	Protein Coding	52	GC07M019020	7.86745	https://www.genecards.org/cgi-bin/carddisp.pl?gene=TWIST1
PMF1	Polyamine Modulated Factor 1	Protein Coding	43	GC01P156212	7.86662	https://www.genecards.org/cgi-bin/carddisp.pl?gene=PMF1
E2F3	E2F Transcription Factor 3	Protein Coding	48	GC06P020402	7.85841	https://www.genecards.org/cgi-bin/carddisp.pl?gene=E2F3
MALAT1	Metastasis Associated Lung Adenocarcinoma Transcript 1	RNA Gene	27	GC11P070867	7.79406	https://www.genecards.org/cgi-bin/carddisp.pl?gene=MALAT1
TUG1	Taurine Up-Regulated 1	Protein Coding	26	GC22P030969	7.78939	https://www.genecards.org/cgi-bin/carddisp.pl?gene=TUG1
IFNA2	Interferon Alpha 2	Protein Coding	50	GC09M021384	7.7673	https://www.genecards.org/cgi-bin/carddisp.pl?gene=IFNA2
CTAG2	Cancer/Testis Antigen 2	Protein Coding	39	GC0XM154651	7.75542	https://www.genecards.org/cgi-bin/carddisp.pl?gene=CTAG2
ZNF154	Zinc Finger Protein 154	Protein Coding	35	GC19M071272	7.74251	https://www.genecards.org/cgi-bin/carddisp.pl?gene=ZNF154
DNMT1	DNA Methyltransferase 1	Protein Coding	59	GC19M010133	7.72713	https://www.genecards.org/cgi-bin/carddisp.pl?gene=DNMT1
CDK6	Cyclin Dependent Kinase 6	Protein Coding	59	GC07M092604	7.72419	https://www.genecards.org/cgi-bin/carddisp.pl?gene=CDK6
TP73	Tumor Protein P73	Protein Coding	52	GC01P003652	7.72073	https://www.genecards.org/cgi-bin/carddisp.pl?gene=TP73
IFI27	Interferon Alpha Inducible Protein 27	Protein Coding	44	GC14P094104	7.70338	https://www.genecards.org/cgi-bin/carddisp.pl?gene=IFI27
CA9	Carbonic Anhydrase 9	Protein Coding	53	GC09P035673	7.68662	https://www.genecards.org/cgi-bin/carddisp.pl?gene=CA9
TGFBR1	Transforming Growth Factor Beta Receptor 1	Protein Coding	61	GC09P099104	7.68229	https://www.genecards.org/cgi-bin/carddisp.pl?gene=TGFBR1
DAPK2	Death Associated Protein Kinase 2	Protein Coding	47	GC15M063907	7.67064	https://www.genecards.org/cgi-bin/carddisp.pl?gene=DAPK2
FHIT	Fragile Histidine Triad Diadenosine Triphosphatase	Protein Coding	51	GC03M059747	7.64467	https://www.genecards.org/cgi-bin/carddisp.pl?gene=FHIT
ESR1	Estrogen Receptor 1	Protein Coding	61	GC06P151656	7.64223	https://www.genecards.org/cgi-bin/carddisp.pl?gene=ESR1
CAV1	Caveolin 1	Protein Coding	55	GC07P116524	7.64223	https://www.genecards.org/cgi-bin/carddisp.pl?gene=CAV1
MAP2K1	Mitogen-Activated Protein Kinase Kinase 1	Protein Coding	60	GC15P066386	7.6363	https://www.genecards.org/cgi-bin/carddisp.pl?gene=MAP2K1
RAB27A	RAB27A, Member RAS Oncogene Family	Protein Coding	55	GC15M055202	7.62747	https://www.genecards.org/cgi-bin/carddisp.pl?gene=RAB27A
TERC	Telomerase RNA Component	RNA Gene	31	GC03M169765	7.61091	https://www.genecards.org/cgi-bin/carddisp.pl?gene=TERC
ACTN4	Actinin Alpha 4	Protein Coding	53	GC19P038647	7.5991	https://www.genecards.org/cgi-bin/carddisp.pl?gene=ACTN4
ISG15	ISG15 Ubiquitin Like Modifier	Protein Coding	53	GC01P001001	7.58205	https://www.genecards.org/cgi-bin/carddisp.pl?gene=ISG15
IGF1R	Insulin Like Growth Factor 1 Receptor	Protein Coding	61	GC15P098648	7.57855	https://www.genecards.org/cgi-bin/carddisp.pl?gene=IGF1R
SYTL1	Synaptotagmin Like 1	Protein Coding	42	GC01P028429	7.57121	https://www.genecards.org/cgi-bin/carddisp.pl?gene=SYTL1
XIAP	X-Linked Inhibitor Of Apoptosis	Protein Coding	59	GC0XP123859	7.53983	https://www.genecards.org/cgi-bin/carddisp.pl?gene=XIAP
KRT19	Keratin 19	Protein Coding	50	GC17M041523	7.52493	https://www.genecards.org/cgi-bin/carddisp.pl?gene=KRT19
CDH2	Cadherin 2	Protein Coding	59	GC18M028088	7.50229	https://www.genecards.org/cgi-bin/carddisp.pl?gene=CDH2
PRKCA	Protein Kinase C Alpha	Protein Coding	57	GC17P066302	7.44418	https://www.genecards.org/cgi-bin/carddisp.pl?gene=PRKCA
HOTAIR	HOX Transcript Antisense RNA	RNA Gene	27	GC12M053962	7.44269	https://www.genecards.org/cgi-bin/carddisp.pl?gene=HOTAIR
GAS5	Growth Arrest Specific 5	RNA Gene	26	GC01M173947	7.43728	https://www.genecards.org/cgi-bin/carddisp.pl?gene=GAS5
EGR1	Early Growth Response 1	Protein Coding	52	GC05P138465	7.38747	https://www.genecards.org/cgi-bin/carddisp.pl?gene=EGR1
IL10	Interleukin 10	Protein Coding	55	GC01M206767	7.38591	https://www.genecards.org/cgi-bin/carddisp.pl?gene=IL10
KLF5	KLF Transcription Factor 5	Protein Coding	51	GC13P073054	7.36429	https://www.genecards.org/cgi-bin/carddisp.pl?gene=KLF5
TACC3	Transforming Acidic Coiled-Coil Containing Protein 3	Protein Coding	49	GC04P001723	7.36415	https://www.genecards.org/cgi-bin/carddisp.pl?gene=TACC3
PLK1	Polo Like Kinase 1	Protein Coding	58	GC16P024566	7.36327	https://www.genecards.org/cgi-bin/carddisp.pl?gene=PLK1
DNMT3B	DNA Methyltransferase 3 Beta	Protein Coding	57	GC20P032762	7.35219	https://www.genecards.org/cgi-bin/carddisp.pl?gene=DNMT3B
FGF2	Fibroblast Growth Factor 2	Protein Coding	52	GC04P122826	7.3399	https://www.genecards.org/cgi-bin/carddisp.pl?gene=FGF2
MIR133B	MicroRNA 133b	RNA Gene	23	GC06P052148	7.33473	https://www.genecards.org/cgi-bin/carddisp.pl?gene=MIR133B
SERPINB5	Serpin Family B Member 5	Protein Coding	49	GC18P063476	7.31467	https://www.genecards.org/cgi-bin/carddisp.pl?gene=SERPINB5
MIR100	MicroRNA 100	RNA Gene	24	GC11M122152	7.29812	https://www.genecards.org/cgi-bin/carddisp.pl?gene=MIR100
CDKN2B	Cyclin Dependent Kinase Inhibitor 2B	Protein Coding	53	GC09M022002	7.28853	https://www.genecards.org/cgi-bin/carddisp.pl?gene=CDKN2B
ERBB3	Erb-B2 Receptor Tyrosine Kinase 3	Protein Coding	60	GC12P057479	7.25485	https://www.genecards.org/cgi-bin/carddisp.pl?gene=ERBB3
TGFA	Transforming Growth Factor Alpha	Protein Coding	53	GC02M070447	7.23303	https://www.genecards.org/cgi-bin/carddisp.pl?gene=TGFA
CCND3	Cyclin D3	Protein Coding	53	GC06M041934	7.23297	https://www.genecards.org/cgi-bin/carddisp.pl?gene=CCND3
CLU	Clusterin	Protein Coding	54	GC08M027596	7.23073	https://www.genecards.org/cgi-bin/carddisp.pl?gene=CLU
PLAU	Plasminogen Activator, Urokinase	Protein Coding	59	GC10P073909	7.22796	https://www.genecards.org/cgi-bin/carddisp.pl?gene=PLAU
BRCA1	BRCA1 DNA Repair Associated	Protein Coding	56	GC17M043044	7.22002	https://www.genecards.org/cgi-bin/carddisp.pl?gene=BRCA1
CD82	CD82 Molecule	Protein Coding	50	GC11P044586	7.20523	https://www.genecards.org/cgi-bin/carddisp.pl?gene=CD82
BSG	Basigin (Ok Blood Group)	Protein Coding	51	GC19P000571	7.19228	https://www.genecards.org/cgi-bin/carddisp.pl?gene=BSG
TLR2	Toll Like Receptor 2	Protein Coding	59	GC04P153684	7.16996	https://www.genecards.org/cgi-bin/carddisp.pl?gene=TLR2
MIR203A	MicroRNA 203a	RNA Gene	23	GC14P110640	7.16092	https://www.genecards.org/cgi-bin/carddisp.pl?gene=MIR203A
STAG2	Stromal Antigen 2	Protein Coding	52	GC0XP123960	7.15598	https://www.genecards.org/cgi-bin/carddisp.pl?gene=STAG2
MIR99A	MicroRNA 99a	RNA Gene	24	GC21P016539	7.13979	https://www.genecards.org/cgi-bin/carddisp.pl?gene=MIR99A
TOP2A	DNA Topoisomerase II Alpha	Protein Coding	57	GC17M040388	7.13926	https://www.genecards.org/cgi-bin/carddisp.pl?gene=TOP2A
TIMP2	TIMP Metallopeptidase Inhibitor 2	Protein Coding	48	GC17M078852	7.13791	https://www.genecards.org/cgi-bin/carddisp.pl?gene=TIMP2
PVT1	Pvt1 Oncogene	RNA Gene	28	GC08P127884	7.13727	https://www.genecards.org/cgi-bin/carddisp.pl?gene=PVT1
MIR205	MicroRNA 205	RNA Gene	22	GC01P209432	7.09943	https://www.genecards.org/cgi-bin/carddisp.pl?gene=MIR205
CXADR	CXADR Ig-Like Cell Adhesion Molecule	Protein Coding	50	GC21P017513	7.0747	https://www.genecards.org/cgi-bin/carddisp.pl?gene=CXADR
LINC00958	Long Intergenic Non-Protein Coding RNA 958	RNA Gene	19	GC11M012877	7.0747	https://www.genecards.org/cgi-bin/carddisp.pl?gene=LINC00958
FGFR1	Fibroblast Growth Factor Receptor 1	Protein Coding	63	GC08M038400	7.04644	https://www.genecards.org/cgi-bin/carddisp.pl?gene=FGFR1
ABCC1	ATP Binding Cassette Subfamily C Member 1	Protein Coding	56	GC16P015949	7.03433	https://www.genecards.org/cgi-bin/carddisp.pl?gene=ABCC1
MEG3	Maternally Expressed 3	RNA Gene	31	GC14P110892	7.03433	https://www.genecards.org/cgi-bin/carddisp.pl?gene=MEG3
CDK1	Cyclin Dependent Kinase 1	Protein Coding	54	GC10P060772	7.00601	https://www.genecards.org/cgi-bin/carddisp.pl?gene=CDK1
HYAL1	Hyaluronidase 1	Protein Coding	53	GC03M050299	6.99136	https://www.genecards.org/cgi-bin/carddisp.pl?gene=HYAL1
SFRP1	Secreted Frizzled Related Protein 1	Protein Coding	51	GC08M041262	6.99136	https://www.genecards.org/cgi-bin/carddisp.pl?gene=SFRP1
PLAUR	Plasminogen Activator, Urokinase Receptor	Protein Coding	52	GC19M043646	6.94786	https://www.genecards.org/cgi-bin/carddisp.pl?gene=PLAUR
JUP	Junction Plakoglobin	Protein Coding	55	GC17M041754	6.93364	https://www.genecards.org/cgi-bin/carddisp.pl?gene=JUP
HIF1A-AS2	HIF1A Antisense RNA 2	RNA Gene	18	GC14M061747	6.91459	https://www.genecards.org/cgi-bin/carddisp.pl?gene=HIF1A-AS2
MIR29C	MicroRNA 29c	RNA Gene	21	GC01M207811	6.91359	https://www.genecards.org/cgi-bin/carddisp.pl?gene=MIR29C
CCNA2	Cyclin A2	Protein Coding	52	GC04M121816	6.8946	https://www.genecards.org/cgi-bin/carddisp.pl?gene=CCNA2
JUN	Jun Proto-Oncogene, AP-1 Transcription Factor Subunit	Protein Coding	55	GC01M058780	6.89246	https://www.genecards.org/cgi-bin/carddisp.pl?gene=JUN
PGM5-AS1	PGM5 Antisense RNA 1	RNA Gene	18	GC09M068861	6.89163	https://www.genecards.org/cgi-bin/carddisp.pl?gene=PGM5-AS1
ZFAS1	ZNFX1 Antisense RNA 1	RNA Gene	23	GC20P049276	6.86798	https://www.genecards.org/cgi-bin/carddisp.pl?gene=ZFAS1
S100A4	S100 Calcium Binding Protein A4	Protein Coding	52	GC01M153543	6.85866	https://www.genecards.org/cgi-bin/carddisp.pl?gene=S100A4
TIMP3	TIMP Metallopeptidase Inhibitor 3	Protein Coding	50	GC22P044970	6.85588	https://www.genecards.org/cgi-bin/carddisp.pl?gene=TIMP3
NME1	NME/NM23 Nucleoside Diphosphate Kinase 1	Protein Coding	51	GC17P062974	6.8485	https://www.genecards.org/cgi-bin/carddisp.pl?gene=NME1
MIR200A	MicroRNA 200a	RNA Gene	23	GC01P004363	6.8415	https://www.genecards.org/cgi-bin/carddisp.pl?gene=MIR200A
TINCR	TINCR Ubiquitin Domain Containing	Protein Coding	29	GC19M005558	6.83108	https://www.genecards.org/cgi-bin/carddisp.pl?gene=TINCR
TNFRSF10B	TNF Receptor Superfamily Member 10b	Protein Coding	57	GC08M023020	6.81836	https://www.genecards.org/cgi-bin/carddisp.pl?gene=TNFRSF10B
SNAI2	Snail Family Transcriptional Repressor 2	Protein Coding	51	GC08M048917	6.81733	https://www.genecards.org/cgi-bin/carddisp.pl?gene=SNAI2
ANG	Angiogenin	Protein Coding	51	GC14P034388	6.78437	https://www.genecards.org/cgi-bin/carddisp.pl?gene=ANG
LINC00355	Long Intergenic Non-Protein Coding RNA 355	RNA Gene	18	GC13M063838	6.78437	https://www.genecards.org/cgi-bin/carddisp.pl?gene=LINC00355
FGFR2	Fibroblast Growth Factor Receptor 2	Protein Coding	63	GC10M121478	6.76712	https://www.genecards.org/cgi-bin/carddisp.pl?gene=FGFR2
APAF1	Apoptotic Peptidase Activating Factor 1	Protein Coding	52	GC12P098645	6.74983	https://www.genecards.org/cgi-bin/carddisp.pl?gene=APAF1
HSP90AA1	Heat Shock Protein 90 Alpha Family Class A Member 1	Protein Coding	57	GC14M102080	6.74928	https://www.genecards.org/cgi-bin/carddisp.pl?gene=HSP90AA1
PCAT1	Prostate Cancer Associated Transcript 1	RNA Gene	20	GC08P126553	6.73672	https://www.genecards.org/cgi-bin/carddisp.pl?gene=PCAT1
FOXD2-AS1	FOXD2 Adjacent Opposite Strand RNA 1	RNA Gene	19	GC01M047432	6.73672	https://www.genecards.org/cgi-bin/carddisp.pl?gene=FOXD2-AS1
MIR31	MicroRNA 31	RNA Gene	22	GC09M021837	6.73568	https://www.genecards.org/cgi-bin/carddisp.pl?gene=MIR31
GSN	Gelsolin	Protein Coding	56	GC09P121201	6.70707	https://www.genecards.org/cgi-bin/carddisp.pl?gene=GSN
CDK2	Cyclin Dependent Kinase 2	Protein Coding	58	GC12P055966	6.69155	https://www.genecards.org/cgi-bin/carddisp.pl?gene=CDK2
MIR222	MicroRNA 222	RNA Gene	23	GC0XM045747	6.69078	https://www.genecards.org/cgi-bin/carddisp.pl?gene=MIR222
MIR223	MicroRNA 223	RNA Gene	25	GC0XP066018	6.69034	https://www.genecards.org/cgi-bin/carddisp.pl?gene=MIR223
SNHG16	Small Nucleolar RNA Host Gene 16	RNA Gene	22	GC17P076544	6.68305	https://www.genecards.org/cgi-bin/carddisp.pl?gene=SNHG16
MMP14	Matrix Metallopeptidase 14	Protein Coding	57	GC14P034667	6.6759	https://www.genecards.org/cgi-bin/carddisp.pl?gene=MMP14
CCL5	C-C Motif Chemokine Ligand 5	Protein Coding	51	GC17M035871	6.64445	https://www.genecards.org/cgi-bin/carddisp.pl?gene=CCL5
CSF3R	Colony Stimulating Factor 3 Receptor	Protein Coding	54	GC01M036466	6.64294	https://www.genecards.org/cgi-bin/carddisp.pl?gene=CSF3R
RALA	RAS Like Proto-Oncogene A	Protein Coding	52	GC07P039622	6.64294	https://www.genecards.org/cgi-bin/carddisp.pl?gene=RALA
AREG	Amphiregulin	Protein Coding	50	GC04P074445	6.64294	https://www.genecards.org/cgi-bin/carddisp.pl?gene=AREG
KDR	Kinase Insert Domain Receptor	Protein Coding	60	GC04M055078	6.62569	https://www.genecards.org/cgi-bin/carddisp.pl?gene=KDR
CYP4B1	Cytochrome P450 Family 4 Subfamily B Member 1	Protein Coding	50	GC01P046757	6.62569	https://www.genecards.org/cgi-bin/carddisp.pl?gene=CYP4B1
ZEB1-AS1	ZEB1 Antisense RNA 1	RNA Gene	21	GC10M031166	6.62569	https://www.genecards.org/cgi-bin/carddisp.pl?gene=ZEB1-AS1
XIST	X Inactive Specific Transcript	RNA Gene	26	GC0XM073820	6.60451	https://www.genecards.org/cgi-bin/carddisp.pl?gene=XIST
MDC1-AS1	MDC1 Antisense RNA 1	RNA Gene	17	GC06P092133	6.60451	https://www.genecards.org/cgi-bin/carddisp.pl?gene=MDC1-AS1
MRE11	MRE11 Homolog, Double Strand Break Repair Nuclease	Protein Coding	55	GC11M100293	6.60379	https://www.genecards.org/cgi-bin/carddisp.pl?gene=MRE11
PTCH1	Patched 1	Protein Coding	57	GC09M095442	6.57619	https://www.genecards.org/cgi-bin/carddisp.pl?gene=PTCH1
CDKN2B-AS1	CDKN2B Antisense RNA 1	RNA Gene	26	GC09P021994	6.57016	https://www.genecards.org/cgi-bin/carddisp.pl?gene=CDKN2B-AS1
DEK	DEK Proto-Oncogene	Protein Coding	47	GC06M018224	6.56154	https://www.genecards.org/cgi-bin/carddisp.pl?gene=DEK
MIR23B	MicroRNA 23b	RNA Gene	22	GC09P095085	6.5475	https://www.genecards.org/cgi-bin/carddisp.pl?gene=MIR23B
MIR195	MicroRNA 195	RNA Gene	22	GC17M007043	6.5241	https://www.genecards.org/cgi-bin/carddisp.pl?gene=MIR195
BICDL3P	BICD Family Like 3, Pseudogene	RNA Gene	13	GC07P076503	6.51537	https://www.genecards.org/cgi-bin/carddisp.pl?gene=BICDL3P
ITGB1	Integrin Subunit Beta 1	Protein Coding	57	GC10M033645	6.50712	https://www.genecards.org/cgi-bin/carddisp.pl?gene=ITGB1
KRT18	Keratin 18	Protein Coding	56	GC12P052948	6.49913	https://www.genecards.org/cgi-bin/carddisp.pl?gene=KRT18
DUXAP9	Double Homeobox A Pseudogene 9	Pseudogene	11	GC14P034255	6.48382	https://www.genecards.org/cgi-bin/carddisp.pl?gene=DUXAP9
EPAS1	Endothelial PAS Domain Protein 1	Protein Coding	57	GC02P046293	6.46516	https://www.genecards.org/cgi-bin/carddisp.pl?gene=EPAS1
CASC8	Cancer Susceptibility 8	RNA Gene	18	GC08M132537	6.46516	https://www.genecards.org/cgi-bin/carddisp.pl?gene=CASC8
MIR129-1	MicroRNA 129-1	RNA Gene	19	GC07P128207	6.45469	https://www.genecards.org/cgi-bin/carddisp.pl?gene=MIR129-1
PPARA	Peroxisome Proliferator Activated Receptor Alpha	Protein Coding	51	GC22P046150	6.44732	https://www.genecards.org/cgi-bin/carddisp.pl?gene=PPARA
MT1E	Metallothionein 1E	Protein Coding	43	GC16P056625	6.44732	https://www.genecards.org/cgi-bin/carddisp.pl?gene=MT1E
SYNPO2	Synaptopodin 2	Protein Coding	43	GC04P118850	6.44732	https://www.genecards.org/cgi-bin/carddisp.pl?gene=SYNPO2
XPC	XPC Complex Subunit, DNA Damage Recognition And Repair Factor	Protein Coding	52	GC03M021831	6.44276	https://www.genecards.org/cgi-bin/carddisp.pl?gene=XPC
LZTS1	Leucine Zipper Tumor Suppressor 1	Protein Coding	45	GC08M020246	6.42884	https://www.genecards.org/cgi-bin/carddisp.pl?gene=LZTS1
MIR31HG	MIR31 Host Gene	RNA Gene	22	GC09M021834	6.42884	https://www.genecards.org/cgi-bin/carddisp.pl?gene=MIR31HG
KRT8	Keratin 8	Protein Coding	53	GC12M052897	6.40963	https://www.genecards.org/cgi-bin/carddisp.pl?gene=KRT8
CTNNA1	Catenin Alpha 1	Protein Coding	52	GC05P138613	6.40963	https://www.genecards.org/cgi-bin/carddisp.pl?gene=CTNNA1
EREG	Epiregulin	Protein Coding	50	GC04P074366	6.40963	https://www.genecards.org/cgi-bin/carddisp.pl?gene=EREG
FGF1	Fibroblast Growth Factor 1	Protein Coding	54	GC05M142555	6.3896	https://www.genecards.org/cgi-bin/carddisp.pl?gene=FGF1
SPRY4-IT1	SPRY4 Intronic Transcript 1	RNA Gene	17	GC05M142318	6.3896	https://www.genecards.org/cgi-bin/carddisp.pl?gene=SPRY4-IT1
FABP4	Fatty Acid Binding Protein 4	Protein Coding	50	GC08M081478	6.37112	https://www.genecards.org/cgi-bin/carddisp.pl?gene=FABP4
MIR26B	MicroRNA 26b	RNA Gene	25	GC02P218402	6.36863	https://www.genecards.org/cgi-bin/carddisp.pl?gene=MIR26B
CDH3	Cadherin 3	Protein Coding	54	GC16P068637	6.35612	https://www.genecards.org/cgi-bin/carddisp.pl?gene=CDH3
PANDAR	Promoter Of CDKN1A Antisense DNA Damage Activated RNA	RNA Gene	14	GC06M036673	6.35612	https://www.genecards.org/cgi-bin/carddisp.pl?gene=PANDAR
RHOA	Ras Homolog Family Member A	Protein Coding	57	GC03M049359	6.34659	https://www.genecards.org/cgi-bin/carddisp.pl?gene=RHOA
HSPB1	Heat Shock Protein Family B (Small) Member 1	Protein Coding	59	GC07P076302	6.32329	https://www.genecards.org/cgi-bin/carddisp.pl?gene=HSPB1
FN1	Fibronectin 1	Protein Coding	57	GC02M215360	6.32329	https://www.genecards.org/cgi-bin/carddisp.pl?gene=FN1
PRECSIT	P53 Regulated Carcinoma Associated Stat3 Activating Long Intergenic Non-Protein Coding Transcript	RNA Gene	25	GC13M110864	6.292	https://www.genecards.org/cgi-bin/carddisp.pl?gene=PRECSIT
HNF1A-AS1	HNF1A Antisense RNA 1	RNA Gene	22	GC12M122448	6.292	https://www.genecards.org/cgi-bin/carddisp.pl?gene=HNF1A-AS1
MIR23A	MicroRNA 23a	RNA Gene	23	GC19M014657	6.26427	https://www.genecards.org/cgi-bin/carddisp.pl?gene=MIR23A
ANXA5	Annexin A5	Protein Coding	52	GC04M121667	6.25691	https://www.genecards.org/cgi-bin/carddisp.pl?gene=ANXA5
CCAT2	Colon Cancer Associated Transcript 2	RNA Gene	15	GC08P127400	6.25691	https://www.genecards.org/cgi-bin/carddisp.pl?gene=CCAT2
MIR17	MicroRNA 17	RNA Gene	22	GC13P091350	6.2433	https://www.genecards.org/cgi-bin/carddisp.pl?gene=MIR17
CTAG1B	Cancer/Testis Antigen 1B	Protein Coding	35	GC0XM154617	6.24283	https://www.genecards.org/cgi-bin/carddisp.pl?gene=CTAG1B
KLK3	Kallikrein Related Peptidase 3	Protein Coding	53	GC19P050854	6.23842	https://www.genecards.org/cgi-bin/carddisp.pl?gene=KLK3
KRT7	Keratin 7	Protein Coding	48	GC12P052232	6.21921	https://www.genecards.org/cgi-bin/carddisp.pl?gene=KRT7
HAGLR	HOXD Antisense Growth-Associated Long Non-Coding RNA	RNA Gene	21	GC02M176169	6.21921	https://www.genecards.org/cgi-bin/carddisp.pl?gene=HAGLR
SCHLAP1	SWI/SNF Complex Antagonist Associated With Prostate Cancer 1	RNA Gene	15	GC02P180511	6.21921	https://www.genecards.org/cgi-bin/carddisp.pl?gene=SCHLAP1
SUMO1P3	SUMO1 Pseudogene 3	Pseudogene	13	GC01P160317	6.21921	https://www.genecards.org/cgi-bin/carddisp.pl?gene=SUMO1P3
CALR	Calreticulin	Protein Coding	58	GC19P012938	6.17821	https://www.genecards.org/cgi-bin/carddisp.pl?gene=CALR
GAPDH	Glyceraldehyde-3-Phosphate Dehydrogenase	Protein Coding	57	GC12P023539	6.17821	https://www.genecards.org/cgi-bin/carddisp.pl?gene=GAPDH
HULC	Hepatocellular Carcinoma Up-Regulated Long Non-Coding RNA	RNA Gene	24	GC06P008441	6.17821	https://www.genecards.org/cgi-bin/carddisp.pl?gene=HULC
UPK1A	Uroplakin 1A	Protein Coding	43	GC19P072737	6.09965	https://www.genecards.org/cgi-bin/carddisp.pl?gene=UPK1A
CFLAR	CASP8 And FADD Like Apoptosis Regulator	Protein Coding	51	GC02P201122	6.05241	https://www.genecards.org/cgi-bin/carddisp.pl?gene=CFLAR
CXCL10	C-X-C Motif Chemokine Ligand 10	Protein Coding	51	GC04M076021	6.05241	https://www.genecards.org/cgi-bin/carddisp.pl?gene=CXCL10
CGB3	Chorionic Gonadotropin Subunit Beta 3	Protein Coding	40	GC19M070870	6.02035	https://www.genecards.org/cgi-bin/carddisp.pl?gene=CGB3
BANCR	BRAF-Activated Non-Protein Coding RNA	RNA Gene	17	GC09M069296	6.02035	https://www.genecards.org/cgi-bin/carddisp.pl?gene=BANCR
NORAD	Non-Coding RNA Activated By DNA Damage	RNA Gene	20	GC20M036294	5.98396	https://www.genecards.org/cgi-bin/carddisp.pl?gene=NORAD
LINC00312	Long Intergenic Non-Protein Coding RNA 312	RNA Gene	22	GC03P008571	5.94079	https://www.genecards.org/cgi-bin/carddisp.pl?gene=LINC00312
CCEPR	Cervical Carcinoma Expressed PCNA Regulatory LncRNA	RNA Gene	13	GC10M059174	5.93006	https://www.genecards.org/cgi-bin/carddisp.pl?gene=CCEPR
TNXA	Tenascin XA (Pseudogene)	Pseudogene	27	GC06M071744	5.90802	https://www.genecards.org/cgi-bin/carddisp.pl?gene=TNXA
IGFBP7	Insulin Like Growth Factor Binding Protein 7	Protein Coding	52	GC04M057030	5.88471	https://www.genecards.org/cgi-bin/carddisp.pl?gene=IGFBP7
SPAM1	Sperm Adhesion Molecule 1	Protein Coding	47	GC07P123925	5.88471	https://www.genecards.org/cgi-bin/carddisp.pl?gene=SPAM1
CADM3-AS1	CADM3 Antisense RNA 1	RNA Gene	18	GC01M159193	5.88471	https://www.genecards.org/cgi-bin/carddisp.pl?gene=CADM3-AS1
EPIST	Esophagus Epithelial Intergenic Associated Transcript	RNA Gene	18	GC05M135145	5.88471	https://www.genecards.org/cgi-bin/carddisp.pl?gene=EPIST
KRT19P3	Keratin 19 Pseudogene 3	Pseudogene	10	GC04M109879	5.88471	https://www.genecards.org/cgi-bin/carddisp.pl?gene=KRT19P3
SNHG5	Small Nucleolar RNA Host Gene 5	RNA Gene	24	GC06M085650	5.88453	https://www.genecards.org/cgi-bin/carddisp.pl?gene=SNHG5
CHKA	Choline Kinase Alpha	Protein Coding	49	GC11M068052	5.80426	https://www.genecards.org/cgi-bin/carddisp.pl?gene=CHKA
VIM2P	Vimentin 2, Pseudogene	Pseudogene	7	GC06M126602	5.80426	https://www.genecards.org/cgi-bin/carddisp.pl?gene=VIM2P
CTNNA3	Catenin Alpha 3	Protein Coding	47	GC10M065912	5.80076	https://www.genecards.org/cgi-bin/carddisp.pl?gene=CTNNA3
PLG	Plasminogen	Protein Coding	56	GC06P160702	5.77219	https://www.genecards.org/cgi-bin/carddisp.pl?gene=PLG
CTCF	CCCTC-Binding Factor	Protein Coding	53	GC16P067563	5.7358	https://www.genecards.org/cgi-bin/carddisp.pl?gene=CTCF
MIR10A	MicroRNA 10a	RNA Gene	24	GC17M048579	5.7358	https://www.genecards.org/cgi-bin/carddisp.pl?gene=MIR10A
MIR199A1	MicroRNA 199a-1	RNA Gene	22	GC19M010817	5.70146	https://www.genecards.org/cgi-bin/carddisp.pl?gene=MIR199A1
MTHFR	Methylenetetrahydrofolate Reductase	Protein Coding	54	GC01M011785	5.65113	https://www.genecards.org/cgi-bin/carddisp.pl?gene=MTHFR
MIR30E	MicroRNA 30e	RNA Gene	25	GC01P040754	5.63637	https://www.genecards.org/cgi-bin/carddisp.pl?gene=MIR30E
RNY1	RNA, Ro60-Associated Y1	RNA Gene	19	GC07M148987	5.63637	https://www.genecards.org/cgi-bin/carddisp.pl?gene=RNY1
RNY3	RNA, Ro60-Associated Y3	RNA Gene	18	GC07P150103	5.63637	https://www.genecards.org/cgi-bin/carddisp.pl?gene=RNY3
LINC02820	Long Intergenic Non-Protein Coding RNA 2820	RNA Gene	14	GC12P085320	5.63637	https://www.genecards.org/cgi-bin/carddisp.pl?gene=LINC02820
LINC02866	Long Intergenic Non-Protein Coding RNA 2866	RNA Gene	14	GC08P040139	5.37195	https://www.genecards.org/cgi-bin/carddisp.pl?gene=LINC02866
MIR103A1	MicroRNA 103a-1	RNA Gene	20	GC05M168560	5.29923	https://www.genecards.org/cgi-bin/carddisp.pl?gene=MIR103A1
MIR185	MicroRNA 185	RNA Gene	25	GC22P044371	5.20179	https://www.genecards.org/cgi-bin/carddisp.pl?gene=MIR185
CCDC144NL-AS1	CCDC144NL Antisense RNA 1	RNA Gene	17	GC17P063162	5.17309	https://www.genecards.org/cgi-bin/carddisp.pl?gene=CCDC144NL-AS1
DRAIC	Downregulated RNA In Cancer, Inhibitor Of Cell Invasion And Migration	RNA Gene	17	GC15P123403	5.1367	https://www.genecards.org/cgi-bin/carddisp.pl?gene=DRAIC
PCAT29	Prostate Cancer Associated Transcript 29	RNA Gene	18	GC15P124922	5.09353	https://www.genecards.org/cgi-bin/carddisp.pl?gene=PCAT29
H2AC18	H2A Clustered Histone 18	Protein Coding	35	GC01M152688	4.96654	https://www.genecards.org/cgi-bin/carddisp.pl?gene=H2AC18
MIR452	MicroRNA 452	RNA Gene	18	GC0XM151959	4.90145	https://www.genecards.org/cgi-bin/carddisp.pl?gene=MIR452
CHEK2	Checkpoint Kinase 2	Protein Coding	61	GC22M028687	4.76029	https://www.genecards.org/cgi-bin/carddisp.pl?gene=CHEK2
BRCA2	BRCA2 DNA Repair Associated	Protein Coding	53	GC13P032315	4.65971	https://www.genecards.org/cgi-bin/carddisp.pl?gene=BRCA2
SULT1A1	Sulfotransferase Family 1A Member 1	Protein Coding	50	GC16M038249	4.64557	https://www.genecards.org/cgi-bin/carddisp.pl?gene=SULT1A1
CYP1A2	Cytochrome P450 Family 1 Subfamily A Member 2	Protein Coding	52	GC15P074748	4.55886	https://www.genecards.org/cgi-bin/carddisp.pl?gene=CYP1A2
CCDC112	Coiled-Coil Domain Containing 112	Protein Coding	39	GC05M115267	4.54661	https://www.genecards.org/cgi-bin/carddisp.pl?gene=CCDC112
LNC-LBCS	LncRNA Bladder And Prostate Cancer Suppressor, HnRNPK Interacting	RNA Gene	18	GC06M019225	4.49171	https://www.genecards.org/cgi-bin/carddisp.pl?gene=LNC-LBCS
SOD2	Superoxide Dismutase 2	Protein Coding	53	GC06M159669	4.40415	https://www.genecards.org/cgi-bin/carddisp.pl?gene=SOD2
CD274	CD274 Molecule	Protein Coding	52	GC09P005450	4.27724	https://www.genecards.org/cgi-bin/carddisp.pl?gene=CD274
MTR	5-Methyltetrahydrofolate-Homocysteine Methyltransferase	Protein Coding	54	GC01P236795	4.22297	https://www.genecards.org/cgi-bin/carddisp.pl?gene=MTR
ERCC5	ERCC Excision Repair 5, Endonuclease	Protein Coding	51	GC13P102845	4.15537	https://www.genecards.org/cgi-bin/carddisp.pl?gene=ERCC5
AR	Androgen Receptor	Protein Coding	59	GC0XP067544	4.10132	https://www.genecards.org/cgi-bin/carddisp.pl?gene=AR
CYP2E1	Cytochrome P450 Family 2 Subfamily E Member 1	Protein Coding	52	GC10P133520	4.05241	https://www.genecards.org/cgi-bin/carddisp.pl?gene=CYP2E1
NFKB1	Nuclear Factor Kappa B Subunit 1	Protein Coding	60	GC04P102501	4.03181	https://www.genecards.org/cgi-bin/carddisp.pl?gene=NFKB1
NBN	Nibrin	Protein Coding	55	GC08M089933	4.02142	https://www.genecards.org/cgi-bin/carddisp.pl?gene=NBN
ERCC6	ERCC Excision Repair 6, Chromatin Remodeling Factor	Protein Coding	52	GC10M049454	4.00759	https://www.genecards.org/cgi-bin/carddisp.pl?gene=ERCC6
GPX1	Glutathione Peroxidase 1	Protein Coding	52	GC03M051566	3.96123	https://www.genecards.org/cgi-bin/carddisp.pl?gene=GPX1
FAS	Fas Cell Surface Death Receptor	Protein Coding	57	GC10P094616	3.87677	https://www.genecards.org/cgi-bin/carddisp.pl?gene=FAS
CYP2D6	Cytochrome P450 Family 2 Subfamily D Member 6	Protein Coding	53	GC22M042126	3.76798	https://www.genecards.org/cgi-bin/carddisp.pl?gene=CYP2D6
NTHL1	Nth Like DNA Glycosylase 1	Protein Coding	51	GC16M008091	3.67686	https://www.genecards.org/cgi-bin/carddisp.pl?gene=NTHL1
TGFB1	Transforming Growth Factor Beta 1	Protein Coding	60	GC19M041301	3.58566	https://www.genecards.org/cgi-bin/carddisp.pl?gene=TGFB1
BMI1	BMI1 Proto-Oncogene, Polycomb Ring Finger	Protein Coding	50	GC10P022326	3.43422	https://www.genecards.org/cgi-bin/carddisp.pl?gene=BMI1
TLR4	Toll Like Receptor 4	Protein Coding	58	GC09P117704	3.33085	https://www.genecards.org/cgi-bin/carddisp.pl?gene=TLR4
MGMT	O-6-Methylguanine-DNA Methyltransferase	Protein Coding	56	GC10P129467	3.3035	https://www.genecards.org/cgi-bin/carddisp.pl?gene=MGMT
APC	APC Regulator Of WNT Signaling Pathway	Protein Coding	56	GC05P112707	3.27617	https://www.genecards.org/cgi-bin/carddisp.pl?gene=APC
ESR2	Estrogen Receptor 2	Protein Coding	56	GC14M064084	3.27538	https://www.genecards.org/cgi-bin/carddisp.pl?gene=ESR2
IL4	Interleukin 4	Protein Coding	53	GC05P132673	3.23116	https://www.genecards.org/cgi-bin/carddisp.pl?gene=IL4
FASLG	Fas Ligand	Protein Coding	55	GC01P172628	3.19606	https://www.genecards.org/cgi-bin/carddisp.pl?gene=FASLG
GSTM3	Glutathione S-Transferase Mu 3	Protein Coding	53	GC01M109733	3.19313	https://www.genecards.org/cgi-bin/carddisp.pl?gene=GSTM3
XRCC4	X-Ray Repair Cross Complementing 4	Protein Coding	50	GC05P083077	3.19064	https://www.genecards.org/cgi-bin/carddisp.pl?gene=XRCC4
IL1B	Interleukin 1 Beta	Protein Coding	54	GC02M112829	3.18108	https://www.genecards.org/cgi-bin/carddisp.pl?gene=IL1B
IL1A	Interleukin 1 Alpha	Protein Coding	52	GC02M112773	3.18108	https://www.genecards.org/cgi-bin/carddisp.pl?gene=IL1A
MIR34A	MicroRNA 34a	RNA Gene	25	GC01M009154	3.18087	https://www.genecards.org/cgi-bin/carddisp.pl?gene=MIR34A
CSF3	Colony Stimulating Factor 3	Protein Coding	47	GC17P040015	3.14187	https://www.genecards.org/cgi-bin/carddisp.pl?gene=CSF3
PARP1	Poly(ADP-Ribose) Polymerase 1	Protein Coding	58	GC01M226360	3.1396	https://www.genecards.org/cgi-bin/carddisp.pl?gene=PARP1
SHH	Sonic Hedgehog Signaling Molecule	Protein Coding	57	GC07M155799	3.13116	https://www.genecards.org/cgi-bin/carddisp.pl?gene=SHH
IFNG	Interferon Gamma	Protein Coding	57	GC12M068154	3.11132	https://www.genecards.org/cgi-bin/carddisp.pl?gene=IFNG
EPHX1	Epoxide Hydrolase 1	Protein Coding	52	GC01P225810	3.07332	https://www.genecards.org/cgi-bin/carddisp.pl?gene=EPHX1
MMP3	Matrix Metallopeptidase 3	Protein Coding	57	GC11M102835	3.06506	https://www.genecards.org/cgi-bin/carddisp.pl?gene=MMP3
CCL2	C-C Motif Chemokine Ligand 2	Protein Coding	56	GC17P034255	3.05563	https://www.genecards.org/cgi-bin/carddisp.pl?gene=CCL2
MIR182	MicroRNA 182	RNA Gene	24	GC07M129770	2.99176	https://www.genecards.org/cgi-bin/carddisp.pl?gene=MIR182
NOS2	Nitric Oxide Synthase 2	Protein Coding	56	GC17M027756	2.99134	https://www.genecards.org/cgi-bin/carddisp.pl?gene=NOS2
MT-ATP8	Mitochondrially Encoded ATP Synthase Membrane Subunit 8	Protein Coding	36	GCMTP008368	2.98998	https://www.genecards.org/cgi-bin/carddisp.pl?gene=MT-ATP8
MUTYH	MutY DNA Glycosylase	Protein Coding	52	GC01M045329	2.96553	https://www.genecards.org/cgi-bin/carddisp.pl?gene=MUTYH
MIR146A	MicroRNA 146a	RNA Gene	25	GC05P160485	2.94666	https://www.genecards.org/cgi-bin/carddisp.pl?gene=MIR146A
COMT	Catechol-O-Methyltransferase	Protein Coding	59	GC22P019941	2.9305	https://www.genecards.org/cgi-bin/carddisp.pl?gene=COMT
MTRR	5-Methyltetrahydrofolate-Homocysteine Methyltransferase Reductase	Protein Coding	50	GC05P007851	2.90304	https://www.genecards.org/cgi-bin/carddisp.pl?gene=MTRR
SYTL2	Synaptotagmin Like 2	Protein Coding	45	GC11M085694	2.86664	https://www.genecards.org/cgi-bin/carddisp.pl?gene=SYTL2
GATA3	GATA Binding Protein 3	Protein Coding	56	GC10P008045	2.86382	https://www.genecards.org/cgi-bin/carddisp.pl?gene=GATA3
MPO	Myeloperoxidase	Protein Coding	59	GC17M058269	2.83328	https://www.genecards.org/cgi-bin/carddisp.pl?gene=MPO
IGFBP3	Insulin Like Growth Factor Binding Protein 3	Protein Coding	54	GC07M045912	2.82286	https://www.genecards.org/cgi-bin/carddisp.pl?gene=IGFBP3
BIRC7	Baculoviral IAP Repeat Containing 7	Protein Coding	47	GC20P063235	2.81928	https://www.genecards.org/cgi-bin/carddisp.pl?gene=BIRC7
ICAM1	Intercellular Adhesion Molecule 1	Protein Coding	57	GC19P010749	2.81143	https://www.genecards.org/cgi-bin/carddisp.pl?gene=ICAM1
POU5F1	POU Class 5 Homeobox 1	Protein Coding	51	GC06M071676	2.80459	https://www.genecards.org/cgi-bin/carddisp.pl?gene=POU5F1
MIR193A	MicroRNA 193a	RNA Gene	22	GC17P031559	2.78917	https://www.genecards.org/cgi-bin/carddisp.pl?gene=MIR193A
YAP1	Yes1 Associated Transcriptional Regulator	Protein Coding	55	GC11P102110	2.78518	https://www.genecards.org/cgi-bin/carddisp.pl?gene=YAP1
NOS3	Nitric Oxide Synthase 3	Protein Coding	56	GC07P150990	2.7688	https://www.genecards.org/cgi-bin/carddisp.pl?gene=NOS3
EDN1	Endothelin 1	Protein Coding	55	GC06P012256	2.7688	https://www.genecards.org/cgi-bin/carddisp.pl?gene=EDN1
MIR139	MicroRNA 139	RNA Gene	23	GC11M072615	2.75384	https://www.genecards.org/cgi-bin/carddisp.pl?gene=MIR139
GSTA1	Glutathione S-Transferase Alpha 1	Protein Coding	48	GC06M052791	2.7318	https://www.genecards.org/cgi-bin/carddisp.pl?gene=GSTA1
ATM	ATM Serine/Threonine Kinase	Protein Coding	60	GC11P108222	2.72007	https://www.genecards.org/cgi-bin/carddisp.pl?gene=ATM
IGF1	Insulin Like Growth Factor 1	Protein Coding	55	GC12M102395	2.72007	https://www.genecards.org/cgi-bin/carddisp.pl?gene=IGF1
MSH6	MutS Homolog 6	Protein Coding	55	GC02P047695	2.69885	https://www.genecards.org/cgi-bin/carddisp.pl?gene=MSH6
CYP2C19	Cytochrome P450 Family 2 Subfamily C Member 19	Protein Coding	52	GC10P094762	2.69885	https://www.genecards.org/cgi-bin/carddisp.pl?gene=CYP2C19
RAD23B	RAD23 Homolog B, Nucleotide Excision Repair Protein	Protein Coding	51	GC09P107283	2.69885	https://www.genecards.org/cgi-bin/carddisp.pl?gene=RAD23B
SLC2A1	Solute Carrier Family 2 Member 1	Protein Coding	60	GC01M042925	2.6771	https://www.genecards.org/cgi-bin/carddisp.pl?gene=SLC2A1
XRCC5	X-Ray Repair Cross Complementing 5	Protein Coding	51	GC02P216107	2.6771	https://www.genecards.org/cgi-bin/carddisp.pl?gene=XRCC5
FOXM1	Forkhead Box M1	Protein Coding	50	GC12M002857	2.67477	https://www.genecards.org/cgi-bin/carddisp.pl?gene=FOXM1
CYP3A4	Cytochrome P450 Family 3 Subfamily A Member 4	Protein Coding	56	GC07M099759	2.66601	https://www.genecards.org/cgi-bin/carddisp.pl?gene=CYP3A4
CERS2	Ceramide Synthase 2	Protein Coding	48	GC01M150960	2.66449	https://www.genecards.org/cgi-bin/carddisp.pl?gene=CERS2
UHRF1	Ubiquitin Like With PHD And Ring Finger Domains 1	Protein Coding	46	GC19P005008	2.63458	https://www.genecards.org/cgi-bin/carddisp.pl?gene=UHRF1
IL1RN	Interleukin 1 Receptor Antagonist	Protein Coding	57	GC02P123802	2.63181	https://www.genecards.org/cgi-bin/carddisp.pl?gene=IL1RN
XPA	XPA, DNA Damage Recognition And Repair Factor	Protein Coding	51	GC09M097654	2.63181	https://www.genecards.org/cgi-bin/carddisp.pl?gene=XPA
XRCC2	X-Ray Repair Cross Complementing 2	Protein Coding	47	GC07M152644	2.63181	https://www.genecards.org/cgi-bin/carddisp.pl?gene=XRCC2
IGF2	Insulin Like Growth Factor 2	Protein Coding	55	GC11M004506	2.62008	https://www.genecards.org/cgi-bin/carddisp.pl?gene=IGF2
IL13	Interleukin 13	Protein Coding	50	GC05P132656	2.5965	https://www.genecards.org/cgi-bin/carddisp.pl?gene=IL13
ADAR	Adenosine Deaminase RNA Specific	Protein Coding	52	GC01M154599	2.58473	https://www.genecards.org/cgi-bin/carddisp.pl?gene=ADAR
VDR	Vitamin D Receptor	Protein Coding	56	GC12M047841	2.58377	https://www.genecards.org/cgi-bin/carddisp.pl?gene=VDR
TFF1	Trefoil Factor 1	Protein Coding	49	GC21M042362	2.58319	https://www.genecards.org/cgi-bin/carddisp.pl?gene=TFF1
RUNX3	RUNX Family Transcription Factor 3	Protein Coding	50	GC01M024899	2.58316	https://www.genecards.org/cgi-bin/carddisp.pl?gene=RUNX3
TFF3	Trefoil Factor 3	Protein Coding	47	GC21M042311	2.56223	https://www.genecards.org/cgi-bin/carddisp.pl?gene=TFF3
POLB	DNA Polymerase Beta	Protein Coding	51	GC08P042338	2.55854	https://www.genecards.org/cgi-bin/carddisp.pl?gene=POLB
CYP2C9	Cytochrome P450 Family 2 Subfamily C Member 9	Protein Coding	53	GC10P094938	2.55657	https://www.genecards.org/cgi-bin/carddisp.pl?gene=CYP2C9
MIR155	MicroRNA 155	RNA Gene	23	GC21P025573	2.55008	https://www.genecards.org/cgi-bin/carddisp.pl?gene=MIR155
ADARB1	Adenosine Deaminase RNA Specific B1	Protein Coding	51	GC21P045073	2.54156	https://www.genecards.org/cgi-bin/carddisp.pl?gene=ADARB1
MIR141	MicroRNA 141	RNA Gene	24	GC12P023565	2.53508	https://www.genecards.org/cgi-bin/carddisp.pl?gene=MIR141
RAF1	Raf-1 Proto-Oncogene, Serine/Threonine Kinase	Protein Coding	61	GC03M012583	2.53082	https://www.genecards.org/cgi-bin/carddisp.pl?gene=RAF1
RARB	Retinoic Acid Receptor Beta	Protein Coding	56	GC03P024689	2.5207	https://www.genecards.org/cgi-bin/carddisp.pl?gene=RARB
KISS1	KiSS-1 Metastasis Suppressor	Protein Coding	48	GC01M204190	2.51601	https://www.genecards.org/cgi-bin/carddisp.pl?gene=KISS1
KMT2D	Lysine Methyltransferase 2D	Protein Coding	50	GC12M049018	2.51182	https://www.genecards.org/cgi-bin/carddisp.pl?gene=KMT2D
METTL3	Methyltransferase 3, N6-Adenosine-Methyltransferase Complex Catalytic Subunit	Protein Coding	48	GC14M021498	2.50945	https://www.genecards.org/cgi-bin/carddisp.pl?gene=METTL3
AHR	Aryl Hydrocarbon Receptor	Protein Coding	54	GC07P016916	2.49872	https://www.genecards.org/cgi-bin/carddisp.pl?gene=AHR
RAD51	RAD51 Recombinase	Protein Coding	57	GC15P040694	2.48662	https://www.genecards.org/cgi-bin/carddisp.pl?gene=RAD51
MIR335	MicroRNA 335	RNA Gene	22	GC07P130496	2.46519	https://www.genecards.org/cgi-bin/carddisp.pl?gene=MIR335
MMP8	Matrix Metallopeptidase 8	Protein Coding	55	GC11M102712	2.45477	https://www.genecards.org/cgi-bin/carddisp.pl?gene=MMP8
ARHGDIB	Rho GDP Dissociation Inhibitor Beta	Protein Coding	48	GC12M014942	2.45008	https://www.genecards.org/cgi-bin/carddisp.pl?gene=ARHGDIB
RAD54L	RAD54 Like	Protein Coding	53	GC01P046365	2.40734	https://www.genecards.org/cgi-bin/carddisp.pl?gene=RAD54L
SLC19A1	Solute Carrier Family 19 Member 1	Protein Coding	52	GC21M045493	2.40479	https://www.genecards.org/cgi-bin/carddisp.pl?gene=SLC19A1
GRN	Granulin Precursor	Protein Coding	55	GC17P044345	2.40001	https://www.genecards.org/cgi-bin/carddisp.pl?gene=GRN
MIR200C	MicroRNA 200c	RNA Gene	25	GC12P023564	2.39817	https://www.genecards.org/cgi-bin/carddisp.pl?gene=MIR200C
CTLA4	Cytotoxic T-Lymphocyte Associated Protein 4	Protein Coding	54	GC02P203854	2.39579	https://www.genecards.org/cgi-bin/carddisp.pl?gene=CTLA4
MAP2K2	Mitogen-Activated Protein Kinase Kinase 2	Protein Coding	61	GC19M004090	2.395	https://www.genecards.org/cgi-bin/carddisp.pl?gene=MAP2K2
FASN	Fatty Acid Synthase	Protein Coding	55	GC17M082078	2.38935	https://www.genecards.org/cgi-bin/carddisp.pl?gene=FASN
UGT2B7	UDP Glucuronosyltransferase Family 2 Member B7	Protein Coding	50	GC04P069051	2.38861	https://www.genecards.org/cgi-bin/carddisp.pl?gene=UGT2B7
ILK	Integrin Linked Kinase	Protein Coding	52	GC11P006604	2.37705	https://www.genecards.org/cgi-bin/carddisp.pl?gene=ILK
CXCL12	C-X-C Motif Chemokine Ligand 12	Protein Coding	51	GC10M044370	2.37705	https://www.genecards.org/cgi-bin/carddisp.pl?gene=CXCL12
SNAI1	Snail Family Transcriptional Repressor 1	Protein Coding	51	GC20P049982	2.35981	https://www.genecards.org/cgi-bin/carddisp.pl?gene=SNAI1
MMP12	Matrix Metallopeptidase 12	Protein Coding	53	GC11M102862	2.34773	https://www.genecards.org/cgi-bin/carddisp.pl?gene=MMP12
PRRC2C	Proline Rich Coiled-Coil 2C	Protein Coding	40	GC01P171486	2.33405	https://www.genecards.org/cgi-bin/carddisp.pl?gene=PRRC2C
KDM6A	Lysine Demethylase 6A	Protein Coding	55	GC0XP044873	2.33158	https://www.genecards.org/cgi-bin/carddisp.pl?gene=KDM6A
SOX2	SRY-Box Transcription Factor 2	Protein Coding	52	GC03P181711	2.32901	https://www.genecards.org/cgi-bin/carddisp.pl?gene=SOX2
IL18	Interleukin 18	Protein Coding	50	GC11M112143	2.32376	https://www.genecards.org/cgi-bin/carddisp.pl?gene=IL18
MMP7	Matrix Metallopeptidase 7	Protein Coding	53	GC11M102425	2.3165	https://www.genecards.org/cgi-bin/carddisp.pl?gene=MMP7
NNAT	Neuronatin	Protein Coding	36	GC20P037521	2.31042	https://www.genecards.org/cgi-bin/carddisp.pl?gene=NNAT
NCOA3	Nuclear Receptor Coactivator 3	Protein Coding	54	GC20P047501	2.30664	https://www.genecards.org/cgi-bin/carddisp.pl?gene=NCOA3
GSK3B	Glycogen Synthase Kinase 3 Beta	Protein Coding	57	GC03M119821	2.30538	https://www.genecards.org/cgi-bin/carddisp.pl?gene=GSK3B
LIG1	DNA Ligase 1	Protein Coding	53	GC19M048115	2.30538	https://www.genecards.org/cgi-bin/carddisp.pl?gene=LIG1
POLD1	DNA Polymerase Delta 1, Catalytic Subunit	Protein Coding	52	GC19P073291	2.30538	https://www.genecards.org/cgi-bin/carddisp.pl?gene=POLD1
FOXO1	Forkhead Box O1	Protein Coding	56	GC13M040555	2.26419	https://www.genecards.org/cgi-bin/carddisp.pl?gene=FOXO1
ZEB2	Zinc Finger E-Box Binding Homeobox 2	Protein Coding	54	GC02M144384	2.25047	https://www.genecards.org/cgi-bin/carddisp.pl?gene=ZEB2
SP1	Sp1 Transcription Factor	Protein Coding	53	GC12P053380	2.25047	https://www.genecards.org/cgi-bin/carddisp.pl?gene=SP1
KLF4	KLF Transcription Factor 4	Protein Coding	52	GC09M107484	2.25047	https://www.genecards.org/cgi-bin/carddisp.pl?gene=KLF4
MIR214	MicroRNA 214	RNA Gene	25	GC01M172234	2.25041	https://www.genecards.org/cgi-bin/carddisp.pl?gene=MIR214
CBS	Cystathionine Beta-Synthase	Protein Coding	56	GC21M043053	2.24118	https://www.genecards.org/cgi-bin/carddisp.pl?gene=CBS
CTH	Cystathionine Gamma-Lyase	Protein Coding	56	GC01P070411	2.24118	https://www.genecards.org/cgi-bin/carddisp.pl?gene=CTH
SLC14A1	Solute Carrier Family 14 Member 1 (Kidd Blood Group)	Protein Coding	50	GC18P045687	2.23646	https://www.genecards.org/cgi-bin/carddisp.pl?gene=SLC14A1
MIR101-1	MicroRNA 101-1	RNA Gene	22	GC01M065058	2.21838	https://www.genecards.org/cgi-bin/carddisp.pl?gene=MIR101-1
PRKDC	Protein Kinase, DNA-Activated, Catalytic Subunit	Protein Coding	57	GC08M047773	2.21143	https://www.genecards.org/cgi-bin/carddisp.pl?gene=PRKDC
MTSS1	MTSS I-BAR Domain Containing 1	Protein Coding	47	GC08M124550	2.21143	https://www.genecards.org/cgi-bin/carddisp.pl?gene=MTSS1
BLM	BLM RecQ Like Helicase	Protein Coding	56	GC15P090717	2.20366	https://www.genecards.org/cgi-bin/carddisp.pl?gene=BLM
ADH1C	Alcohol Dehydrogenase 1C (Class I), Gamma Polypeptide	Protein Coding	47	GC04M099336	2.20366	https://www.genecards.org/cgi-bin/carddisp.pl?gene=ADH1C
MIR140	MicroRNA 140	RNA Gene	26	GC16P069934	2.20166	https://www.genecards.org/cgi-bin/carddisp.pl?gene=MIR140
IFNA1	Interferon Alpha 1	Protein Coding	45	GC09P021611	2.19892	https://www.genecards.org/cgi-bin/carddisp.pl?gene=IFNA1
MAPK14	Mitogen-Activated Protein Kinase 14	Protein Coding	58	GC06P092286	2.17325	https://www.genecards.org/cgi-bin/carddisp.pl?gene=MAPK14
ALDH1A1	Aldehyde Dehydrogenase 1 Family Member A1	Protein Coding	54	GC09M072900	2.17325	https://www.genecards.org/cgi-bin/carddisp.pl?gene=ALDH1A1
DCLK1	Doublecortin Like Kinase 1	Protein Coding	52	GC13M035768	2.16876	https://www.genecards.org/cgi-bin/carddisp.pl?gene=DCLK1
CCR2	C-C Motif Chemokine Receptor 2	Protein Coding	52	GC03P047614	2.15035	https://www.genecards.org/cgi-bin/carddisp.pl?gene=CCR2
ZEB1	Zinc Finger E-Box Binding Homeobox 1	Protein Coding	56	GC10P031318	2.14661	https://www.genecards.org/cgi-bin/carddisp.pl?gene=ZEB1
SDC1	Syndecan 1	Protein Coding	50	GC02M020200	2.14661	https://www.genecards.org/cgi-bin/carddisp.pl?gene=SDC1
POR	Cytochrome P450 Oxidoreductase	Protein Coding	56	GC07P075899	2.14509	https://www.genecards.org/cgi-bin/carddisp.pl?gene=POR
MT-CYB	Mitochondrially Encoded Cytochrome B	Protein Coding	38	GCMTP014749	2.14254	https://www.genecards.org/cgi-bin/carddisp.pl?gene=MT-CYB
EZR	Ezrin	Protein Coding	53	GC06M158765	2.13634	https://www.genecards.org/cgi-bin/carddisp.pl?gene=EZR
AKR1C3	Aldo-Keto Reductase Family 1 Member C3	Protein Coding	52	GC10P005035	2.13634	https://www.genecards.org/cgi-bin/carddisp.pl?gene=AKR1C3
IGFBP2	Insulin Like Growth Factor Binding Protein 2	Protein Coding	51	GC02P216632	2.13634	https://www.genecards.org/cgi-bin/carddisp.pl?gene=IGFBP2
UGT1A4	UDP Glucuronosyltransferase Family 1 Member A4	Protein Coding	49	GC02P233718	2.13634	https://www.genecards.org/cgi-bin/carddisp.pl?gene=UGT1A4
APOE	Apolipoprotein E	Protein Coding	57	GC19P073055	2.1355	https://www.genecards.org/cgi-bin/carddisp.pl?gene=APOE
MTDH	Metadherin	Protein Coding	47	GC08P097643	2.13289	https://www.genecards.org/cgi-bin/carddisp.pl?gene=MTDH
MIR150	MicroRNA 150	RNA Gene	24	GC19M049500	2.12888	https://www.genecards.org/cgi-bin/carddisp.pl?gene=MIR150
CD14	CD14 Molecule	Protein Coding	53	GC05M140631	2.12202	https://www.genecards.org/cgi-bin/carddisp.pl?gene=CD14
CXCR4	C-X-C Motif Chemokine Receptor 4	Protein Coding	59	GC02M136114	2.11888	https://www.genecards.org/cgi-bin/carddisp.pl?gene=CXCR4
MIR96	MicroRNA 96	RNA Gene	23	GC07M129774	2.10884	https://www.genecards.org/cgi-bin/carddisp.pl?gene=MIR96
MIR144	MicroRNA 144	RNA Gene	21	GC17M051196	2.10884	https://www.genecards.org/cgi-bin/carddisp.pl?gene=MIR144
ALDH2	Aldehyde Dehydrogenase 2 Family Member	Protein Coding	57	GC12P111766	2.10737	https://www.genecards.org/cgi-bin/carddisp.pl?gene=ALDH2
PMS2	PMS1 Homolog 2, Mismatch Repair System Component	Protein Coding	55	GC07M005973	2.10737	https://www.genecards.org/cgi-bin/carddisp.pl?gene=PMS2
PMS1	PMS1 Homolog 1, Mismatch Repair System Component	Protein Coding	48	GC02P189784	2.10737	https://www.genecards.org/cgi-bin/carddisp.pl?gene=PMS1
NFE2L2	NFE2 Like BZIP Transcription Factor 2	Protein Coding	57	GC02M177227	2.10456	https://www.genecards.org/cgi-bin/carddisp.pl?gene=NFE2L2
UGT1A	UDP Glucuronosyltransferase Family 1 Member A Complex Locus	Uncategorized	13	GC02P233592	2.10456	https://www.genecards.org/cgi-bin/carddisp.pl?gene=UGT1A
NQO2	N-Ribosyldihydronicotinamide:Quinone Reductase 2	Protein Coding	51	GC06P003332	2.1015	https://www.genecards.org/cgi-bin/carddisp.pl?gene=NQO2
HMGB1	High Mobility Group Box 1	Protein Coding	54	GC13M030456	2.09586	https://www.genecards.org/cgi-bin/carddisp.pl?gene=HMGB1
HMGA2	High Mobility Group AT-Hook 2	Protein Coding	50	GC12P065824	2.09586	https://www.genecards.org/cgi-bin/carddisp.pl?gene=HMGA2
TAAR1	Trace Amine Associated Receptor 1	Protein Coding	45	GC06M132644	2.09306	https://www.genecards.org/cgi-bin/carddisp.pl?gene=TAAR1
TCHH	Trichohyalin	Protein Coding	44	GC01M152106	2.09306	https://www.genecards.org/cgi-bin/carddisp.pl?gene=TCHH
NOMO1	NODAL Modulator 1	Protein Coding	42	GC16P017914	2.09306	https://www.genecards.org/cgi-bin/carddisp.pl?gene=NOMO1
SARNP	SAP Domain Containing Ribonucleoprotein	Protein Coding	42	GC12M055752	2.09306	https://www.genecards.org/cgi-bin/carddisp.pl?gene=SARNP
NOMO2	NODAL Modulator 2	Protein Coding	40	GC16M019401	2.09306	https://www.genecards.org/cgi-bin/carddisp.pl?gene=NOMO2
NOMO3	NODAL Modulator 3	Protein Coding	37	GC16P016232	2.09306	https://www.genecards.org/cgi-bin/carddisp.pl?gene=NOMO3
STAT1	Signal Transducer And Activator Of Transcription 1	Protein Coding	60	GC02M190908	2.09237	https://www.genecards.org/cgi-bin/carddisp.pl?gene=STAT1
FOXA1	Forkhead Box A1	Protein Coding	51	GC14M037589	2.08991	https://www.genecards.org/cgi-bin/carddisp.pl?gene=FOXA1
MIR200B	MicroRNA 200b	RNA Gene	24	GC01P001167	2.08991	https://www.genecards.org/cgi-bin/carddisp.pl?gene=MIR200B
MIR135A1	MicroRNA 135a-1	RNA Gene	22	GC03M052296	2.08788	https://www.genecards.org/cgi-bin/carddisp.pl?gene=MIR135A1
FANCA	FA Complementation Group A	Protein Coding	56	GC16M089841	2.07699	https://www.genecards.org/cgi-bin/carddisp.pl?gene=FANCA
HMOX1	Heme Oxygenase 1	Protein Coding	59	GC22P035380	2.07491	https://www.genecards.org/cgi-bin/carddisp.pl?gene=HMOX1
CYP2A6	Cytochrome P450 Family 2 Subfamily A Member 6	Protein Coding	53	GC19M040843	2.07491	https://www.genecards.org/cgi-bin/carddisp.pl?gene=CYP2A6
MIR24-1	MicroRNA 24-1	RNA Gene	21	GC09P095086	2.07409	https://www.genecards.org/cgi-bin/carddisp.pl?gene=MIR24-1
UNC5B	Unc-5 Netrin Receptor B	Protein Coding	47	GC10P071212	2.07106	https://www.genecards.org/cgi-bin/carddisp.pl?gene=UNC5B
RAB27B	RAB27B, Member RAS Oncogene Family	Protein Coding	45	GC18P054717	2.07066	https://www.genecards.org/cgi-bin/carddisp.pl?gene=RAB27B
APOB	Apolipoprotein B	Protein Coding	53	GC02M020956	2.06223	https://www.genecards.org/cgi-bin/carddisp.pl?gene=APOB
RXRA	Retinoid X Receptor Alpha	Protein Coding	56	GC09P134317	2.0612	https://www.genecards.org/cgi-bin/carddisp.pl?gene=RXRA
MIR124-3	MicroRNA 124-3	RNA Gene	20	GC20P063483	2.05834	https://www.genecards.org/cgi-bin/carddisp.pl?gene=MIR124-3
CCNH	Cyclin H	Protein Coding	53	GC05M087311	2.03609	https://www.genecards.org/cgi-bin/carddisp.pl?gene=CCNH
MIR217	MicroRNA 217	RNA Gene	22	GC02M055982	2.0322	https://www.genecards.org/cgi-bin/carddisp.pl?gene=MIR217
HGF	Hepatocyte Growth Factor	Protein Coding	58	GC07M081699	2.02751	https://www.genecards.org/cgi-bin/carddisp.pl?gene=HGF
YBX1	Y-Box Binding Protein 1	Protein Coding	46	GC01P042682	2.02751	https://www.genecards.org/cgi-bin/carddisp.pl?gene=YBX1
MIR9-1	MicroRNA 9-1	RNA Gene	23	GC01M156420	2.02388	https://www.genecards.org/cgi-bin/carddisp.pl?gene=MIR9-1
PLA2G2A	Phospholipase A2 Group IIA	Protein Coding	53	GC01M019975	2.02037	https://www.genecards.org/cgi-bin/carddisp.pl?gene=PLA2G2A
CDC25C	Cell Division Cycle 25C	Protein Coding	54	GC05M138285	2.01099	https://www.genecards.org/cgi-bin/carddisp.pl?gene=CDC25C
BIRC3	Baculoviral IAP Repeat Containing 3	Protein Coding	53	GC11P102317	2.01099	https://www.genecards.org/cgi-bin/carddisp.pl?gene=BIRC3
RAG1	Recombination Activating 1	Protein Coding	52	GC11P036542	2.00892	https://www.genecards.org/cgi-bin/carddisp.pl?gene=RAG1
SHMT1	Serine Hydroxymethyltransferase 1	Protein Coding	52	GC17M050956	2.00892	https://www.genecards.org/cgi-bin/carddisp.pl?gene=SHMT1
MT-ND2	Mitochondrially Encoded NADH:Ubiquinone Oxidoreductase Core Subunit 2	Protein Coding	40	GCMTP004472	2.00671	https://www.genecards.org/cgi-bin/carddisp.pl?gene=MT-ND2
AXIN2	Axin 2	Protein Coding	55	GC17M065528	1.99941	https://www.genecards.org/cgi-bin/carddisp.pl?gene=AXIN2
MIR186	MicroRNA 186	RNA Gene	22	GC01M071067	1.98756	https://www.genecards.org/cgi-bin/carddisp.pl?gene=MIR186
DHFR	Dihydrofolate Reductase	Protein Coding	55	GC05M080626	1.98059	https://www.genecards.org/cgi-bin/carddisp.pl?gene=DHFR
NOTCH2	Notch Receptor 2	Protein Coding	59	GC01M119911	1.9767	https://www.genecards.org/cgi-bin/carddisp.pl?gene=NOTCH2
VIM	Vimentin	Protein Coding	57	GC10P017227	1.9757	https://www.genecards.org/cgi-bin/carddisp.pl?gene=VIM
NNMT	Nicotinamide N-Methyltransferase	Protein Coding	51	GC11P114257	1.9757	https://www.genecards.org/cgi-bin/carddisp.pl?gene=NNMT
DRD2	Dopamine Receptor D2	Protein Coding	56	GC11M113409	1.97467	https://www.genecards.org/cgi-bin/carddisp.pl?gene=DRD2
CREBBP	CREB Binding Protein	Protein Coding	60	GC16M008258	1.97428	https://www.genecards.org/cgi-bin/carddisp.pl?gene=CREBBP
MYBL2	MYB Proto-Oncogene Like 2	Protein Coding	49	GC20P043667	1.96594	https://www.genecards.org/cgi-bin/carddisp.pl?gene=MYBL2
RGS6	Regulator Of G Protein Signaling 6	Protein Coding	47	GC14P071867	1.96594	https://www.genecards.org/cgi-bin/carddisp.pl?gene=RGS6
MYNN	Myoneurin	Protein Coding	44	GC03P169773	1.96594	https://www.genecards.org/cgi-bin/carddisp.pl?gene=MYNN
MGAT5	Alpha-1,6-Mannosylglycoprotein 6-Beta-N-Acetylglucosaminyltransferase	Protein Coding	48	GC02P134119	1.96205	https://www.genecards.org/cgi-bin/carddisp.pl?gene=MGAT5
RNASEL	Ribonuclease L	Protein Coding	50	GC01M182573	1.95987	https://www.genecards.org/cgi-bin/carddisp.pl?gene=RNASEL
CYP19A1	Cytochrome P450 Family 19 Subfamily A Member 1	Protein Coding	55	GC15M051208	1.95546	https://www.genecards.org/cgi-bin/carddisp.pl?gene=CYP19A1
DIABLO	Diablo IAP-Binding Mitochondrial Protein	Protein Coding	53	GC12M122497	1.95443	https://www.genecards.org/cgi-bin/carddisp.pl?gene=DIABLO
SOX4	SRY-Box Transcription Factor 4	Protein Coding	50	GC06P021593	1.95443	https://www.genecards.org/cgi-bin/carddisp.pl?gene=SOX4
CAT	Catalase	Protein Coding	58	GC11P034460	1.95094	https://www.genecards.org/cgi-bin/carddisp.pl?gene=CAT
BRIP1	BRCA1 Interacting Helicase 1	Protein Coding	54	GC17M061679	1.95094	https://www.genecards.org/cgi-bin/carddisp.pl?gene=BRIP1
EPHX2	Epoxide Hydrolase 2	Protein Coding	53	GC08P027490	1.95094	https://www.genecards.org/cgi-bin/carddisp.pl?gene=EPHX2
PTGS1	Prostaglandin-Endoperoxide Synthase 1	Protein Coding	53	GC09P122370	1.95094	https://www.genecards.org/cgi-bin/carddisp.pl?gene=PTGS1
FUT2	Fucosyltransferase 2	Protein Coding	52	GC19P048695	1.95094	https://www.genecards.org/cgi-bin/carddisp.pl?gene=FUT2
LIG3	DNA Ligase 3	Protein Coding	52	GC17P034980	1.95094	https://www.genecards.org/cgi-bin/carddisp.pl?gene=LIG3
ARNT	Aryl Hydrocarbon Receptor Nuclear Translocator	Protein Coding	51	GC01M150809	1.95094	https://www.genecards.org/cgi-bin/carddisp.pl?gene=ARNT
PARP4	Poly(ADP-Ribose) Polymerase Family Member 4	Protein Coding	50	GC13M024420	1.95094	https://www.genecards.org/cgi-bin/carddisp.pl?gene=PARP4
RAD52	RAD52 Homolog, DNA Repair Protein	Protein Coding	48	GC12M000912	1.95094	https://www.genecards.org/cgi-bin/carddisp.pl?gene=RAD52
SULT1A2	Sulfotransferase Family 1A Member 2	Protein Coding	48	GC16M028591	1.95094	https://www.genecards.org/cgi-bin/carddisp.pl?gene=SULT1A2
PARP3	Poly(ADP-Ribose) Polymerase Family Member 3	Protein Coding	47	GC03P052380	1.95094	https://www.genecards.org/cgi-bin/carddisp.pl?gene=PARP3
ZNF350	Zinc Finger Protein 350	Protein Coding	40	GC19M071040	1.95094	https://www.genecards.org/cgi-bin/carddisp.pl?gene=ZNF350
MIR133A1	MicroRNA 133a-1	RNA Gene	19	GC18M027630	1.94832	https://www.genecards.org/cgi-bin/carddisp.pl?gene=MIR133A1
LGALS3	Galectin 3	Protein Coding	52	GC14P055124	1.94705	https://www.genecards.org/cgi-bin/carddisp.pl?gene=LGALS3
SNCG	Synuclein Gamma	Protein Coding	48	GC10P094523	1.94705	https://www.genecards.org/cgi-bin/carddisp.pl?gene=SNCG
CXCL5	C-X-C Motif Chemokine Ligand 5	Protein Coding	47	GC04M073995	1.94705	https://www.genecards.org/cgi-bin/carddisp.pl?gene=CXCL5
CLPTM1L	CLPTM1 Like	Protein Coding	45	GC05M001317	1.94705	https://www.genecards.org/cgi-bin/carddisp.pl?gene=CLPTM1L
MIR1-1	MicroRNA 1-1	RNA Gene	22	GC20P063462	1.94705	https://www.genecards.org/cgi-bin/carddisp.pl?gene=MIR1-1
PIK3R2	Phosphoinositide-3-Kinase Regulatory Subunit 2	Protein Coding	56	GC19P018153	1.93484	https://www.genecards.org/cgi-bin/carddisp.pl?gene=PIK3R2
ARAF	A-Raf Proto-Oncogene, Serine/Threonine Kinase	Protein Coding	53	GC0XP047710	1.93484	https://www.genecards.org/cgi-bin/carddisp.pl?gene=ARAF
MADD	MAP Kinase Activating Death Domain	Protein Coding	51	GC11P047290	1.93484	https://www.genecards.org/cgi-bin/carddisp.pl?gene=MADD
UNC13D	Unc-13 Homolog D	Protein Coding	51	GC17M075827	1.93484	https://www.genecards.org/cgi-bin/carddisp.pl?gene=UNC13D
DAPK3	Death Associated Protein Kinase 3	Protein Coding	49	GC19M003958	1.93484	https://www.genecards.org/cgi-bin/carddisp.pl?gene=DAPK3
MLPH	Melanophilin	Protein Coding	49	GC02P237485	1.93484	https://www.genecards.org/cgi-bin/carddisp.pl?gene=MLPH
MYRIP	Myosin VIIA And Rab Interacting Protein	Protein Coding	46	GC03P040008	1.93484	https://www.genecards.org/cgi-bin/carddisp.pl?gene=MYRIP
RPH3A	Rabphilin 3A	Protein Coding	46	GC12P112570	1.93484	https://www.genecards.org/cgi-bin/carddisp.pl?gene=RPH3A
GCC2	GRIP And Coiled-Coil Domain Containing 2	Protein Coding	44	GC02P108432	1.93484	https://www.genecards.org/cgi-bin/carddisp.pl?gene=GCC2
RPH3AL	Rabphilin 3A Like (Without C2 Domains)	Protein Coding	44	GC17M000212	1.93484	https://www.genecards.org/cgi-bin/carddisp.pl?gene=RPH3AL
EXPH5	Exophilin 5	Protein Coding	43	GC11M108505	1.93484	https://www.genecards.org/cgi-bin/carddisp.pl?gene=EXPH5
SYTL4	Synaptotagmin Like 4	Protein Coding	43	GC0XM100674	1.93484	https://www.genecards.org/cgi-bin/carddisp.pl?gene=SYTL4
TBC1D10A	TBC1 Domain Family Member 10A	Protein Coding	43	GC22M030291	1.93484	https://www.genecards.org/cgi-bin/carddisp.pl?gene=TBC1D10A
SYTL3	Synaptotagmin Like 3	Protein Coding	42	GC06P158644	1.93484	https://www.genecards.org/cgi-bin/carddisp.pl?gene=SYTL3
SYTL5	Synaptotagmin Like 5	Protein Coding	40	GC0XP037889	1.93484	https://www.genecards.org/cgi-bin/carddisp.pl?gene=SYTL5
LBHD1	LBH Domain Containing 1	Protein Coding	29	GC11M099588	1.93187	https://www.genecards.org/cgi-bin/carddisp.pl?gene=LBHD1
SPINK1	Serine Peptidase Inhibitor Kazal Type 1	Protein Coding	48	GC05M147825	1.93167	https://www.genecards.org/cgi-bin/carddisp.pl?gene=SPINK1
HPSE	Heparanase	Protein Coding	52	GC04M083292	1.92963	https://www.genecards.org/cgi-bin/carddisp.pl?gene=HPSE
CIP2A	Cellular Inhibitor Of PP2A	Protein Coding	40	GC03M108581	1.92963	https://www.genecards.org/cgi-bin/carddisp.pl?gene=CIP2A
MIR130B	MicroRNA 130b	RNA Gene	22	GC22P045995	1.92735	https://www.genecards.org/cgi-bin/carddisp.pl?gene=MIR130B
TEP1	Telomerase Associated Protein 1	Protein Coding	47	GC14M020365	1.91977	https://www.genecards.org/cgi-bin/carddisp.pl?gene=TEP1
ROCK1	Rho Associated Coiled-Coil Containing Protein Kinase 1	Protein Coding	56	GC18M020946	1.91691	https://www.genecards.org/cgi-bin/carddisp.pl?gene=ROCK1
HEPACAM	Hepatic And Glial Cell Adhesion Molecule	Protein Coding	47	GC11M124919	1.91691	https://www.genecards.org/cgi-bin/carddisp.pl?gene=HEPACAM
DAB2IP	DAB2 Interacting Protein	Protein Coding	47	GC09P121566	1.91588	https://www.genecards.org/cgi-bin/carddisp.pl?gene=DAB2IP
METTL13	Methyltransferase 13, EEF1A Lysine And N-Terminal Methyltransferase	Protein Coding	44	GC01P171781	1.90744	https://www.genecards.org/cgi-bin/carddisp.pl?gene=METTL13
MIR370	MicroRNA 370	RNA Gene	23	GC14P110569	1.90531	https://www.genecards.org/cgi-bin/carddisp.pl?gene=MIR370
MIR582	MicroRNA 582	RNA Gene	22	GC05M059703	1.90531	https://www.genecards.org/cgi-bin/carddisp.pl?gene=MIR582
CSF2	Colony Stimulating Factor 2	Protein Coding	51	GC05P132073	1.90354	https://www.genecards.org/cgi-bin/carddisp.pl?gene=CSF2
IL12B	Interleukin 12B	Protein Coding	51	GC05M159314	1.90354	https://www.genecards.org/cgi-bin/carddisp.pl?gene=IL12B
MAPK3	Mitogen-Activated Protein Kinase 3	Protein Coding	56	GC16M038440	1.89965	https://www.genecards.org/cgi-bin/carddisp.pl?gene=MAPK3
VEGFD	Vascular Endothelial Growth Factor D	Protein Coding	47	GC0XM015345	1.89965	https://www.genecards.org/cgi-bin/carddisp.pl?gene=VEGFD
RNH1	Ribonuclease/Angiogenin Inhibitor 1	Protein Coding	44	GC11M004423	1.89965	https://www.genecards.org/cgi-bin/carddisp.pl?gene=RNH1
HMGN5	High Mobility Group Nucleosome Binding Domain 5	Protein Coding	38	GC0XM081113	1.89965	https://www.genecards.org/cgi-bin/carddisp.pl?gene=HMGN5
MIR218-1	MicroRNA 218-1	RNA Gene	21	GC04P020882	1.89965	https://www.genecards.org/cgi-bin/carddisp.pl?gene=MIR218-1
TFRC	Transferrin Receptor	Protein Coding	58	GC03M196056	1.88681	https://www.genecards.org/cgi-bin/carddisp.pl?gene=TFRC
BIRC2	Baculoviral IAP Repeat Containing 2	Protein Coding	53	GC11P102347	1.88681	https://www.genecards.org/cgi-bin/carddisp.pl?gene=BIRC2
ERCC3	ERCC Excision Repair 3, TFIIH Core Complex Helicase Subunit	Protein Coding	53	GC02M127257	1.88681	https://www.genecards.org/cgi-bin/carddisp.pl?gene=ERCC3
LTA	Lymphotoxin Alpha	Protein Coding	49	GC06P092152	1.88681	https://www.genecards.org/cgi-bin/carddisp.pl?gene=LTA
MIR125A	MicroRNA 125a	RNA Gene	23	GC19P073357	1.88367	https://www.genecards.org/cgi-bin/carddisp.pl?gene=MIR125A
FOXP3	Forkhead Box P3	Protein Coding	53	GC0XM049250	1.88293	https://www.genecards.org/cgi-bin/carddisp.pl?gene=FOXP3
CD4	CD4 Molecule	Protein Coding	57	GC12P006786	1.88225	https://www.genecards.org/cgi-bin/carddisp.pl?gene=CD4
ALAD	Aminolevulinate Dehydratase	Protein Coding	53	GC09M113386	1.88225	https://www.genecards.org/cgi-bin/carddisp.pl?gene=ALAD
CRP	C-Reactive Protein	Protein Coding	53	GC01M159729	1.88225	https://www.genecards.org/cgi-bin/carddisp.pl?gene=CRP
MIR210	MicroRNA 210	RNA Gene	23	GC11M004426	1.88201	https://www.genecards.org/cgi-bin/carddisp.pl?gene=MIR210
YY1	YY1 Transcription Factor	Protein Coding	55	GC14P100238	1.87732	https://www.genecards.org/cgi-bin/carddisp.pl?gene=YY1
MIR192	MicroRNA 192	RNA Gene	24	GC11M064891	1.87732	https://www.genecards.org/cgi-bin/carddisp.pl?gene=MIR192
SOD1	Superoxide Dismutase 1	Protein Coding	60	GC21P031659	1.86956	https://www.genecards.org/cgi-bin/carddisp.pl?gene=SOD1
ARL6IP5	ADP Ribosylation Factor Like GTPase 6 Interacting Protein 5	Protein Coding	43	GC03P069084	1.8636	https://www.genecards.org/cgi-bin/carddisp.pl?gene=ARL6IP5
IDO1	Indoleamine 2,3-Dioxygenase 1	Protein Coding	53	GC08P039891	1.8572	https://www.genecards.org/cgi-bin/carddisp.pl?gene=IDO1
IRF1	Interferon Regulatory Factor 1	Protein Coding	53	GC05M132440	1.85173	https://www.genecards.org/cgi-bin/carddisp.pl?gene=IRF1
IL5	Interleukin 5	Protein Coding	52	GC05M132541	1.85071	https://www.genecards.org/cgi-bin/carddisp.pl?gene=IL5
MIR7-1	MicroRNA 7-1	RNA Gene	19	GC09M096204	1.85071	https://www.genecards.org/cgi-bin/carddisp.pl?gene=MIR7-1
APOA2	Apolipoprotein A2	Protein Coding	52	GC01M161222	1.84839	https://www.genecards.org/cgi-bin/carddisp.pl?gene=APOA2
CCNB1	Cyclin B1	Protein Coding	53	GC05P069167	1.84784	https://www.genecards.org/cgi-bin/carddisp.pl?gene=CCNB1
SMAD2	SMAD Family Member 2	Protein Coding	59	GC18M047809	1.83527	https://www.genecards.org/cgi-bin/carddisp.pl?gene=SMAD2
MIR424	MicroRNA 424	RNA Gene	21	GC0XM134700	1.83346	https://www.genecards.org/cgi-bin/carddisp.pl?gene=MIR424
XBP1	X-Box Binding Protein 1	Protein Coding	52	GC22M028794	1.83324	https://www.genecards.org/cgi-bin/carddisp.pl?gene=XBP1
FBXW7	F-Box And WD Repeat Domain Containing 7	Protein Coding	51	GC04M152321	1.83324	https://www.genecards.org/cgi-bin/carddisp.pl?gene=FBXW7
EP300	E1A Binding Protein P300	Protein Coding	59	GC22P045272	1.83205	https://www.genecards.org/cgi-bin/carddisp.pl?gene=EP300
RHOC	Ras Homolog Family Member C	Protein Coding	48	GC01M112701	1.82062	https://www.genecards.org/cgi-bin/carddisp.pl?gene=RHOC
MIR490	MicroRNA 490	RNA Gene	19	GC07P136903	1.81563	https://www.genecards.org/cgi-bin/carddisp.pl?gene=MIR490
BAK1	BCL2 Antagonist/Killer 1	Protein Coding	52	GC06M033572	1.81403	https://www.genecards.org/cgi-bin/carddisp.pl?gene=BAK1
WWOX	WW Domain Containing Oxidoreductase	Protein Coding	52	GC16P078099	1.81014	https://www.genecards.org/cgi-bin/carddisp.pl?gene=WWOX
WIF1	WNT Inhibitory Factor 1	Protein Coding	51	GC12M065050	1.81014	https://www.genecards.org/cgi-bin/carddisp.pl?gene=WIF1
TEK	TEK Receptor Tyrosine Kinase	Protein Coding	58	GC09P027109	1.80562	https://www.genecards.org/cgi-bin/carddisp.pl?gene=TEK
PKM	Pyruvate Kinase M1/2	Protein Coding	56	GC15M072199	1.80562	https://www.genecards.org/cgi-bin/carddisp.pl?gene=PKM
PIM1	Pim-1 Proto-Oncogene, Serine/Threonine Kinase	Protein Coding	56	GC06P092302	1.80541	https://www.genecards.org/cgi-bin/carddisp.pl?gene=PIM1
IL4R	Interleukin 4 Receptor	Protein Coding	55	GC16P042490	1.80541	https://www.genecards.org/cgi-bin/carddisp.pl?gene=IL4R
MIR499A	MicroRNA 499a	RNA Gene	25	GC20P034990	1.79714	https://www.genecards.org/cgi-bin/carddisp.pl?gene=MIR499A
CDKN1C	Cyclin Dependent Kinase Inhibitor 1C	Protein Coding	52	GC11M004529	1.794	https://www.genecards.org/cgi-bin/carddisp.pl?gene=CDKN1C
GPX2	Glutathione Peroxidase 2	Protein Coding	48	GC14M064939	1.794	https://www.genecards.org/cgi-bin/carddisp.pl?gene=GPX2
TIMP1	TIMP Metallopeptidase Inhibitor 1	Protein Coding	52	GC0XP047711	1.7939	https://www.genecards.org/cgi-bin/carddisp.pl?gene=TIMP1
FOS	Fos Proto-Oncogene, AP-1 Transcription Factor Subunit	Protein Coding	57	GC14P075278	1.79041	https://www.genecards.org/cgi-bin/carddisp.pl?gene=FOS
NOTCH1	Notch Receptor 1	Protein Coding	60	GC09M137729	1.79024	https://www.genecards.org/cgi-bin/carddisp.pl?gene=NOTCH1
CXCL1	C-X-C Motif Chemokine Ligand 1	Protein Coding	50	GC04P073869	1.79024	https://www.genecards.org/cgi-bin/carddisp.pl?gene=CXCL1
CFH	Complement Factor H	Protein Coding	54	GC01P196621	1.77503	https://www.genecards.org/cgi-bin/carddisp.pl?gene=CFH
FOXO3	Forkhead Box O3	Protein Coding	53	GC06P108559	1.77445	https://www.genecards.org/cgi-bin/carddisp.pl?gene=FOXO3
ARID1A	AT-Rich Interaction Domain 1A	Protein Coding	52	GC01P026693	1.77445	https://www.genecards.org/cgi-bin/carddisp.pl?gene=ARID1A
XRCC6	X-Ray Repair Cross Complementing 6	Protein Coding	52	GC22P045321	1.77445	https://www.genecards.org/cgi-bin/carddisp.pl?gene=XRCC6
CD80	CD80 Molecule	Protein Coding	51	GC03M119524	1.75924	https://www.genecards.org/cgi-bin/carddisp.pl?gene=CD80
MAPK8	Mitogen-Activated Protein Kinase 8	Protein Coding	57	GC10P048306	1.75822	https://www.genecards.org/cgi-bin/carddisp.pl?gene=MAPK8
RPS6KB1	Ribosomal Protein S6 Kinase B1	Protein Coding	55	GC17P059893	1.75822	https://www.genecards.org/cgi-bin/carddisp.pl?gene=RPS6KB1
PTBP1	Polypyrimidine Tract Binding Protein 1	Protein Coding	50	GC19P000797	1.75822	https://www.genecards.org/cgi-bin/carddisp.pl?gene=PTBP1
MIR19B1	MicroRNA 19b-1	RNA Gene	20	GC13P091575	1.7579	https://www.genecards.org/cgi-bin/carddisp.pl?gene=MIR19B1
BUB1	BUB1 Mitotic Checkpoint Serine/Threonine Kinase	Protein Coding	56	GC02M110637	1.75728	https://www.genecards.org/cgi-bin/carddisp.pl?gene=BUB1
MLH3	MutL Homolog 3	Protein Coding	48	GC14M075013	1.75728	https://www.genecards.org/cgi-bin/carddisp.pl?gene=MLH3
KPNA2	Karyopherin Subunit Alpha 2	Protein Coding	52	GC17P068035	1.7471	https://www.genecards.org/cgi-bin/carddisp.pl?gene=KPNA2
PLCE1	Phospholipase C Epsilon 1	Protein Coding	52	GC10P093993	1.7471	https://www.genecards.org/cgi-bin/carddisp.pl?gene=PLCE1
MIR19A	MicroRNA 19a	RNA Gene	22	GC13P091579	1.74343	https://www.genecards.org/cgi-bin/carddisp.pl?gene=MIR19A
IGF2R	Insulin Like Growth Factor 2 Receptor	Protein Coding	52	GC06P159969	1.74301	https://www.genecards.org/cgi-bin/carddisp.pl?gene=IGF2R
GC	GC Vitamin D Binding Protein	Protein Coding	51	GC04M071741	1.74301	https://www.genecards.org/cgi-bin/carddisp.pl?gene=GC
GSTZ1	Glutathione S-Transferase Zeta 1	Protein Coding	48	GC14P077320	1.74301	https://www.genecards.org/cgi-bin/carddisp.pl?gene=GSTZ1
ABCG2	ATP Binding Cassette Subfamily G Member 2 (Junior Blood Group)	Protein Coding	56	GC04M088090	1.7415	https://www.genecards.org/cgi-bin/carddisp.pl?gene=ABCG2
MIF	Macrophage Migration Inhibitory Factor	Protein Coding	55	GC22P023894	1.7415	https://www.genecards.org/cgi-bin/carddisp.pl?gene=MIF
CTSB	Cathepsin B	Protein Coding	59	GC08M011842	1.72629	https://www.genecards.org/cgi-bin/carddisp.pl?gene=CTSB
CD40	CD40 Molecule	Protein Coding	57	GC20P046118	1.72629	https://www.genecards.org/cgi-bin/carddisp.pl?gene=CD40
CHEK1	Checkpoint Kinase 1	Protein Coding	56	GC11P125625	1.72629	https://www.genecards.org/cgi-bin/carddisp.pl?gene=CHEK1
RAC1	Rac Family Small GTPase 1	Protein Coding	55	GC07P006377	1.72629	https://www.genecards.org/cgi-bin/carddisp.pl?gene=RAC1
VCAM1	Vascular Cell Adhesion Molecule 1	Protein Coding	52	GC01P100719	1.72629	https://www.genecards.org/cgi-bin/carddisp.pl?gene=VCAM1
GDF15	Growth Differentiation Factor 15	Protein Coding	50	GC19P072428	1.72629	https://www.genecards.org/cgi-bin/carddisp.pl?gene=GDF15
WNT5A	Wnt Family Member 5A	Protein Coding	56	GC03M055465	1.72424	https://www.genecards.org/cgi-bin/carddisp.pl?gene=WNT5A
KRT6A	Keratin 6A	Protein Coding	51	GC12M052488	1.72424	https://www.genecards.org/cgi-bin/carddisp.pl?gene=KRT6A
H2AX	H2A.X Variant Histone	Protein Coding	50	GC11M119285	1.72424	https://www.genecards.org/cgi-bin/carddisp.pl?gene=H2AX
ACKR3	Atypical Chemokine Receptor 3	Protein Coding	49	GC02P236537	1.72424	https://www.genecards.org/cgi-bin/carddisp.pl?gene=ACKR3
PHLPP2	PH Domain And Leucine Rich Repeat Protein Phosphatase 2	Protein Coding	48	GC16M071637	1.72424	https://www.genecards.org/cgi-bin/carddisp.pl?gene=PHLPP2
HOXA9	Homeobox A9	Protein Coding	45	GC07M027162	1.72424	https://www.genecards.org/cgi-bin/carddisp.pl?gene=HOXA9
HAS1	Hyaluronan Synthase 1	Protein Coding	44	GC19M071024	1.72424	https://www.genecards.org/cgi-bin/carddisp.pl?gene=HAS1
CGB7	Chorionic Gonadotropin Subunit Beta 7	Protein Coding	38	GC19M049054	1.72424	https://www.genecards.org/cgi-bin/carddisp.pl?gene=CGB7
DCC	DCC Netrin 1 Receptor	Protein Coding	53	GC18P052340	1.71746	https://www.genecards.org/cgi-bin/carddisp.pl?gene=DCC
INSR	Insulin Receptor	Protein Coding	60	GC19M007112	1.70903	https://www.genecards.org/cgi-bin/carddisp.pl?gene=INSR
LEPR	Leptin Receptor	Protein Coding	57	GC01P065421	1.70903	https://www.genecards.org/cgi-bin/carddisp.pl?gene=LEPR
AMACR	Alpha-Methylacyl-CoA Racemase	Protein Coding	51	GC05M033986	1.70903	https://www.genecards.org/cgi-bin/carddisp.pl?gene=AMACR
HSD3B2	Hydroxy-Delta-5-Steroid Dehydrogenase, 3 Beta- And Steroid Delta-Isomerase 2	Protein Coding	51	GC01P119414	1.70903	https://www.genecards.org/cgi-bin/carddisp.pl?gene=HSD3B2
MMP13	Matrix Metallopeptidase 13	Protein Coding	57	GC11M102942	1.70641	https://www.genecards.org/cgi-bin/carddisp.pl?gene=MMP13
RALB	RAS Like Proto-Oncogene B	Protein Coding	50	GC02P120240	1.70641	https://www.genecards.org/cgi-bin/carddisp.pl?gene=RALB
TRPM7	Transient Receptor Potential Cation Channel Subfamily M Member 7	Protein Coding	50	GC15M050552	1.70641	https://www.genecards.org/cgi-bin/carddisp.pl?gene=TRPM7
CYP2A13	Cytochrome P450 Family 2 Subfamily A Member 13	Protein Coding	46	GC19P041088	1.70641	https://www.genecards.org/cgi-bin/carddisp.pl?gene=CYP2A13
EPHA2	EPH Receptor A2	Protein Coding	60	GC01M016124	1.70307	https://www.genecards.org/cgi-bin/carddisp.pl?gene=EPHA2
FOXQ1	Forkhead Box Q1	Protein Coding	41	GC06P001312	1.69899	https://www.genecards.org/cgi-bin/carddisp.pl?gene=FOXQ1
MIR126	MicroRNA 126	RNA Gene	25	GC09P136670	1.69159	https://www.genecards.org/cgi-bin/carddisp.pl?gene=MIR126
MIR197	MicroRNA 197	RNA Gene	21	GC01P109598	1.69159	https://www.genecards.org/cgi-bin/carddisp.pl?gene=MIR197
STK11	Serine/Threonine Kinase 11	Protein Coding	57	GC19P001177	1.6912	https://www.genecards.org/cgi-bin/carddisp.pl?gene=STK11
ABCC2	ATP Binding Cassette Subfamily C Member 2	Protein Coding	55	GC10P099782	1.6912	https://www.genecards.org/cgi-bin/carddisp.pl?gene=ABCC2
COL18A1	Collagen Type XVIII Alpha 1 Chain	Protein Coding	53	GC21P045405	1.6912	https://www.genecards.org/cgi-bin/carddisp.pl?gene=COL18A1
PHB1	Prohibitin 1	Protein Coding	53	GC17M052178	1.6912	https://www.genecards.org/cgi-bin/carddisp.pl?gene=PHB1
MTHFD2	Methylenetetrahydrofolate Dehydrogenase (NADP+ Dependent) 2, Methenyltetrahydrofolate Cyclohydrolase	Protein Coding	48	GC02P074186	1.6912	https://www.genecards.org/cgi-bin/carddisp.pl?gene=MTHFD2
JAK2	Janus Kinase 2	Protein Coding	60	GC09P004985	1.68906	https://www.genecards.org/cgi-bin/carddisp.pl?gene=JAK2
RELA	RELA Proto-Oncogene, NF-KB Subunit	Protein Coding	59	GC11M065653	1.68792	https://www.genecards.org/cgi-bin/carddisp.pl?gene=RELA
GJA1	Gap Junction Protein Alpha 1	Protein Coding	57	GC06P121436	1.68792	https://www.genecards.org/cgi-bin/carddisp.pl?gene=GJA1
ITGA3	Integrin Subunit Alpha 3	Protein Coding	55	GC17P050055	1.68792	https://www.genecards.org/cgi-bin/carddisp.pl?gene=ITGA3
IL6R	Interleukin 6 Receptor	Protein Coding	57	GC01P154405	1.67271	https://www.genecards.org/cgi-bin/carddisp.pl?gene=IL6R
CASP10	Caspase 10	Protein Coding	55	GC02P201182	1.67271	https://www.genecards.org/cgi-bin/carddisp.pl?gene=CASP10
TP53I3	Tumor Protein P53 Inducible Protein 3	Protein Coding	47	GC02M024078	1.67271	https://www.genecards.org/cgi-bin/carddisp.pl?gene=TP53I3
SLC39A2	Solute Carrier Family 39 Member 2	Protein Coding	43	GC14P034402	1.67271	https://www.genecards.org/cgi-bin/carddisp.pl?gene=SLC39A2
RRM1	Ribonucleotide Reductase Catalytic Subunit M1	Protein Coding	56	GC11P004115	1.66871	https://www.genecards.org/cgi-bin/carddisp.pl?gene=RRM1
ALKBH8	AlkB Homolog 8, TRNA Methyltransferase	Protein Coding	45	GC11M107502	1.66871	https://www.genecards.org/cgi-bin/carddisp.pl?gene=ALKBH8
MIR1247	MicroRNA 1247	RNA Gene	20	GC14M103212	1.66678	https://www.genecards.org/cgi-bin/carddisp.pl?gene=MIR1247
CARD10	Caspase Recruitment Domain Family Member 10	Protein Coding	46	GC22M061474	1.66009	https://www.genecards.org/cgi-bin/carddisp.pl?gene=CARD10
MSI2	Musashi RNA Binding Protein 2	Protein Coding	46	GC17P057255	1.66009	https://www.genecards.org/cgi-bin/carddisp.pl?gene=MSI2
MIR148A	MicroRNA 148a	RNA Gene	22	GC07M025950	1.66009	https://www.genecards.org/cgi-bin/carddisp.pl?gene=MIR148A
MIR325	MicroRNA 325	RNA Gene	16	GC0XM077005	1.66009	https://www.genecards.org/cgi-bin/carddisp.pl?gene=MIR325
BUB1B	BUB1 Mitotic Checkpoint Serine/Threonine Kinase B	Protein Coding	56	GC15P040161	1.65983	https://www.genecards.org/cgi-bin/carddisp.pl?gene=BUB1B
IRS1	Insulin Receptor Substrate 1	Protein Coding	53	GC02M226731	1.6535	https://www.genecards.org/cgi-bin/carddisp.pl?gene=IRS1
LEP	Leptin	Protein Coding	53	GC07P128241	1.6535	https://www.genecards.org/cgi-bin/carddisp.pl?gene=LEP
GPX4	Glutathione Peroxidase 4	Protein Coding	52	GC19P001103	1.6535	https://www.genecards.org/cgi-bin/carddisp.pl?gene=GPX4
IL15	Interleukin 15	Protein Coding	49	GC04P141636	1.6535	https://www.genecards.org/cgi-bin/carddisp.pl?gene=IL15
PPP1R13L	Protein Phosphatase 1 Regulatory Subunit 13 Like	Protein Coding	47	GC19M045379	1.6535	https://www.genecards.org/cgi-bin/carddisp.pl?gene=PPP1R13L
AXL	AXL Receptor Tyrosine Kinase	Protein Coding	59	GC19P041219	1.64868	https://www.genecards.org/cgi-bin/carddisp.pl?gene=AXL
AGTR1	Angiotensin II Receptor Type 1	Protein Coding	58	GC03P148697	1.64868	https://www.genecards.org/cgi-bin/carddisp.pl?gene=AGTR1
MIR27A	MicroRNA 27a	RNA Gene	26	GC19M014656	1.64868	https://www.genecards.org/cgi-bin/carddisp.pl?gene=MIR27A
MIR125B1	MicroRNA 125b-1	RNA Gene	24	GC11M122100	1.64868	https://www.genecards.org/cgi-bin/carddisp.pl?gene=MIR125B1
GLI1	GLI Family Zinc Finger 1	Protein Coding	56	GC12P057616	1.64509	https://www.genecards.org/cgi-bin/carddisp.pl?gene=GLI1
MIR146B	MicroRNA 146b	RNA Gene	24	GC10P102436	1.64012	https://www.genecards.org/cgi-bin/carddisp.pl?gene=MIR146B
NOD2	Nucleotide Binding Oligomerization Domain Containing 2	Protein Coding	55	GC16P050693	1.63347	https://www.genecards.org/cgi-bin/carddisp.pl?gene=NOD2
CBR3	Carbonyl Reductase 3	Protein Coding	48	GC21P036182	1.63347	https://www.genecards.org/cgi-bin/carddisp.pl?gene=CBR3
NINJ1	Ninjurin 1	Protein Coding	47	GC09M093121	1.63347	https://www.genecards.org/cgi-bin/carddisp.pl?gene=NINJ1
NEDD4	NEDD4 E3 Ubiquitin Protein Ligase	Protein Coding	54	GC15M055826	1.62971	https://www.genecards.org/cgi-bin/carddisp.pl?gene=NEDD4
ESRRA	Estrogen Related Receptor Alpha	Protein Coding	53	GC11P064305	1.62971	https://www.genecards.org/cgi-bin/carddisp.pl?gene=ESRRA
KRT5	Keratin 5	Protein Coding	52	GC12M052514	1.62771	https://www.genecards.org/cgi-bin/carddisp.pl?gene=KRT5
ID1	Inhibitor Of DNA Binding 1	Protein Coding	47	GC20P031605	1.61392	https://www.genecards.org/cgi-bin/carddisp.pl?gene=ID1
GOLPH3	Golgi Phosphoprotein 3	Protein Coding	45	GC05M032124	1.61392	https://www.genecards.org/cgi-bin/carddisp.pl?gene=GOLPH3
TNKS	Tankyrase	Protein Coding	52	GC08P009555	1.6125	https://www.genecards.org/cgi-bin/carddisp.pl?gene=TNKS
TERF1	Telomeric Repeat Binding Factor 1	Protein Coding	48	GC08P073003	1.6125	https://www.genecards.org/cgi-bin/carddisp.pl?gene=TERF1
DHDH	Dihydrodiol Dehydrogenase	Protein Coding	42	GC19P073205	1.6125	https://www.genecards.org/cgi-bin/carddisp.pl?gene=DHDH
KRT14	Keratin 14	Protein Coding	53	GC17M041582	1.60567	https://www.genecards.org/cgi-bin/carddisp.pl?gene=KRT14
MIR16-1	MicroRNA 16-1	RNA Gene	22	GC13M050048	1.60567	https://www.genecards.org/cgi-bin/carddisp.pl?gene=MIR16-1
LAMC2	Laminin Subunit Gamma 2	Protein Coding	54	GC01P183186	1.59769	https://www.genecards.org/cgi-bin/carddisp.pl?gene=LAMC2
SATB1	SATB Homeobox 1	Protein Coding	51	GC03M021920	1.59769	https://www.genecards.org/cgi-bin/carddisp.pl?gene=SATB1
LRIG1	Leucine Rich Repeats And Immunoglobulin Like Domains 1	Protein Coding	49	GC03M066379	1.59769	https://www.genecards.org/cgi-bin/carddisp.pl?gene=LRIG1
RGS2	Regulator Of G Protein Signaling 2	Protein Coding	48	GC01P192809	1.59769	https://www.genecards.org/cgi-bin/carddisp.pl?gene=RGS2
SENP2	SUMO Specific Peptidase 2	Protein Coding	47	GC03P185582	1.59769	https://www.genecards.org/cgi-bin/carddisp.pl?gene=SENP2
BTG2	BTG Anti-Proliferation Factor 2	Protein Coding	45	GC01P203305	1.59769	https://www.genecards.org/cgi-bin/carddisp.pl?gene=BTG2
MIR196A2	MicroRNA 196a-2	RNA Gene	25	GC12P055232	1.59769	https://www.genecards.org/cgi-bin/carddisp.pl?gene=MIR196A2
MIR27B	MicroRNA 27b	RNA Gene	23	GC09P095102	1.59769	https://www.genecards.org/cgi-bin/carddisp.pl?gene=MIR27B
S100A9	S100 Calcium Binding Protein A9	Protein Coding	50	GC01P153357	1.58237	https://www.genecards.org/cgi-bin/carddisp.pl?gene=S100A9
EIF5A2	Eukaryotic Translation Initiation Factor 5A2	Protein Coding	46	GC03M170888	1.58237	https://www.genecards.org/cgi-bin/carddisp.pl?gene=EIF5A2
HPGD	15-Hydroxyprostaglandin Dehydrogenase	Protein Coding	53	GC04M174490	1.58097	https://www.genecards.org/cgi-bin/carddisp.pl?gene=HPGD
HAS2	Hyaluronan Synthase 2	Protein Coding	47	GC08M121594	1.58097	https://www.genecards.org/cgi-bin/carddisp.pl?gene=HAS2
UGT1A7	UDP Glucuronosyltransferase Family 1 Member A7	Protein Coding	47	GC02P233681	1.58097	https://www.genecards.org/cgi-bin/carddisp.pl?gene=UGT1A7
KLF8	KLF Transcription Factor 8	Protein Coding	44	GC0XP055910	1.58097	https://www.genecards.org/cgi-bin/carddisp.pl?gene=KLF8
DPYD	Dihydropyrimidine Dehydrogenase	Protein Coding	59	GC01M097015	1.56371	https://www.genecards.org/cgi-bin/carddisp.pl?gene=DPYD
RAD50	RAD50 Double Strand Break Repair Protein	Protein Coding	56	GC05P132556	1.56371	https://www.genecards.org/cgi-bin/carddisp.pl?gene=RAD50
ANGPT2	Angiopoietin 2	Protein Coding	55	GC08M006499	1.56371	https://www.genecards.org/cgi-bin/carddisp.pl?gene=ANGPT2
PON1	Paraoxonase 1	Protein Coding	55	GC07M095297	1.56371	https://www.genecards.org/cgi-bin/carddisp.pl?gene=PON1
ANGPT1	Angiopoietin 1	Protein Coding	53	GC08M107246	1.56371	https://www.genecards.org/cgi-bin/carddisp.pl?gene=ANGPT1
FTO	FTO Alpha-Ketoglutarate Dependent Dioxygenase	Protein Coding	53	GC16P053873	1.56371	https://www.genecards.org/cgi-bin/carddisp.pl?gene=FTO
GSTO1	Glutathione S-Transferase Omega 1	Protein Coding	52	GC10P104235	1.56371	https://www.genecards.org/cgi-bin/carddisp.pl?gene=GSTO1
HNRNPK	Heterogeneous Nuclear Ribonucleoprotein K	Protein Coding	52	GC09M096203	1.56371	https://www.genecards.org/cgi-bin/carddisp.pl?gene=HNRNPK
CYP3A5	Cytochrome P450 Family 3 Subfamily A Member 5	Protein Coding	51	GC07M099648	1.56371	https://www.genecards.org/cgi-bin/carddisp.pl?gene=CYP3A5
IL17A	Interleukin 17A	Protein Coding	50	GC06P052186	1.56371	https://www.genecards.org/cgi-bin/carddisp.pl?gene=IL17A
NDRG2	NDRG Family Member 2	Protein Coding	45	GC14M021016	1.56371	https://www.genecards.org/cgi-bin/carddisp.pl?gene=NDRG2
UBD	Ubiquitin D	Protein Coding	44	GC06M071592	1.56371	https://www.genecards.org/cgi-bin/carddisp.pl?gene=UBD
MIR451A	MicroRNA 451a	RNA Gene	19	GC17M028861	1.56371	https://www.genecards.org/cgi-bin/carddisp.pl?gene=MIR451A
HSPA4	Heat Shock Protein Family A (Hsp70) Member 4	Protein Coding	49	GC05P133054	1.55756	https://www.genecards.org/cgi-bin/carddisp.pl?gene=HSPA4
ELAVL1	ELAV Like RNA Binding Protein 1	Protein Coding	47	GC19M007958	1.55756	https://www.genecards.org/cgi-bin/carddisp.pl?gene=ELAVL1
POU5F1B	POU Class 5 Homeobox 1B	Protein Coding	38	GC08P127322	1.55756	https://www.genecards.org/cgi-bin/carddisp.pl?gene=POU5F1B
NR1H4	Nuclear Receptor Subfamily 1 Group H Member 4	Protein Coding	55	GC12P100473	1.55259	https://www.genecards.org/cgi-bin/carddisp.pl?gene=NR1H4
MIR494	MicroRNA 494	RNA Gene	19	GC14P110928	1.54588	https://www.genecards.org/cgi-bin/carddisp.pl?gene=MIR494
MIR93	MicroRNA 93	RNA Gene	24	GC07M102257	1.54268	https://www.genecards.org/cgi-bin/carddisp.pl?gene=MIR93
MIR183	MicroRNA 183	RNA Gene	22	GC07M129844	1.54268	https://www.genecards.org/cgi-bin/carddisp.pl?gene=MIR183
MIR330	MicroRNA 330	RNA Gene	22	GC19M070743	1.54268	https://www.genecards.org/cgi-bin/carddisp.pl?gene=MIR330
MIR224	MicroRNA 224	RNA Gene	19	GC0XM151958	1.54268	https://www.genecards.org/cgi-bin/carddisp.pl?gene=MIR224
ALOX5	Arachidonate 5-Lipoxygenase	Protein Coding	54	GC10P045374	1.53587	https://www.genecards.org/cgi-bin/carddisp.pl?gene=ALOX5
ALOX12	Arachidonate 12-Lipoxygenase, 12S Type	Protein Coding	51	GC17P006995	1.53587	https://www.genecards.org/cgi-bin/carddisp.pl?gene=ALOX12
WEE1	WEE1 G2 Checkpoint Kinase	Protein Coding	54	GC11P009573	1.5309	https://www.genecards.org/cgi-bin/carddisp.pl?gene=WEE1
SLC11A1	Solute Carrier Family 11 Member 1	Protein Coding	53	GC02P218382	1.5309	https://www.genecards.org/cgi-bin/carddisp.pl?gene=SLC11A1
GJB2	Gap Junction Protein Beta 2	Protein Coding	52	GC13M020187	1.5309	https://www.genecards.org/cgi-bin/carddisp.pl?gene=GJB2
PIWIL2	Piwi Like RNA-Mediated Gene Silencing 2	Protein Coding	43	GC08P022275	1.5309	https://www.genecards.org/cgi-bin/carddisp.pl?gene=PIWIL2
PAK1	P21 (RAC1) Activated Kinase 1	Protein Coding	57	GC11M100100	1.52739	https://www.genecards.org/cgi-bin/carddisp.pl?gene=PAK1
PIK3CG	Phosphatidylinositol-4,5-Bisphosphate 3-Kinase Catalytic Subunit Gamma	Protein Coding	55	GC07P106865	1.52739	https://www.genecards.org/cgi-bin/carddisp.pl?gene=PIK3CG
ABCC3	ATP Binding Cassette Subfamily C Member 3	Protein Coding	53	GC17P050634	1.52739	https://www.genecards.org/cgi-bin/carddisp.pl?gene=ABCC3
NR4A2	Nuclear Receptor Subfamily 4 Group A Member 2	Protein Coding	53	GC02M156324	1.52739	https://www.genecards.org/cgi-bin/carddisp.pl?gene=NR4A2
BECN1	Beclin 1	Protein Coding	52	GC17M042810	1.52739	https://www.genecards.org/cgi-bin/carddisp.pl?gene=BECN1
SKP2	S-Phase Kinase Associated Protein 2	Protein Coding	50	GC05P036151	1.52739	https://www.genecards.org/cgi-bin/carddisp.pl?gene=SKP2
APOBEC3A	Apolipoprotein B MRNA Editing Enzyme Catalytic Subunit 3A	Protein Coding	44	GC22P038952	1.52739	https://www.genecards.org/cgi-bin/carddisp.pl?gene=APOBEC3A
CDCA3	Cell Division Cycle Associated 3	Protein Coding	44	GC12M006844	1.52739	https://www.genecards.org/cgi-bin/carddisp.pl?gene=CDCA3
FCGR2A	Fc Gamma Receptor IIa	Protein Coding	55	GC01P161505	1.51862	https://www.genecards.org/cgi-bin/carddisp.pl?gene=FCGR2A
MIR675	MicroRNA 675	RNA Gene	22	GC11M004503	1.50974	https://www.genecards.org/cgi-bin/carddisp.pl?gene=MIR675
MIR532	MicroRNA 532	RNA Gene	19	GC0XP051216	1.50974	https://www.genecards.org/cgi-bin/carddisp.pl?gene=MIR532
G6PD	Glucose-6-Phosphate Dehydrogenase	Protein Coding	57	GC0XM154562	1.50818	https://www.genecards.org/cgi-bin/carddisp.pl?gene=G6PD
TNC	Tenascin C	Protein Coding	56	GC09M115019	1.50818	https://www.genecards.org/cgi-bin/carddisp.pl?gene=TNC
PML	PML Nuclear Body Scaffold	Protein Coding	53	GC15P073994	1.50818	https://www.genecards.org/cgi-bin/carddisp.pl?gene=PML
CEACAM1	CEA Cell Adhesion Molecule 1	Protein Coding	51	GC19M042507	1.50818	https://www.genecards.org/cgi-bin/carddisp.pl?gene=CEACAM1
NCOR1	Nuclear Receptor Corepressor 1	Protein Coding	51	GC17M016029	1.50818	https://www.genecards.org/cgi-bin/carddisp.pl?gene=NCOR1
CTTN	Cortactin	Protein Coding	50	GC11P070398	1.50818	https://www.genecards.org/cgi-bin/carddisp.pl?gene=CTTN
MIR107	MicroRNA 107	RNA Gene	23	GC10M089604	1.50818	https://www.genecards.org/cgi-bin/carddisp.pl?gene=MIR107
CASC9	Cancer Susceptibility 9	RNA Gene	18	GC08M075132	1.50818	https://www.genecards.org/cgi-bin/carddisp.pl?gene=CASC9
MCM7	Minichromosome Maintenance Complex Component 7	Protein Coding	52	GC07M100092	1.50192	https://www.genecards.org/cgi-bin/carddisp.pl?gene=MCM7
IL12A	Interleukin 12A	Protein Coding	51	GC03P159988	1.50078	https://www.genecards.org/cgi-bin/carddisp.pl?gene=IL12A
MIR26A1	MicroRNA 26a-1	RNA Gene	23	GC03P037969	1.49951	https://www.genecards.org/cgi-bin/carddisp.pl?gene=MIR26A1
NEU1	Neuraminidase 1	Protein Coding	52	GC06M031857	1.49864	https://www.genecards.org/cgi-bin/carddisp.pl?gene=NEU1
MIR149	MicroRNA 149	RNA Gene	26	GC02P240456	1.48878	https://www.genecards.org/cgi-bin/carddisp.pl?gene=MIR149
AURKB	Aurora Kinase B	Protein Coding	58	GC17M011057	1.48815	https://www.genecards.org/cgi-bin/carddisp.pl?gene=AURKB
FADD	Fas Associated Via Death Domain	Protein Coding	52	GC11P070203	1.48815	https://www.genecards.org/cgi-bin/carddisp.pl?gene=FADD
GRB2	Growth Factor Receptor Bound Protein 2	Protein Coding	52	GC17M075318	1.48815	https://www.genecards.org/cgi-bin/carddisp.pl?gene=GRB2
NRP2	Neuropilin 2	Protein Coding	52	GC02P205681	1.48815	https://www.genecards.org/cgi-bin/carddisp.pl?gene=NRP2
ELK1	ETS Transcription Factor ELK1	Protein Coding	50	GC0XM047635	1.48815	https://www.genecards.org/cgi-bin/carddisp.pl?gene=ELK1
S100A8	S100 Calcium Binding Protein A8	Protein Coding	48	GC01M153391	1.48815	https://www.genecards.org/cgi-bin/carddisp.pl?gene=S100A8
GALNT1	Polypeptide N-Acetylgalactosaminyltransferase 1	Protein Coding	46	GC18P035581	1.48815	https://www.genecards.org/cgi-bin/carddisp.pl?gene=GALNT1
P3H4	Prolyl 3-Hydroxylase Family Member 4 (Inactive)	Protein Coding	42	GC17M041801	1.48815	https://www.genecards.org/cgi-bin/carddisp.pl?gene=P3H4
MIR381	MicroRNA 381	RNA Gene	20	GC14P110916	1.48815	https://www.genecards.org/cgi-bin/carddisp.pl?gene=MIR381
APOA1	Apolipoprotein A1	Protein Coding	57	GC11M116835	1.48432	https://www.genecards.org/cgi-bin/carddisp.pl?gene=APOA1
IFNAR2	Interferon Alpha And Beta Receptor Subunit 2	Protein Coding	56	GC21P033229	1.48229	https://www.genecards.org/cgi-bin/carddisp.pl?gene=IFNAR2
BCL6	BCL6 Transcription Repressor	Protein Coding	52	GC03M187721	1.48229	https://www.genecards.org/cgi-bin/carddisp.pl?gene=BCL6
CDC25B	Cell Division Cycle 25B	Protein Coding	52	GC20P004512	1.48229	https://www.genecards.org/cgi-bin/carddisp.pl?gene=CDC25B
SPARC	Secreted Protein Acidic And Cysteine Rich	Protein Coding	56	GC05M151661	1.46719	https://www.genecards.org/cgi-bin/carddisp.pl?gene=SPARC
BMP4	Bone Morphogenetic Protein 4	Protein Coding	55	GC14M053949	1.46719	https://www.genecards.org/cgi-bin/carddisp.pl?gene=BMP4
MCM5	Minichromosome Maintenance Complex Component 5	Protein Coding	52	GC22P035400	1.46719	https://www.genecards.org/cgi-bin/carddisp.pl?gene=MCM5
UGT1A10	UDP Glucuronosyltransferase Family 1 Member A10	Protein Coding	48	GC02P233636	1.46719	https://www.genecards.org/cgi-bin/carddisp.pl?gene=UGT1A10
VTCN1	V-Set Domain Containing T Cell Activation Inhibitor 1	Protein Coding	48	GC01M117143	1.46719	https://www.genecards.org/cgi-bin/carddisp.pl?gene=VTCN1
UGT1A8	UDP Glucuronosyltransferase Family 1 Member A8	Protein Coding	43	GC02P233618	1.46719	https://www.genecards.org/cgi-bin/carddisp.pl?gene=UGT1A8
CBX6	Chromobox 6	Protein Coding	42	GC22M038861	1.46719	https://www.genecards.org/cgi-bin/carddisp.pl?gene=CBX6
MED19	Mediator Complex Subunit 19	Protein Coding	39	GC11M057703	1.46719	https://www.genecards.org/cgi-bin/carddisp.pl?gene=MED19
CDR1-AS	CDR1 Antisense RNA	RNA Gene	7	GC0XU902169	1.46674	https://www.genecards.org/cgi-bin/carddisp.pl?gene=CDR1-AS
GGH	Gamma-Glutamyl Hydrolase	Protein Coding	50	GC08M063014	1.46308	https://www.genecards.org/cgi-bin/carddisp.pl?gene=GGH
MT3	Metallothionein 3	Protein Coding	44	GC16P056589	1.45468	https://www.genecards.org/cgi-bin/carddisp.pl?gene=MT3
HSPA8	Heat Shock Protein Family A (Hsp70) Member 8	Protein Coding	56	GC11M123057	1.44514	https://www.genecards.org/cgi-bin/carddisp.pl?gene=HSPA8
SIRT1	Sirtuin 1	Protein Coding	56	GC10P067884	1.44514	https://www.genecards.org/cgi-bin/carddisp.pl?gene=SIRT1
RUNX2	RUNX Family Transcription Factor 2	Protein Coding	53	GC06P092371	1.44514	https://www.genecards.org/cgi-bin/carddisp.pl?gene=RUNX2
ETS2	ETS Proto-Oncogene 2, Transcription Factor	Protein Coding	48	GC21P038805	1.44514	https://www.genecards.org/cgi-bin/carddisp.pl?gene=ETS2
RHOBTB2	Rho Related BTB Domain Containing 2	Protein Coding	47	GC08P022964	1.44514	https://www.genecards.org/cgi-bin/carddisp.pl?gene=RHOBTB2
TRIM29	Tripartite Motif Containing 29	Protein Coding	46	GC11M120111	1.44514	https://www.genecards.org/cgi-bin/carddisp.pl?gene=TRIM29
MIR135A2	MicroRNA 135a-2	RNA Gene	19	GC12P097563	1.44514	https://www.genecards.org/cgi-bin/carddisp.pl?gene=MIR135A2
HAGH	Hydroxyacylglutathione Hydrolase	Protein Coding	48	GC16M001795	1.44385	https://www.genecards.org/cgi-bin/carddisp.pl?gene=HAGH
CYP17A1	Cytochrome P450 Family 17 Subfamily A Member 1	Protein Coding	55	GC10M102830	1.44305	https://www.genecards.org/cgi-bin/carddisp.pl?gene=CYP17A1
ENG	Endoglin	Protein Coding	55	GC09M127815	1.44305	https://www.genecards.org/cgi-bin/carddisp.pl?gene=ENG
P2RX7	Purinergic Receptor P2X 7	Protein Coding	54	GC12P126979	1.44305	https://www.genecards.org/cgi-bin/carddisp.pl?gene=P2RX7
CYP24A1	Cytochrome P450 Family 24 Subfamily A Member 1	Protein Coding	53	GC20M054153	1.44305	https://www.genecards.org/cgi-bin/carddisp.pl?gene=CYP24A1
FZD7	Frizzled Class Receptor 7	Protein Coding	52	GC02P202041	1.44305	https://www.genecards.org/cgi-bin/carddisp.pl?gene=FZD7
HADHA	Hydroxyacyl-CoA Dehydrogenase Trifunctional Multienzyme Complex Subunit Alpha	Protein Coding	52	GC02M026190	1.44305	https://www.genecards.org/cgi-bin/carddisp.pl?gene=HADHA
MSR1	Macrophage Scavenger Receptor 1	Protein Coding	52	GC08M016107	1.44305	https://www.genecards.org/cgi-bin/carddisp.pl?gene=MSR1
SLC2A4	Solute Carrier Family 2 Member 4	Protein Coding	52	GC17P011713	1.44305	https://www.genecards.org/cgi-bin/carddisp.pl?gene=SLC2A4
ABCA5	ATP Binding Cassette Subfamily A Member 5	Protein Coding	50	GC17M069244	1.44305	https://www.genecards.org/cgi-bin/carddisp.pl?gene=ABCA5
APOA4	Apolipoprotein A4	Protein Coding	48	GC11M116820	1.44305	https://www.genecards.org/cgi-bin/carddisp.pl?gene=APOA4
RB1CC1	RB1 Inducible Coiled-Coil 1	Protein Coding	48	GC08M052622	1.44305	https://www.genecards.org/cgi-bin/carddisp.pl?gene=RB1CC1
TERF2	Telomeric Repeat Binding Factor 2	Protein Coding	48	GC16M069355	1.44305	https://www.genecards.org/cgi-bin/carddisp.pl?gene=TERF2
ALDH1L1	Aldehyde Dehydrogenase 1 Family Member L1	Protein Coding	47	GC03M126103	1.44305	https://www.genecards.org/cgi-bin/carddisp.pl?gene=ALDH1L1
MIR7-2	MicroRNA 7-2	RNA Gene	19	GC15P088611	1.4393	https://www.genecards.org/cgi-bin/carddisp.pl?gene=MIR7-2
POSTN	Periostin	Protein Coding	50	GC13M037562	1.42528	https://www.genecards.org/cgi-bin/carddisp.pl?gene=POSTN
KDM4A	Lysine Demethylase 4A	Protein Coding	51	GC01P043650	1.42351	https://www.genecards.org/cgi-bin/carddisp.pl?gene=KDM4A
HNF4G	Hepatocyte Nuclear Factor 4 Gamma	Protein Coding	49	GC08P075407	1.42351	https://www.genecards.org/cgi-bin/carddisp.pl?gene=HNF4G
LINC02883	Long Intergenic Non-Protein Coding RNA 2883	RNA Gene	14	GC15M123450	1.42351	https://www.genecards.org/cgi-bin/carddisp.pl?gene=LINC02883
RET	Ret Proto-Oncogene	Protein Coding	61	GC10P043237	1.42209	https://www.genecards.org/cgi-bin/carddisp.pl?gene=RET
CDK5	Cyclin Dependent Kinase 5	Protein Coding	60	GC07M151053	1.42209	https://www.genecards.org/cgi-bin/carddisp.pl?gene=CDK5
BCR	BCR Activator Of RhoGEF And GTPase	Protein Coding	59	GC22P023179	1.42209	https://www.genecards.org/cgi-bin/carddisp.pl?gene=BCR
CSF1R	Colony Stimulating Factor 1 Receptor	Protein Coding	59	GC05M150053	1.42209	https://www.genecards.org/cgi-bin/carddisp.pl?gene=CSF1R
JAK3	Janus Kinase 3	Protein Coding	58	GC19M017824	1.42209	https://www.genecards.org/cgi-bin/carddisp.pl?gene=JAK3
LDLR	Low Density Lipoprotein Receptor	Protein Coding	58	GC19P011091	1.42209	https://www.genecards.org/cgi-bin/carddisp.pl?gene=LDLR
CASR	Calcium Sensing Receptor	Protein Coding	57	GC03P122183	1.42209	https://www.genecards.org/cgi-bin/carddisp.pl?gene=CASR
IFNGR1	Interferon Gamma Receptor 1	Protein Coding	57	GC06M137197	1.42209	https://www.genecards.org/cgi-bin/carddisp.pl?gene=IFNGR1
SLC6A3	Solute Carrier Family 6 Member 3	Protein Coding	57	GC05M001392	1.42209	https://www.genecards.org/cgi-bin/carddisp.pl?gene=SLC6A3
TNFRSF1A	TNF Receptor Superfamily Member 1A	Protein Coding	57	GC12M006328	1.42209	https://www.genecards.org/cgi-bin/carddisp.pl?gene=TNFRSF1A
CYBB	Cytochrome B-245 Beta Chain	Protein Coding	56	GC0XP037780	1.42209	https://www.genecards.org/cgi-bin/carddisp.pl?gene=CYBB
ENPP1	Ectonucleotide Pyrophosphatase/Phosphodiesterase 1	Protein Coding	56	GC06P131808	1.42209	https://www.genecards.org/cgi-bin/carddisp.pl?gene=ENPP1
LPL	Lipoprotein Lipase	Protein Coding	56	GC08P019901	1.42209	https://www.genecards.org/cgi-bin/carddisp.pl?gene=LPL
LRP5	LDL Receptor Related Protein 5	Protein Coding	56	GC11P068298	1.42209	https://www.genecards.org/cgi-bin/carddisp.pl?gene=LRP5
PGR	Progesterone Receptor	Protein Coding	56	GC11M102130	1.42209	https://www.genecards.org/cgi-bin/carddisp.pl?gene=PGR
ABCA1	ATP Binding Cassette Subfamily A Member 1	Protein Coding	55	GC09M104781	1.42209	https://www.genecards.org/cgi-bin/carddisp.pl?gene=ABCA1
CALCR	Calcitonin Receptor	Protein Coding	55	GC07M093424	1.42209	https://www.genecards.org/cgi-bin/carddisp.pl?gene=CALCR
LRP6	LDL Receptor Related Protein 6	Protein Coding	55	GC12M022658	1.42209	https://www.genecards.org/cgi-bin/carddisp.pl?gene=LRP6
MAOA	Monoamine Oxidase A	Protein Coding	55	GC0XP043654	1.42209	https://www.genecards.org/cgi-bin/carddisp.pl?gene=MAOA
MASP1	MBL Associated Serine Protease 1	Protein Coding	55	GC03M187216	1.42209	https://www.genecards.org/cgi-bin/carddisp.pl?gene=MASP1
SCARB1	Scavenger Receptor Class B Member 1	Protein Coding	55	GC12M124776	1.42209	https://www.genecards.org/cgi-bin/carddisp.pl?gene=SCARB1
TYR	Tyrosinase	Protein Coding	55	GC11P089177	1.42209	https://www.genecards.org/cgi-bin/carddisp.pl?gene=TYR
CDC25A	Cell Division Cycle 25A	Protein Coding	54	GC03M048195	1.42209	https://www.genecards.org/cgi-bin/carddisp.pl?gene=CDC25A
LCAT	Lecithin-Cholesterol Acyltransferase	Protein Coding	54	GC16M067939	1.42209	https://www.genecards.org/cgi-bin/carddisp.pl?gene=LCAT
NCF2	Neutrophil Cytosolic Factor 2	Protein Coding	54	GC01M184057	1.42209	https://www.genecards.org/cgi-bin/carddisp.pl?gene=NCF2
PLA2G6	Phospholipase A2 Group VI	Protein Coding	54	GC22M063106	1.42209	https://www.genecards.org/cgi-bin/carddisp.pl?gene=PLA2G6
ABCB11	ATP Binding Cassette Subfamily B Member 11	Protein Coding	53	GC02M168922	1.42209	https://www.genecards.org/cgi-bin/carddisp.pl?gene=ABCB11
AKR1C4	Aldo-Keto Reductase Family 1 Member C4	Protein Coding	53	GC10P005195	1.42209	https://www.genecards.org/cgi-bin/carddisp.pl?gene=AKR1C4
BARD1	BRCA1 Associated RING Domain 1	Protein Coding	53	GC02M214725	1.42209	https://www.genecards.org/cgi-bin/carddisp.pl?gene=BARD1
CD81	CD81 Molecule	Protein Coding	53	GC11P002563	1.42209	https://www.genecards.org/cgi-bin/carddisp.pl?gene=CD81
CETP	Cholesteryl Ester Transfer Protein	Protein Coding	53	GC16P056961	1.42209	https://www.genecards.org/cgi-bin/carddisp.pl?gene=CETP
CTSH	Cathepsin H	Protein Coding	53	GC15M122427	1.42209	https://www.genecards.org/cgi-bin/carddisp.pl?gene=CTSH
GHR	Growth Hormone Receptor	Protein Coding	53	GC05P042429	1.42209	https://www.genecards.org/cgi-bin/carddisp.pl?gene=GHR
HMGCR	3-Hydroxy-3-Methylglutaryl-CoA Reductase	Protein Coding	53	GC05P075336	1.42209	https://www.genecards.org/cgi-bin/carddisp.pl?gene=HMGCR
HSD17B4	Hydroxysteroid 17-Beta Dehydrogenase 4	Protein Coding	53	GC05P119452	1.42209	https://www.genecards.org/cgi-bin/carddisp.pl?gene=HSD17B4
HTR1D	5-Hydroxytryptamine Receptor 1D	Protein Coding	53	GC01M023191	1.42209	https://www.genecards.org/cgi-bin/carddisp.pl?gene=HTR1D
IL10RA	Interleukin 10 Receptor Subunit Alpha	Protein Coding	53	GC11P117987	1.42209	https://www.genecards.org/cgi-bin/carddisp.pl?gene=IL10RA
LIG4	DNA Ligase 4	Protein Coding	53	GC13M108207	1.42209	https://www.genecards.org/cgi-bin/carddisp.pl?gene=LIG4
MBL2	Mannose Binding Lectin 2	Protein Coding	53	GC10M052760	1.42209	https://www.genecards.org/cgi-bin/carddisp.pl?gene=MBL2
PIN1	Peptidylprolyl Cis/Trans Isomerase, NIMA-Interacting 1	Protein Coding	53	GC19P009835	1.42209	https://www.genecards.org/cgi-bin/carddisp.pl?gene=PIN1
ROS1	ROS Proto-Oncogene 1, Receptor Tyrosine Kinase	Protein Coding	53	GC06M117287	1.42209	https://www.genecards.org/cgi-bin/carddisp.pl?gene=ROS1
WRN	WRN RecQ Like Helicase	Protein Coding	53	GC08P031033	1.42209	https://www.genecards.org/cgi-bin/carddisp.pl?gene=WRN
ABCC4	ATP Binding Cassette Subfamily C Member 4	Protein Coding	52	GC13M095019	1.42209	https://www.genecards.org/cgi-bin/carddisp.pl?gene=ABCC4
ALOX15	Arachidonate 15-Lipoxygenase	Protein Coding	52	GC17M004630	1.42209	https://www.genecards.org/cgi-bin/carddisp.pl?gene=ALOX15
CCR3	C-C Motif Chemokine Receptor 3	Protein Coding	52	GC03P047610	1.42209	https://www.genecards.org/cgi-bin/carddisp.pl?gene=CCR3
CDK7	Cyclin Dependent Kinase 7	Protein Coding	52	GC05P069419	1.42209	https://www.genecards.org/cgi-bin/carddisp.pl?gene=CDK7
COASY	Coenzyme A Synthase	Protein Coding	52	GC17P042561	1.42209	https://www.genecards.org/cgi-bin/carddisp.pl?gene=COASY
CYP7B1	Cytochrome P450 Family 7 Subfamily B Member 1	Protein Coding	52	GC08M064587	1.42209	https://www.genecards.org/cgi-bin/carddisp.pl?gene=CYP7B1
DRD4	Dopamine Receptor D4	Protein Coding	52	GC11P002096	1.42209	https://www.genecards.org/cgi-bin/carddisp.pl?gene=DRD4
HFE	Homeostatic Iron Regulator	Protein Coding	52	GC06P026087	1.42209	https://www.genecards.org/cgi-bin/carddisp.pl?gene=HFE
HSPB8	Heat Shock Protein Family B (Small) Member 8	Protein Coding	52	GC12P119173	1.42209	https://www.genecards.org/cgi-bin/carddisp.pl?gene=HSPB8
IL3	Interleukin 3	Protein Coding	52	GC05P132060	1.42209	https://www.genecards.org/cgi-bin/carddisp.pl?gene=IL3
IL7R	Interleukin 7 Receptor	Protein Coding	52	GC05P035852	1.42209	https://www.genecards.org/cgi-bin/carddisp.pl?gene=IL7R
LIPC	Lipase C, Hepatic Type	Protein Coding	52	GC15P058410	1.42209	https://www.genecards.org/cgi-bin/carddisp.pl?gene=LIPC
PTH	Parathyroid Hormone	Protein Coding	52	GC11M013492	1.42209	https://www.genecards.org/cgi-bin/carddisp.pl?gene=PTH
RXRB	Retinoid X Receptor Beta	Protein Coding	52	GC06M033193	1.42209	https://www.genecards.org/cgi-bin/carddisp.pl?gene=RXRB
SSTR3	Somatostatin Receptor 3	Protein Coding	52	GC22M037204	1.42209	https://www.genecards.org/cgi-bin/carddisp.pl?gene=SSTR3
TGM1	Transglutaminase 1	Protein Coding	52	GC14M024249	1.42209	https://www.genecards.org/cgi-bin/carddisp.pl?gene=TGM1
ABCA7	ATP Binding Cassette Subfamily A Member 7	Protein Coding	51	GC19P003675	1.42209	https://www.genecards.org/cgi-bin/carddisp.pl?gene=ABCA7
AKR1A1	Aldo-Keto Reductase Family 1 Member A1	Protein Coding	51	GC01P045550	1.42209	https://www.genecards.org/cgi-bin/carddisp.pl?gene=AKR1A1
CBR1	Carbonyl Reductase 1	Protein Coding	51	GC21P036069	1.42209	https://www.genecards.org/cgi-bin/carddisp.pl?gene=CBR1
CD86	CD86 Molecule	Protein Coding	51	GC03P122055	1.42209	https://www.genecards.org/cgi-bin/carddisp.pl?gene=CD86
CGA	Glycoprotein Hormones, Alpha Polypeptide	Protein Coding	51	GC06M087085	1.42209	https://www.genecards.org/cgi-bin/carddisp.pl?gene=CGA
DRD1	Dopamine Receptor D1	Protein Coding	51	GC05M175440	1.42209	https://www.genecards.org/cgi-bin/carddisp.pl?gene=DRD1
IFNGR2	Interferon Gamma Receptor 2	Protein Coding	51	GC21P033402	1.42209	https://www.genecards.org/cgi-bin/carddisp.pl?gene=IFNGR2
IRF3	Interferon Regulatory Factor 3	Protein Coding	51	GC19M049659	1.42209	https://www.genecards.org/cgi-bin/carddisp.pl?gene=IRF3
MYO5A	Myosin VA	Protein Coding	51	GC15M123722	1.42209	https://www.genecards.org/cgi-bin/carddisp.pl?gene=MYO5A
PAK6	P21 (RAC1) Activated Kinase 6	Protein Coding	51	GC15P040217	1.42209	https://www.genecards.org/cgi-bin/carddisp.pl?gene=PAK6
SFTPD	Surfactant Protein D	Protein Coding	51	GC10M079937	1.42209	https://www.genecards.org/cgi-bin/carddisp.pl?gene=SFTPD
TSPO	Translocator Protein	Protein Coding	51	GC22P043151	1.42209	https://www.genecards.org/cgi-bin/carddisp.pl?gene=TSPO
TXNRD2	Thioredoxin Reductase 2	Protein Coding	51	GC22M019863	1.42209	https://www.genecards.org/cgi-bin/carddisp.pl?gene=TXNRD2
ABCG8	ATP Binding Cassette Subfamily G Member 8	Protein Coding	50	GC02P043828	1.42209	https://www.genecards.org/cgi-bin/carddisp.pl?gene=ABCG8
AIMP2	Aminoacyl TRNA Synthetase Complex Interacting Multifunctional Protein 2	Protein Coding	50	GC07P006016	1.42209	https://www.genecards.org/cgi-bin/carddisp.pl?gene=AIMP2
CX3CR1	C-X3-C Motif Chemokine Receptor 1	Protein Coding	50	GC03M039279	1.42209	https://www.genecards.org/cgi-bin/carddisp.pl?gene=CX3CR1
CXCR1	C-X-C Motif Chemokine Receptor 1	Protein Coding	50	GC02M218162	1.42209	https://www.genecards.org/cgi-bin/carddisp.pl?gene=CXCR1
GRPR	Gastrin Releasing Peptide Receptor	Protein Coding	50	GC0XP016141	1.42209	https://www.genecards.org/cgi-bin/carddisp.pl?gene=GRPR
HIF1AN	Hypoxia Inducible Factor 1 Subunit Alpha Inhibitor	Protein Coding	50	GC10P100529	1.42209	https://www.genecards.org/cgi-bin/carddisp.pl?gene=HIF1AN
HSD17B2	Hydroxysteroid 17-Beta Dehydrogenase 2	Protein Coding	50	GC16P082068	1.42209	https://www.genecards.org/cgi-bin/carddisp.pl?gene=HSD17B2
HTR1B	5-Hydroxytryptamine Receptor 1B	Protein Coding	50	GC06M077488	1.42209	https://www.genecards.org/cgi-bin/carddisp.pl?gene=HTR1B
IGFBP1	Insulin Like Growth Factor Binding Protein 1	Protein Coding	50	GC07P048184	1.42209	https://www.genecards.org/cgi-bin/carddisp.pl?gene=IGFBP1
IGFBP6	Insulin Like Growth Factor Binding Protein 6	Protein Coding	50	GC12P053097	1.42209	https://www.genecards.org/cgi-bin/carddisp.pl?gene=IGFBP6
LITAF	Lipopolysaccharide Induced TNF Factor	Protein Coding	50	GC16M011547	1.42209	https://www.genecards.org/cgi-bin/carddisp.pl?gene=LITAF
MBD4	Methyl-CpG Binding Domain 4, DNA Glycosylase	Protein Coding	50	GC03M129430	1.42209	https://www.genecards.org/cgi-bin/carddisp.pl?gene=MBD4
OCA2	OCA2 Melanosomal Transmembrane Protein	Protein Coding	50	GC15M027754	1.42209	https://www.genecards.org/cgi-bin/carddisp.pl?gene=OCA2
OPRD1	Opioid Receptor Delta 1	Protein Coding	50	GC01P028812	1.42209	https://www.genecards.org/cgi-bin/carddisp.pl?gene=OPRD1
SELE	Selectin E	Protein Coding	50	GC01M169722	1.42209	https://www.genecards.org/cgi-bin/carddisp.pl?gene=SELE
SLC4A2	Solute Carrier Family 4 Member 2	Protein Coding	50	GC07P151057	1.42209	https://www.genecards.org/cgi-bin/carddisp.pl?gene=SLC4A2
SOAT2	Sterol O-Acyltransferase 2	Protein Coding	50	GC12P053103	1.42209	https://www.genecards.org/cgi-bin/carddisp.pl?gene=SOAT2
SOD3	Superoxide Dismutase 3	Protein Coding	50	GC04P024798	1.42209	https://www.genecards.org/cgi-bin/carddisp.pl?gene=SOD3
ATP1B2	ATPase Na+/K+ Transporting Subunit Beta 2	Protein Coding	49	GC17P011744	1.42209	https://www.genecards.org/cgi-bin/carddisp.pl?gene=ATP1B2
EXO1	Exonuclease 1	Protein Coding	49	GC01P241847	1.42209	https://www.genecards.org/cgi-bin/carddisp.pl?gene=EXO1
HSD3B1	Hydroxy-Delta-5-Steroid Dehydrogenase, 3 Beta- And Steroid Delta-Isomerase 1	Protein Coding	49	GC01P119507	1.42209	https://www.genecards.org/cgi-bin/carddisp.pl?gene=HSD3B1
IGFBP5	Insulin Like Growth Factor Binding Protein 5	Protein Coding	49	GC02M216672	1.42209	https://www.genecards.org/cgi-bin/carddisp.pl?gene=IGFBP5
SLAMF1	Signaling Lymphocytic Activation Molecule Family Member 1	Protein Coding	49	GC01M160608	1.42209	https://www.genecards.org/cgi-bin/carddisp.pl?gene=SLAMF1
TSG101	Tumor Susceptibility 101	Protein Coding	49	GC11M018468	1.42209	https://www.genecards.org/cgi-bin/carddisp.pl?gene=TSG101
UCP3	Uncoupling Protein 3	Protein Coding	49	GC11M074000	1.42209	https://www.genecards.org/cgi-bin/carddisp.pl?gene=UCP3
BHMT	Betaine--Homocysteine S-Methyltransferase	Protein Coding	48	GC05P079111	1.42209	https://www.genecards.org/cgi-bin/carddisp.pl?gene=BHMT
BPI	Bactericidal Permeability Increasing Protein	Protein Coding	48	GC20P038304	1.42209	https://www.genecards.org/cgi-bin/carddisp.pl?gene=BPI
EFNB3	Ephrin B3	Protein Coding	48	GC17P011746	1.42209	https://www.genecards.org/cgi-bin/carddisp.pl?gene=EFNB3
FOXC1	Forkhead Box C1	Protein Coding	48	GC06P001610	1.42209	https://www.genecards.org/cgi-bin/carddisp.pl?gene=FOXC1
HSD17B1	Hydroxysteroid 17-Beta Dehydrogenase 1	Protein Coding	48	GC17P061989	1.42209	https://www.genecards.org/cgi-bin/carddisp.pl?gene=HSD17B1
MATR3	Matrin 3	Protein Coding	48	GC05P139274	1.42209	https://www.genecards.org/cgi-bin/carddisp.pl?gene=MATR3
METTL1	Methyltransferase 1, TRNA Methylguanosine	Protein Coding	48	GC12M057768	1.42209	https://www.genecards.org/cgi-bin/carddisp.pl?gene=METTL1
MPDU1	Mannose-P-Dolichol Utilization Defect 1	Protein Coding	48	GC17P007583	1.42209	https://www.genecards.org/cgi-bin/carddisp.pl?gene=MPDU1
POT1	Protection Of Telomeres 1	Protein Coding	48	GC07M124822	1.42209	https://www.genecards.org/cgi-bin/carddisp.pl?gene=POT1
SHBG	Sex Hormone Binding Globulin	Protein Coding	48	GC17P007613	1.42209	https://www.genecards.org/cgi-bin/carddisp.pl?gene=SHBG
SLC23A2	Solute Carrier Family 23 Member 2	Protein Coding	48	GC20M004852	1.42209	https://www.genecards.org/cgi-bin/carddisp.pl?gene=SLC23A2
CYP3A7	Cytochrome P450 Family 3 Subfamily A Member 7	Protein Coding	47	GC07M099705	1.42209	https://www.genecards.org/cgi-bin/carddisp.pl?gene=CYP3A7
DIO1	Iodothyronine Deiodinase 1	Protein Coding	47	GC01P053891	1.42209	https://www.genecards.org/cgi-bin/carddisp.pl?gene=DIO1
GPX3	Glutathione Peroxidase 3	Protein Coding	47	GC05P150997	1.42209	https://www.genecards.org/cgi-bin/carddisp.pl?gene=GPX3
GSTA4	Glutathione S-Transferase Alpha 4	Protein Coding	47	GC06M052977	1.42209	https://www.genecards.org/cgi-bin/carddisp.pl?gene=GSTA4
HUS1	HUS1 Checkpoint Clamp Component	Protein Coding	47	GC07M048046	1.42209	https://www.genecards.org/cgi-bin/carddisp.pl?gene=HUS1
IL15RA	Interleukin 15 Receptor Subunit Alpha	Protein Coding	47	GC10M005943	1.42209	https://www.genecards.org/cgi-bin/carddisp.pl?gene=IL15RA
LMO2	LIM Domain Only 2	Protein Coding	47	GC11M033858	1.42209	https://www.genecards.org/cgi-bin/carddisp.pl?gene=LMO2
LMOD1	Leiomodin 1	Protein Coding	47	GC01M201896	1.42209	https://www.genecards.org/cgi-bin/carddisp.pl?gene=LMOD1
MBD2	Methyl-CpG Binding Domain Protein 2	Protein Coding	47	GC18M054151	1.42209	https://www.genecards.org/cgi-bin/carddisp.pl?gene=MBD2
MEST	Mesoderm Specific Transcript	Protein Coding	47	GC07P130486	1.42209	https://www.genecards.org/cgi-bin/carddisp.pl?gene=MEST
MX1	MX Dynamin Like GTPase 1	Protein Coding	47	GC21P041420	1.42209	https://www.genecards.org/cgi-bin/carddisp.pl?gene=MX1
RGS5	Regulator Of G Protein Signaling 5	Protein Coding	47	GC01M163111	1.42209	https://www.genecards.org/cgi-bin/carddisp.pl?gene=RGS5
SCUBE2	Signal Peptide, CUB Domain And EGF Like Domain Containing 2	Protein Coding	47	GC11M009019	1.42209	https://www.genecards.org/cgi-bin/carddisp.pl?gene=SCUBE2
SLC23A1	Solute Carrier Family 23 Member 1	Protein Coding	47	GC05M139377	1.42209	https://www.genecards.org/cgi-bin/carddisp.pl?gene=SLC23A1
WRAP53	WD Repeat Containing Antisense To TP53	Protein Coding	47	GC17P011745	1.42209	https://www.genecards.org/cgi-bin/carddisp.pl?gene=WRAP53
NUBP2	NUBP Iron-Sulfur Cluster Assembly Factor 2, Cytosolic	Protein Coding	46	GC16P001782	1.42209	https://www.genecards.org/cgi-bin/carddisp.pl?gene=NUBP2
SEC14L2	SEC14 Like Lipid Binding 2	Protein Coding	46	GC22P030396	1.42209	https://www.genecards.org/cgi-bin/carddisp.pl?gene=SEC14L2
SLC30A1	Solute Carrier Family 30 Member 1	Protein Coding	46	GC01M211571	1.42209	https://www.genecards.org/cgi-bin/carddisp.pl?gene=SLC30A1
SLC6A18	Solute Carrier Family 6 Member 18	Protein Coding	46	GC05P001225	1.42209	https://www.genecards.org/cgi-bin/carddisp.pl?gene=SLC6A18
TNIP1	TNFAIP3 Interacting Protein 1	Protein Coding	46	GC05M151029	1.42209	https://www.genecards.org/cgi-bin/carddisp.pl?gene=TNIP1
ABCA6	ATP Binding Cassette Subfamily A Member 6	Protein Coding	45	GC17M069062	1.42209	https://www.genecards.org/cgi-bin/carddisp.pl?gene=ABCA6
B9D2	B9 Domain Containing 2	Protein Coding	45	GC19M041354	1.42209	https://www.genecards.org/cgi-bin/carddisp.pl?gene=B9D2
CSTF1	Cleavage Stimulation Factor Subunit 1	Protein Coding	45	GC20P056392	1.42209	https://www.genecards.org/cgi-bin/carddisp.pl?gene=CSTF1
NFKBIE	NFKB Inhibitor Epsilon	Protein Coding	45	GC06M044258	1.42209	https://www.genecards.org/cgi-bin/carddisp.pl?gene=NFKBIE
PCTP	Phosphatidylcholine Transfer Protein	Protein Coding	45	GC17P063013	1.42209	https://www.genecards.org/cgi-bin/carddisp.pl?gene=PCTP
RGS17	Regulator Of G Protein Signaling 17	Protein Coding	45	GC06M153004	1.42209	https://www.genecards.org/cgi-bin/carddisp.pl?gene=RGS17
ANKK1	Ankyrin Repeat And Kinase Domain Containing 1	Protein Coding	44	GC11P113387	1.42209	https://www.genecards.org/cgi-bin/carddisp.pl?gene=ANKK1
ARVCF	ARVCF Delta Catenin Family Member	Protein Coding	44	GC22M019966	1.42209	https://www.genecards.org/cgi-bin/carddisp.pl?gene=ARVCF
RERG	RAS Like Estrogen Regulated Growth Inhibitor	Protein Coding	44	GC12M022703	1.42209	https://www.genecards.org/cgi-bin/carddisp.pl?gene=RERG
SLC30A4	Solute Carrier Family 30 Member 4	Protein Coding	44	GC15M045479	1.42209	https://www.genecards.org/cgi-bin/carddisp.pl?gene=SLC30A4
SRA1	Steroid Receptor RNA Activator 1	Protein Coding	44	GC05M140537	1.42209	https://www.genecards.org/cgi-bin/carddisp.pl?gene=SRA1
HAO2	Hydroxyacid Oxidase 2	Protein Coding	43	GC01P119368	1.42209	https://www.genecards.org/cgi-bin/carddisp.pl?gene=HAO2
IL9R	Interleukin 9 Receptor	Protein Coding	43	GC0XP155997	1.42209	https://www.genecards.org/cgi-bin/carddisp.pl?gene=IL9R
KRT23	Keratin 23	Protein Coding	43	GC17M040922	1.42209	https://www.genecards.org/cgi-bin/carddisp.pl?gene=KRT23
RAB15	RAB15, Member RAS Oncogene Family	Protein Coding	43	GC14M064945	1.42209	https://www.genecards.org/cgi-bin/carddisp.pl?gene=RAB15
SAT2	Spermidine/Spermine N1-Acetyltransferase Family Member 2	Protein Coding	43	GC17M007626	1.42209	https://www.genecards.org/cgi-bin/carddisp.pl?gene=SAT2
SELENOP	Selenoprotein P	Protein Coding	43	GC05M042800	1.42209	https://www.genecards.org/cgi-bin/carddisp.pl?gene=SELENOP
SEPTIN2	Septin 2	Protein Coding	43	GC02P241316	1.42209	https://www.genecards.org/cgi-bin/carddisp.pl?gene=SEPTIN2
ZFPM1	Zinc Finger Protein, FOG Family Member 1	Protein Coding	43	GC16P088451	1.42209	https://www.genecards.org/cgi-bin/carddisp.pl?gene=ZFPM1
NPAT	Nuclear Protein, Coactivator Of Histone Transcription	Protein Coding	42	GC11M108157	1.42209	https://www.genecards.org/cgi-bin/carddisp.pl?gene=NPAT
POLR1G	RNA Polymerase I Subunit G	Protein Coding	42	GC19P073068	1.42209	https://www.genecards.org/cgi-bin/carddisp.pl?gene=POLR1G
RMDN2	Regulator Of Microtubule Dynamics 2	Protein Coding	41	GC02P037923	1.42209	https://www.genecards.org/cgi-bin/carddisp.pl?gene=RMDN2
FLACC1	Flagellum Associated Containing Coiled-Coil Domains 1	Protein Coding	40	GC02M201458	1.42209	https://www.genecards.org/cgi-bin/carddisp.pl?gene=FLACC1
CCDC97	Coiled-Coil Domain Containing 97	Protein Coding	39	GC19P041310	1.42209	https://www.genecards.org/cgi-bin/carddisp.pl?gene=CCDC97
DNAJC18	DnaJ Heat Shock Protein Family (Hsp40) Member C18	Protein Coding	39	GC05M139408	1.42209	https://www.genecards.org/cgi-bin/carddisp.pl?gene=DNAJC18
NICN1	Nicolin 1, Tubulin Polyglutamylase Complex Subunit	Protein Coding	39	GC03M049422	1.42209	https://www.genecards.org/cgi-bin/carddisp.pl?gene=NICN1
RPA4	Replication Protein A4	Protein Coding	39	GC0XP096883	1.42209	https://www.genecards.org/cgi-bin/carddisp.pl?gene=RPA4
SELENOF	Selenoprotein F	Protein Coding	39	GC01M086863	1.42209	https://www.genecards.org/cgi-bin/carddisp.pl?gene=SELENOF
TCTA	T Cell Leukemia Translocation Altered	Protein Coding	39	GC03P049412	1.42209	https://www.genecards.org/cgi-bin/carddisp.pl?gene=TCTA
ZNF230	Zinc Finger Protein 230	Protein Coding	39	GC19P044002	1.42209	https://www.genecards.org/cgi-bin/carddisp.pl?gene=ZNF230
C11orf65	Chromosome 11 Open Reading Frame 65	Protein Coding	36	GC11M108308	1.42209	https://www.genecards.org/cgi-bin/carddisp.pl?gene=C11orf65
N4BP2L1	NEDD4 Binding Protein 2 Like 1	Protein Coding	36	GC13M037352	1.42209	https://www.genecards.org/cgi-bin/carddisp.pl?gene=N4BP2L1
IGF2-AS	IGF2 Antisense RNA	RNA Gene	31	GC11P002140	1.42209	https://www.genecards.org/cgi-bin/carddisp.pl?gene=IGF2-AS
MIR155HG	MIR155 Host Gene	RNA Gene	25	GC21P025597	1.42209	https://www.genecards.org/cgi-bin/carddisp.pl?gene=MIR155HG
DICER1	Dicer 1, Ribonuclease III	Protein Coding	56	GC14M095086	1.42184	https://www.genecards.org/cgi-bin/carddisp.pl?gene=DICER1
TBXAS1	Thromboxane A Synthase 1	Protein Coding	56	GC07P139777	1.42184	https://www.genecards.org/cgi-bin/carddisp.pl?gene=TBXAS1
CYCS	Cytochrome C, Somatic	Protein Coding	55	GC07M025118	1.42184	https://www.genecards.org/cgi-bin/carddisp.pl?gene=CYCS
GNRHR	Gonadotropin Releasing Hormone Receptor	Protein Coding	54	GC04M067737	1.42184	https://www.genecards.org/cgi-bin/carddisp.pl?gene=GNRHR
CDH13	Cadherin 13	Protein Coding	51	GC16P082626	1.42184	https://www.genecards.org/cgi-bin/carddisp.pl?gene=CDH13
POLI	DNA Polymerase Iota	Protein Coding	48	GC18P054274	1.42184	https://www.genecards.org/cgi-bin/carddisp.pl?gene=POLI
GNRH1	Gonadotropin Releasing Hormone 1	Protein Coding	47	GC08M025419	1.42184	https://www.genecards.org/cgi-bin/carddisp.pl?gene=GNRH1
TMEM129	Transmembrane Protein 129, E3 Ubiquitin Ligase	Protein Coding	36	GC04M001715	1.42184	https://www.genecards.org/cgi-bin/carddisp.pl?gene=TMEM129
ATP7A	ATPase Copper Transporting Alpha	Protein Coding	52	GC0XP078031	1.41167	https://www.genecards.org/cgi-bin/carddisp.pl?gene=ATP7A
PLAT	Plasminogen Activator, Tissue Type	Protein Coding	57	GC08M042174	1.40727	https://www.genecards.org/cgi-bin/carddisp.pl?gene=PLAT
KIF20A	Kinesin Family Member 20A	Protein Coding	47	GC05P138189	1.40727	https://www.genecards.org/cgi-bin/carddisp.pl?gene=KIF20A
MIR24-2	MicroRNA 24-2	RNA Gene	22	GC19M014655	1.40727	https://www.genecards.org/cgi-bin/carddisp.pl?gene=MIR24-2
HDAC2	Histone Deacetylase 2	Protein Coding	59	GC06M113933	1.39703	https://www.genecards.org/cgi-bin/carddisp.pl?gene=HDAC2
PHGDH	Phosphoglycerate Dehydrogenase	Protein Coding	57	GC01P119660	1.39703	https://www.genecards.org/cgi-bin/carddisp.pl?gene=PHGDH
TUBB3	Tubulin Beta 3 Class III	Protein Coding	55	GC16P091607	1.39703	https://www.genecards.org/cgi-bin/carddisp.pl?gene=TUBB3
FANCC	FA Complementation Group C	Protein Coding	54	GC09M095099	1.39703	https://www.genecards.org/cgi-bin/carddisp.pl?gene=FANCC
PFN1	Profilin 1	Protein Coding	53	GC17M004945	1.39703	https://www.genecards.org/cgi-bin/carddisp.pl?gene=PFN1
PRMT5	Protein Arginine Methyltransferase 5	Protein Coding	53	GC14M022920	1.39703	https://www.genecards.org/cgi-bin/carddisp.pl?gene=PRMT5
SPHK1	Sphingosine Kinase 1	Protein Coding	53	GC17P076376	1.39703	https://www.genecards.org/cgi-bin/carddisp.pl?gene=SPHK1
PAX5	Paired Box 5	Protein Coding	52	GC09M036879	1.39703	https://www.genecards.org/cgi-bin/carddisp.pl?gene=PAX5
FANCG	FA Complementation Group G	Protein Coding	50	GC09M035073	1.39703	https://www.genecards.org/cgi-bin/carddisp.pl?gene=FANCG
LCN2	Lipocalin 2	Protein Coding	52	GC09P128149	1.39196	https://www.genecards.org/cgi-bin/carddisp.pl?gene=LCN2
MIR124-1	MicroRNA 124-1	RNA Gene	22	GC08M009903	1.39196	https://www.genecards.org/cgi-bin/carddisp.pl?gene=MIR124-1
SPP1	Secreted Phosphoprotein 1	Protein Coding	53	GC04P087975	1.39055	https://www.genecards.org/cgi-bin/carddisp.pl?gene=SPP1
NTN1	Netrin 1	Protein Coding	52	GC17P011813	1.39055	https://www.genecards.org/cgi-bin/carddisp.pl?gene=NTN1
ATF3	Activating Transcription Factor 3	Protein Coding	51	GC01P212565	1.39055	https://www.genecards.org/cgi-bin/carddisp.pl?gene=ATF3
OGT	O-Linked N-Acetylglucosamine (GlcNAc) Transferase	Protein Coding	51	GC0XP071534	1.39055	https://www.genecards.org/cgi-bin/carddisp.pl?gene=OGT
PPP2R2A	Protein Phosphatase 2 Regulatory Subunit Balpha	Protein Coding	50	GC08P026292	1.39055	https://www.genecards.org/cgi-bin/carddisp.pl?gene=PPP2R2A
GSTM5	Glutathione S-Transferase Mu 5	Protein Coding	47	GC01P109711	1.39055	https://www.genecards.org/cgi-bin/carddisp.pl?gene=GSTM5
PIGU	Phosphatidylinositol Glycan Anchor Biosynthesis Class U	Protein Coding	44	GC20M034560	1.39055	https://www.genecards.org/cgi-bin/carddisp.pl?gene=PIGU
GPR137	G Protein-Coupled Receptor 137	Protein Coding	40	GC11P064270	1.39055	https://www.genecards.org/cgi-bin/carddisp.pl?gene=GPR137
MIR7-3	MicroRNA 7-3	RNA Gene	21	GC19P004770	1.39055	https://www.genecards.org/cgi-bin/carddisp.pl?gene=MIR7-3
ANXA1	Annexin A1	Protein Coding	54	GC09P073151	1.3733	https://www.genecards.org/cgi-bin/carddisp.pl?gene=ANXA1
GATA6	GATA Binding Protein 6	Protein Coding	53	GC18P022169	1.3733	https://www.genecards.org/cgi-bin/carddisp.pl?gene=GATA6
ADAM12	ADAM Metallopeptidase Domain 12	Protein Coding	52	GC10M126012	1.3733	https://www.genecards.org/cgi-bin/carddisp.pl?gene=ADAM12
TFPI2	Tissue Factor Pathway Inhibitor 2	Protein Coding	49	GC07M093885	1.3733	https://www.genecards.org/cgi-bin/carddisp.pl?gene=TFPI2
MIR20A	MicroRNA 20a	RNA Gene	22	GC13P091580	1.3733	https://www.genecards.org/cgi-bin/carddisp.pl?gene=MIR20A
DUXAP8	Double Homeobox A Pseudogene 8	Pseudogene	10	GC22P015784	1.3733	https://www.genecards.org/cgi-bin/carddisp.pl?gene=DUXAP8
TGFB2	Transforming Growth Factor Beta 2	Protein Coding	58	GC01P218345	1.37037	https://www.genecards.org/cgi-bin/carddisp.pl?gene=TGFB2
AQP3	Aquaporin 3 (Gill Blood Group)	Protein Coding	52	GC09M033431	1.37037	https://www.genecards.org/cgi-bin/carddisp.pl?gene=AQP3
CTNND1	Catenin Delta 1	Protein Coding	52	GC11P058206	1.37037	https://www.genecards.org/cgi-bin/carddisp.pl?gene=CTNND1
MDM4	MDM4 Regulator Of P53	Protein Coding	52	GC01P204516	1.37037	https://www.genecards.org/cgi-bin/carddisp.pl?gene=MDM4
UBE2C	Ubiquitin Conjugating Enzyme E2 C	Protein Coding	52	GC20P045812	1.37037	https://www.genecards.org/cgi-bin/carddisp.pl?gene=UBE2C
SH3BP2	SH3 Domain Binding Protein 2	Protein Coding	47	GC04P002794	1.37037	https://www.genecards.org/cgi-bin/carddisp.pl?gene=SH3BP2
MIR4435-2HG	MIR4435-2 Host Gene	RNA Gene	21	GC02M111521	1.37037	https://www.genecards.org/cgi-bin/carddisp.pl?gene=MIR4435-2HG
SCD	Stearoyl-CoA Desaturase	Protein Coding	57	GC10P100347	1.35546	https://www.genecards.org/cgi-bin/carddisp.pl?gene=SCD
EPCAM	Epithelial Cell Adhesion Molecule	Protein Coding	56	GC02P047345	1.35546	https://www.genecards.org/cgi-bin/carddisp.pl?gene=EPCAM
BAP1	BRCA1 Associated Protein 1	Protein Coding	54	GC03M052401	1.35546	https://www.genecards.org/cgi-bin/carddisp.pl?gene=BAP1
CHRNA3	Cholinergic Receptor Nicotinic Alpha 3 Subunit	Protein Coding	52	GC15M122411	1.35546	https://www.genecards.org/cgi-bin/carddisp.pl?gene=CHRNA3
EFEMP1	EGF Containing Fibulin Extracellular Matrix Protein 1	Protein Coding	52	GC02M055865	1.35546	https://www.genecards.org/cgi-bin/carddisp.pl?gene=EFEMP1
LRAT	Lecithin Retinol Acyltransferase	Protein Coding	51	GC04P154626	1.35546	https://www.genecards.org/cgi-bin/carddisp.pl?gene=LRAT
GAS1	Growth Arrest Specific 1	Protein Coding	49	GC09M086944	1.35546	https://www.genecards.org/cgi-bin/carddisp.pl?gene=GAS1
IFNL2	Interferon Lambda 2	Protein Coding	42	GC19P039268	1.35546	https://www.genecards.org/cgi-bin/carddisp.pl?gene=IFNL2
MIR138-1	MicroRNA 138-1	RNA Gene	23	GC03P044115	1.35546	https://www.genecards.org/cgi-bin/carddisp.pl?gene=MIR138-1
MIR3658	MicroRNA 3658	RNA Gene	13	GC01P165907	1.35546	https://www.genecards.org/cgi-bin/carddisp.pl?gene=MIR3658
COL1A2	Collagen Type I Alpha 2 Chain	Protein Coding	54	GC07P094394	1.34139	https://www.genecards.org/cgi-bin/carddisp.pl?gene=COL1A2
LIN28A	Lin-28 Homolog A	Protein Coding	46	GC01P026410	1.34139	https://www.genecards.org/cgi-bin/carddisp.pl?gene=LIN28A
UPK1B	Uroplakin 1B	Protein Coding	42	GC03P119173	1.34139	https://www.genecards.org/cgi-bin/carddisp.pl?gene=UPK1B
MIR152	MicroRNA 152	RNA Gene	23	GC17M048037	1.34139	https://www.genecards.org/cgi-bin/carddisp.pl?gene=MIR152
TSC2	TSC Complex Subunit 2	Protein Coding	56	GC16P013513	1.33697	https://www.genecards.org/cgi-bin/carddisp.pl?gene=TSC2
PYCR1	Pyrroline-5-Carboxylate Reductase 1	Protein Coding	52	GC17M081932	1.33697	https://www.genecards.org/cgi-bin/carddisp.pl?gene=PYCR1
HMMR	Hyaluronan Mediated Motility Receptor	Protein Coding	50	GC05P163480	1.33697	https://www.genecards.org/cgi-bin/carddisp.pl?gene=HMMR
CMTM8	CKLF Like MARVEL Transmembrane Domain Containing 8	Protein Coding	43	GC03P032238	1.33697	https://www.genecards.org/cgi-bin/carddisp.pl?gene=CMTM8
SOX14	SRY-Box Transcription Factor 14	Protein Coding	43	GC03P137764	1.33697	https://www.genecards.org/cgi-bin/carddisp.pl?gene=SOX14
MIR101-2	MicroRNA 101-2	RNA Gene	19	GC09P004867	1.33697	https://www.genecards.org/cgi-bin/carddisp.pl?gene=MIR101-2
CCR5	C-C Motif Chemokine Receptor 5	Protein Coding	53	GC03P047615	1.33418	https://www.genecards.org/cgi-bin/carddisp.pl?gene=CCR5
PDGFRA	Platelet Derived Growth Factor Receptor Alpha	Protein Coding	60	GC04P054229	1.33091	https://www.genecards.org/cgi-bin/carddisp.pl?gene=PDGFRA
MIR106B	MicroRNA 106b	RNA Gene	24	GC07M102261	1.33091	https://www.genecards.org/cgi-bin/carddisp.pl?gene=MIR106B
MIR196A1	MicroRNA 196a-1	RNA Gene	24	GC17M048632	1.33091	https://www.genecards.org/cgi-bin/carddisp.pl?gene=MIR196A1
MIR106A	MicroRNA 106a	RNA Gene	21	GC0XM134339	1.33091	https://www.genecards.org/cgi-bin/carddisp.pl?gene=MIR106A
MIR361	MicroRNA 361	RNA Gene	19	GC0XM085903	1.33091	https://www.genecards.org/cgi-bin/carddisp.pl?gene=MIR361
DCN	Decorin	Protein Coding	54	GC12M091140	1.31776	https://www.genecards.org/cgi-bin/carddisp.pl?gene=DCN
HK2	Hexokinase 2	Protein Coding	52	GC02P074833	1.31776	https://www.genecards.org/cgi-bin/carddisp.pl?gene=HK2
HIPK2	Homeodomain Interacting Protein Kinase 2	Protein Coding	51	GC07M139561	1.31776	https://www.genecards.org/cgi-bin/carddisp.pl?gene=HIPK2
ZBTB7A	Zinc Finger And BTB Domain Containing 7A	Protein Coding	44	GC19M006838	1.31776	https://www.genecards.org/cgi-bin/carddisp.pl?gene=ZBTB7A
NUPR1	Nuclear Protein 1, Transcriptional Regulator	Protein Coding	40	GC16M028532	1.31776	https://www.genecards.org/cgi-bin/carddisp.pl?gene=NUPR1
CFAP57	Cilia And Flagella Associated Protein 57	Protein Coding	37	GC01P043172	1.31776	https://www.genecards.org/cgi-bin/carddisp.pl?gene=CFAP57
FAM162B	Family With Sequence Similarity 162 Member B	Protein Coding	36	GC06M116752	1.31776	https://www.genecards.org/cgi-bin/carddisp.pl?gene=FAM162B
ADAMTS9-AS2	ADAMTS9 Antisense RNA 2	RNA Gene	21	GC03P064671	1.31776	https://www.genecards.org/cgi-bin/carddisp.pl?gene=ADAMTS9-AS2
MIR1-2	MicroRNA 1-2	RNA Gene	19	GC18M027631	1.31776	https://www.genecards.org/cgi-bin/carddisp.pl?gene=MIR1-2
MIR495	MicroRNA 495	RNA Gene	19	GC14P110929	1.31776	https://www.genecards.org/cgi-bin/carddisp.pl?gene=MIR495
MIR576	MicroRNA 576	RNA Gene	18	GC04P109488	1.31776	https://www.genecards.org/cgi-bin/carddisp.pl?gene=MIR576
CXCR2	C-X-C Motif Chemokine Receptor 2	Protein Coding	57	GC02P218125	1.30932	https://www.genecards.org/cgi-bin/carddisp.pl?gene=CXCR2
CYLD	CYLD Lysine 63 Deubiquitinase	Protein Coding	55	GC16P050742	1.30932	https://www.genecards.org/cgi-bin/carddisp.pl?gene=CYLD
FSCN1	Fascin Actin-Bundling Protein 1	Protein Coding	51	GC07P005592	1.30932	https://www.genecards.org/cgi-bin/carddisp.pl?gene=FSCN1
CDC20	Cell Division Cycle 20	Protein Coding	50	GC01P043358	1.30932	https://www.genecards.org/cgi-bin/carddisp.pl?gene=CDC20
CD276	CD276 Molecule	Protein Coding	49	GC15P073683	1.30932	https://www.genecards.org/cgi-bin/carddisp.pl?gene=CD276
DKK3	Dickkopf WNT Signaling Pathway Inhibitor 3	Protein Coding	48	GC11M011962	1.30932	https://www.genecards.org/cgi-bin/carddisp.pl?gene=DKK3
IQGAP3	IQ Motif Containing GTPase Activating Protein 3	Protein Coding	46	GC01M156525	1.30932	https://www.genecards.org/cgi-bin/carddisp.pl?gene=IQGAP3
CCL18	C-C Motif Chemokine Ligand 18	Protein Coding	42	GC17P036064	1.30932	https://www.genecards.org/cgi-bin/carddisp.pl?gene=CCL18
AKT3	AKT Serine/Threonine Kinase 3	Protein Coding	61	GC01M243488	1.29773	https://www.genecards.org/cgi-bin/carddisp.pl?gene=AKT3
EIF4E	Eukaryotic Translation Initiation Factor 4E	Protein Coding	56	GC04M098879	1.29773	https://www.genecards.org/cgi-bin/carddisp.pl?gene=EIF4E
IL6ST	Interleukin 6 Cytokine Family Signal Transducer	Protein Coding	56	GC05M055935	1.29773	https://www.genecards.org/cgi-bin/carddisp.pl?gene=IL6ST
PRKAA1	Protein Kinase AMP-Activated Catalytic Subunit Alpha 1	Protein Coding	54	GC05M040759	1.29773	https://www.genecards.org/cgi-bin/carddisp.pl?gene=PRKAA1
ETS1	ETS Proto-Oncogene 1, Transcription Factor	Protein Coding	53	GC11M128458	1.29773	https://www.genecards.org/cgi-bin/carddisp.pl?gene=ETS1
TKT	Transketolase	Protein Coding	52	GC03M053224	1.29773	https://www.genecards.org/cgi-bin/carddisp.pl?gene=TKT
ESM1	Endothelial Cell Specific Molecule 1	Protein Coding	46	GC05M054977	1.29773	https://www.genecards.org/cgi-bin/carddisp.pl?gene=ESM1
IL20	Interleukin 20	Protein Coding	45	GC01P206866	1.29773	https://www.genecards.org/cgi-bin/carddisp.pl?gene=IL20
PCDH17	Protocadherin 17	Protein Coding	44	GC13P057630	1.29773	https://www.genecards.org/cgi-bin/carddisp.pl?gene=PCDH17
THBS2	Thrombospondin 2	Protein Coding	53	GC06M169215	1.29452	https://www.genecards.org/cgi-bin/carddisp.pl?gene=THBS2
MIR18A	MicroRNA 18a	RNA Gene	21	GC13P091583	1.29452	https://www.genecards.org/cgi-bin/carddisp.pl?gene=MIR18A
MIR486-1	MicroRNA 486-1	RNA Gene	21	GC08M041660	1.29452	https://www.genecards.org/cgi-bin/carddisp.pl?gene=MIR486-1
MIR877	MicroRNA 877	RNA Gene	21	GC06P030584	1.29452	https://www.genecards.org/cgi-bin/carddisp.pl?gene=MIR877
CTSD	Cathepsin D	Protein Coding	59	GC11M001752	1.27677	https://www.genecards.org/cgi-bin/carddisp.pl?gene=CTSD
RHEB	Ras Homolog, MTORC1 Binding	Protein Coding	56	GC07M151466	1.27677	https://www.genecards.org/cgi-bin/carddisp.pl?gene=RHEB
SERPINA1	Serpin Family A Member 1	Protein Coding	56	GC14M094376	1.27677	https://www.genecards.org/cgi-bin/carddisp.pl?gene=SERPINA1
CSTB	Cystatin B	Protein Coding	53	GC21M043772	1.27677	https://www.genecards.org/cgi-bin/carddisp.pl?gene=CSTB
IRS2	Insulin Receptor Substrate 2	Protein Coding	51	GC13M109752	1.27677	https://www.genecards.org/cgi-bin/carddisp.pl?gene=IRS2
RPTOR	Regulatory Associated Protein Of MTOR Complex 1	Protein Coding	51	GC17P080544	1.27677	https://www.genecards.org/cgi-bin/carddisp.pl?gene=RPTOR
VEGFB	Vascular Endothelial Growth Factor B	Protein Coding	51	GC11P064234	1.27677	https://www.genecards.org/cgi-bin/carddisp.pl?gene=VEGFB
TNFRSF14	TNF Receptor Superfamily Member 14	Protein Coding	50	GC01P004431	1.27677	https://www.genecards.org/cgi-bin/carddisp.pl?gene=TNFRSF14
DDX20	DEAD-Box Helicase 20	Protein Coding	49	GC01P111755	1.27677	https://www.genecards.org/cgi-bin/carddisp.pl?gene=DDX20
FUT7	Fucosyltransferase 7	Protein Coding	48	GC09M137030	1.27677	https://www.genecards.org/cgi-bin/carddisp.pl?gene=FUT7
GPRC5A	G Protein-Coupled Receptor Class C Group 5 Member A	Protein Coding	48	GC12P023772	1.27677	https://www.genecards.org/cgi-bin/carddisp.pl?gene=GPRC5A
HAS3	Hyaluronan Synthase 3	Protein Coding	48	GC16P069105	1.27677	https://www.genecards.org/cgi-bin/carddisp.pl?gene=HAS3
PFKFB4	6-Phosphofructo-2-Kinase/Fructose-2,6-Biphosphatase 4	Protein Coding	48	GC03M048517	1.27677	https://www.genecards.org/cgi-bin/carddisp.pl?gene=PFKFB4
PTMA	Prothymosin Alpha	Protein Coding	48	GC02P231838	1.27677	https://www.genecards.org/cgi-bin/carddisp.pl?gene=PTMA
RAB23	RAB23, Member RAS Oncogene Family	Protein Coding	48	GC06M072175	1.27677	https://www.genecards.org/cgi-bin/carddisp.pl?gene=RAB23
SUZ12	SUZ12 Polycomb Repressive Complex 2 Subunit	Protein Coding	48	GC17P031937	1.27677	https://www.genecards.org/cgi-bin/carddisp.pl?gene=SUZ12
TRIP13	Thyroid Hormone Receptor Interactor 13	Protein Coding	47	GC05P000892	1.27677	https://www.genecards.org/cgi-bin/carddisp.pl?gene=TRIP13
KLF2	KLF Transcription Factor 2	Protein Coding	46	GC19P072385	1.27677	https://www.genecards.org/cgi-bin/carddisp.pl?gene=KLF2
TPPP	Tubulin Polymerization Promoting Protein	Protein Coding	46	GC05M000659	1.27677	https://www.genecards.org/cgi-bin/carddisp.pl?gene=TPPP
LRIG3	Leucine Rich Repeats And Immunoglobulin Like Domains 3	Protein Coding	44	GC12M058872	1.27677	https://www.genecards.org/cgi-bin/carddisp.pl?gene=LRIG3
UGT1A3	UDP Glucuronosyltransferase Family 1 Member A3	Protein Coding	44	GC02P233729	1.27677	https://www.genecards.org/cgi-bin/carddisp.pl?gene=UGT1A3
AHRR	Aryl Hydrocarbon Receptor Repressor	Protein Coding	42	GC05P000321	1.27677	https://www.genecards.org/cgi-bin/carddisp.pl?gene=AHRR
DERL1	Derlin 1	Protein Coding	42	GC08M123013	1.27677	https://www.genecards.org/cgi-bin/carddisp.pl?gene=DERL1
RTRAF	RNA Transcription, Translation And Transport Factor	Protein Coding	42	GC14P051992	1.27677	https://www.genecards.org/cgi-bin/carddisp.pl?gene=RTRAF
ZDHHC11	Zinc Finger DHHC-Type Containing 11	Protein Coding	41	GC05M000795	1.27677	https://www.genecards.org/cgi-bin/carddisp.pl?gene=ZDHHC11
HYKK	Hydroxylysine Kinase	Protein Coding	38	GC15P078507	1.27677	https://www.genecards.org/cgi-bin/carddisp.pl?gene=HYKK
MIR130A	MicroRNA 130a	RNA Gene	24	GC11P057641	1.27677	https://www.genecards.org/cgi-bin/carddisp.pl?gene=MIR130A
MIR542	MicroRNA 542	RNA Gene	20	GC0XM134698	1.27677	https://www.genecards.org/cgi-bin/carddisp.pl?gene=MIR542
SPRY4-AS1	SPRY4 Antisense RNA 1	RNA Gene	18	GC05P146898	1.27677	https://www.genecards.org/cgi-bin/carddisp.pl?gene=SPRY4-AS1
G2E3-AS1	G2E3 Antisense RNA 1	RNA Gene	16	GC14M030378	1.27677	https://www.genecards.org/cgi-bin/carddisp.pl?gene=G2E3-AS1
ARAP1-AS1	ARAP1 Antisense RNA 1	RNA Gene	14	GC11P072685	1.27677	https://www.genecards.org/cgi-bin/carddisp.pl?gene=ARAP1-AS1
DDN-AS1	DDN And PRKAG1 Antisense RNA 1	RNA Gene	14	GC12P049572	1.27677	https://www.genecards.org/cgi-bin/carddisp.pl?gene=DDN-AS1
LOC111365141	NOS2 5' Regulatory Region	Functional Element	3	GC17P027800	1.27677	https://www.genecards.org/cgi-bin/carddisp.pl?gene=LOC111365141
MAD1L1	Mitotic Arrest Deficient 1 Like 1	Protein Coding	52	GC07M001815	1.27597	https://www.genecards.org/cgi-bin/carddisp.pl?gene=MAD1L1
SLC16A1	Solute Carrier Family 16 Member 1	Protein Coding	54	GC01M113013	1.27293	https://www.genecards.org/cgi-bin/carddisp.pl?gene=SLC16A1
LIMK2	LIM Domain Kinase 2	Protein Coding	52	GC22P031212	1.27293	https://www.genecards.org/cgi-bin/carddisp.pl?gene=LIMK2
EPHB4	EPH Receptor B4	Protein Coding	60	GC07M102433	1.25473	https://www.genecards.org/cgi-bin/carddisp.pl?gene=EPHB4
SMAD4	SMAD Family Member 4	Protein Coding	59	GC18P051028	1.25473	https://www.genecards.org/cgi-bin/carddisp.pl?gene=SMAD4
GLS	Glutaminase	Protein Coding	56	GC02P190880	1.25473	https://www.genecards.org/cgi-bin/carddisp.pl?gene=GLS
ADAM9	ADAM Metallopeptidase Domain 9	Protein Coding	55	GC08P038996	1.25473	https://www.genecards.org/cgi-bin/carddisp.pl?gene=ADAM9
BRD4	Bromodomain Containing 4	Protein Coding	55	GC19M015236	1.25473	https://www.genecards.org/cgi-bin/carddisp.pl?gene=BRD4
MTAP	Methylthioadenosine Phosphorylase	Protein Coding	55	GC09P021792	1.25473	https://www.genecards.org/cgi-bin/carddisp.pl?gene=MTAP
MYH9	Myosin Heavy Chain 9	Protein Coding	55	GC22M036281	1.25473	https://www.genecards.org/cgi-bin/carddisp.pl?gene=MYH9
POLH	DNA Polymerase Eta	Protein Coding	55	GC06P043576	1.25473	https://www.genecards.org/cgi-bin/carddisp.pl?gene=POLH
ESRRB	Estrogen Related Receptor Beta	Protein Coding	54	GC14P076310	1.25473	https://www.genecards.org/cgi-bin/carddisp.pl?gene=ESRRB
NR4A1	Nuclear Receptor Subfamily 4 Group A Member 1	Protein Coding	54	GC12P052022	1.25473	https://www.genecards.org/cgi-bin/carddisp.pl?gene=NR4A1
SEMA4D	Semaphorin 4D	Protein Coding	53	GC09M089360	1.25473	https://www.genecards.org/cgi-bin/carddisp.pl?gene=SEMA4D
CCNB2	Cyclin B2	Protein Coding	51	GC15P059105	1.25473	https://www.genecards.org/cgi-bin/carddisp.pl?gene=CCNB2
ROBO1	Roundabout Guidance Receptor 1	Protein Coding	51	GC03M078597	1.25473	https://www.genecards.org/cgi-bin/carddisp.pl?gene=ROBO1
JARID2	Jumonji And AT-Rich Interaction Domain Containing 2	Protein Coding	50	GC06P015246	1.25473	https://www.genecards.org/cgi-bin/carddisp.pl?gene=JARID2
LOXL4	Lysyl Oxidase Like 4	Protein Coding	50	GC10M098247	1.25473	https://www.genecards.org/cgi-bin/carddisp.pl?gene=LOXL4
PDCD4	Programmed Cell Death 4	Protein Coding	50	GC10P110871	1.25473	https://www.genecards.org/cgi-bin/carddisp.pl?gene=PDCD4
PDPN	Podoplanin	Protein Coding	48	GC01P013583	1.25473	https://www.genecards.org/cgi-bin/carddisp.pl?gene=PDPN
S100A11	S100 Calcium Binding Protein A11	Protein Coding	48	GC01M152032	1.25473	https://www.genecards.org/cgi-bin/carddisp.pl?gene=S100A11
SMYD3	SET And MYND Domain Containing 3	Protein Coding	48	GC01M245749	1.25473	https://www.genecards.org/cgi-bin/carddisp.pl?gene=SMYD3
CWC27	CWC27 Spliceosome Associated Cyclophilin	Protein Coding	47	GC05P064768	1.25473	https://www.genecards.org/cgi-bin/carddisp.pl?gene=CWC27
PCDH10	Protocadherin 10	Protein Coding	46	GC04P133149	1.25473	https://www.genecards.org/cgi-bin/carddisp.pl?gene=PCDH10
XAF1	XIAP Associated Factor 1	Protein Coding	46	GC17P006757	1.25473	https://www.genecards.org/cgi-bin/carddisp.pl?gene=XAF1
NUDT6	Nudix Hydrolase 6	Protein Coding	43	GC04M122888	1.25473	https://www.genecards.org/cgi-bin/carddisp.pl?gene=NUDT6
MIR432	MicroRNA 432	RNA Gene	20	GC14P110570	1.25473	https://www.genecards.org/cgi-bin/carddisp.pl?gene=MIR432
PDGFB	Platelet Derived Growth Factor Subunit B	Protein Coding	58	GC22M062326	1.25135	https://www.genecards.org/cgi-bin/carddisp.pl?gene=PDGFB
OGA	O-GlcNAcase	Protein Coding	47	GC10M101785	1.25135	https://www.genecards.org/cgi-bin/carddisp.pl?gene=OGA
MIR15A	MicroRNA 15a	RNA Gene	18	GC13M050049	1.25135	https://www.genecards.org/cgi-bin/carddisp.pl?gene=MIR15A
SERPINE1	Serpin Family E Member 1	Protein Coding	57	GC07P101127	1.23142	https://www.genecards.org/cgi-bin/carddisp.pl?gene=SERPINE1
TF	Transferrin	Protein Coding	57	GC03P135056	1.23142	https://www.genecards.org/cgi-bin/carddisp.pl?gene=TF
BDNF	Brain Derived Neurotrophic Factor	Protein Coding	56	GC11M027654	1.23142	https://www.genecards.org/cgi-bin/carddisp.pl?gene=BDNF
MAPKAPK2	MAPK Activated Protein Kinase 2	Protein Coding	54	GC01P206684	1.23142	https://www.genecards.org/cgi-bin/carddisp.pl?gene=MAPKAPK2
UBE2I	Ubiquitin Conjugating Enzyme E2 I	Protein Coding	54	GC16P013462	1.23142	https://www.genecards.org/cgi-bin/carddisp.pl?gene=UBE2I
KRT1	Keratin 1	Protein Coding	53	GC12M052674	1.23142	https://www.genecards.org/cgi-bin/carddisp.pl?gene=KRT1
FANCD2	FA Complementation Group D2	Protein Coding	52	GC03P010026	1.23142	https://www.genecards.org/cgi-bin/carddisp.pl?gene=FANCD2
PRDX2	Peroxiredoxin 2	Protein Coding	52	GC19M012796	1.23142	https://www.genecards.org/cgi-bin/carddisp.pl?gene=PRDX2
ING1	Inhibitor Of Growth Family Member 1	Protein Coding	50	GC13P110712	1.23142	https://www.genecards.org/cgi-bin/carddisp.pl?gene=ING1
NRG4	Neuregulin 4	Protein Coding	46	GC15M075935	1.23142	https://www.genecards.org/cgi-bin/carddisp.pl?gene=NRG4
FOXF2	Forkhead Box F2	Protein Coding	41	GC06P001390	1.23142	https://www.genecards.org/cgi-bin/carddisp.pl?gene=FOXF2
TMEM40	Transmembrane Protein 40	Protein Coding	37	GC03M012733	1.23142	https://www.genecards.org/cgi-bin/carddisp.pl?gene=TMEM40
TP73-AS1	TP73 Antisense RNA 1	RNA Gene	25	GC01M007549	1.23142	https://www.genecards.org/cgi-bin/carddisp.pl?gene=TP73-AS1
MIR497	MicroRNA 497	RNA Gene	22	GC17M007044	1.23142	https://www.genecards.org/cgi-bin/carddisp.pl?gene=MIR497
MIRLET7G	MicroRNA Let-7g	RNA Gene	22	GC03M052268	1.23142	https://www.genecards.org/cgi-bin/carddisp.pl?gene=MIRLET7G
LUCAT1	Lung Cancer Associated Transcript 1	RNA Gene	19	GC05M091054	1.23142	https://www.genecards.org/cgi-bin/carddisp.pl?gene=LUCAT1
LINC00857	Long Intergenic Non-Protein Coding RNA 857	RNA Gene	18	GC10P094468	1.23142	https://www.genecards.org/cgi-bin/carddisp.pl?gene=LINC00857
SMAD3	SMAD Family Member 3	Protein Coding	59	GC15P067063	1.20661	https://www.genecards.org/cgi-bin/carddisp.pl?gene=SMAD3
CREB1	CAMP Responsive Element Binding Protein 1	Protein Coding	56	GC02P207529	1.20661	https://www.genecards.org/cgi-bin/carddisp.pl?gene=CREB1
CIT	Citron Rho-Interacting Serine/Threonine Kinase	Protein Coding	54	GC12M119687	1.20661	https://www.genecards.org/cgi-bin/carddisp.pl?gene=CIT
HLA-A	Major Histocompatibility Complex, Class I, A	Protein Coding	52	GC06P092113	1.20661	https://www.genecards.org/cgi-bin/carddisp.pl?gene=HLA-A
HYOU1	Hypoxia Up-Regulated 1	Protein Coding	52	GC11M119272	1.20661	https://www.genecards.org/cgi-bin/carddisp.pl?gene=HYOU1
POLR2B	RNA Polymerase II Subunit B	Protein Coding	51	GC04P056977	1.20661	https://www.genecards.org/cgi-bin/carddisp.pl?gene=POLR2B
USP2	Ubiquitin Specific Peptidase 2	Protein Coding	51	GC11M119355	1.20661	https://www.genecards.org/cgi-bin/carddisp.pl?gene=USP2
POLR2E	RNA Polymerase II, I And III Subunit E	Protein Coding	49	GC19M001086	1.20661	https://www.genecards.org/cgi-bin/carddisp.pl?gene=POLR2E
UGT1A6	UDP Glucuronosyltransferase Family 1 Member A6	Protein Coding	48	GC02P233691	1.20661	https://www.genecards.org/cgi-bin/carddisp.pl?gene=UGT1A6
DLGAP5	DLG Associated Protein 5	Protein Coding	46	GC14M055148	1.20661	https://www.genecards.org/cgi-bin/carddisp.pl?gene=DLGAP5
CBX8	Chromobox 8	Protein Coding	44	GC17M079794	1.20661	https://www.genecards.org/cgi-bin/carddisp.pl?gene=CBX8
ASPM	Assembly Factor For Spindle Microtubules	Protein Coding	43	GC01M197084	1.20661	https://www.genecards.org/cgi-bin/carddisp.pl?gene=ASPM
FAM107A	Family With Sequence Similarity 107 Member A	Protein Coding	43	GC03M058767	1.20661	https://www.genecards.org/cgi-bin/carddisp.pl?gene=FAM107A
MAGEA3	MAGE Family Member A3	Protein Coding	43	GC0XP152698	1.20661	https://www.genecards.org/cgi-bin/carddisp.pl?gene=MAGEA3
SKA1	Spindle And Kinetochore Associated Complex Subunit 1	Protein Coding	43	GC18P050374	1.20661	https://www.genecards.org/cgi-bin/carddisp.pl?gene=SKA1
TEF	TEF Transcription Factor, PAR BZIP Family Member	Protein Coding	43	GC22P041367	1.20661	https://www.genecards.org/cgi-bin/carddisp.pl?gene=TEF
ROMO1	Reactive Oxygen Species Modulator 1	Protein Coding	40	GC20P035699	1.20661	https://www.genecards.org/cgi-bin/carddisp.pl?gene=ROMO1
SNHG7	Small Nucleolar RNA Host Gene 7	RNA Gene	24	GC09M137739	1.20661	https://www.genecards.org/cgi-bin/carddisp.pl?gene=SNHG7
MIR449A	MicroRNA 449a	RNA Gene	23	GC05M055171	1.20661	https://www.genecards.org/cgi-bin/carddisp.pl?gene=MIR449A
MIR429	MicroRNA 429	RNA Gene	22	GC01P004366	1.20661	https://www.genecards.org/cgi-bin/carddisp.pl?gene=MIR429
LOC110806263	TERT 5' Regulatory Region	Functional Element	4	GC05P001294	1.20661	https://www.genecards.org/cgi-bin/carddisp.pl?gene=LOC110806263
MIR211	MicroRNA 211	RNA Gene	24	GC15M031065	1.19509	https://www.genecards.org/cgi-bin/carddisp.pl?gene=MIR211
MIR29B1	MicroRNA 29b-1	RNA Gene	23	GC07M130877	1.19509	https://www.genecards.org/cgi-bin/carddisp.pl?gene=MIR29B1
MIR454	MicroRNA 454	RNA Gene	22	GC17M059137	1.19509	https://www.genecards.org/cgi-bin/carddisp.pl?gene=MIR454
MIR590	MicroRNA 590	RNA Gene	22	GC07P074191	1.19509	https://www.genecards.org/cgi-bin/carddisp.pl?gene=MIR590
MIR181A1	MicroRNA 181a-1	RNA Gene	21	GC01M198860	1.19509	https://www.genecards.org/cgi-bin/carddisp.pl?gene=MIR181A1
MIR605	MicroRNA 605	RNA Gene	19	GC10P051299	1.19509	https://www.genecards.org/cgi-bin/carddisp.pl?gene=MIR605
NPM1	Nucleophosmin 1	Protein Coding	57	GC05P171387	1.17996	https://www.genecards.org/cgi-bin/carddisp.pl?gene=NPM1
SMO	Smoothened, Frizzled Class Receptor	Protein Coding	57	GC07P132495	1.17996	https://www.genecards.org/cgi-bin/carddisp.pl?gene=SMO
EDNRA	Endothelin Receptor Type A	Protein Coding	56	GC04P147480	1.17996	https://www.genecards.org/cgi-bin/carddisp.pl?gene=EDNRA
LMNA	Lamin A/C	Protein Coding	56	GC01P156082	1.17996	https://www.genecards.org/cgi-bin/carddisp.pl?gene=LMNA
RUNX1	RUNX Family Transcription Factor 1	Protein Coding	56	GC21M034787	1.17996	https://www.genecards.org/cgi-bin/carddisp.pl?gene=RUNX1
POLE	DNA Polymerase Epsilon, Catalytic Subunit	Protein Coding	55	GC12M132700	1.17996	https://www.genecards.org/cgi-bin/carddisp.pl?gene=POLE
SLC29A1	Solute Carrier Family 29 Member 1 (Augustine Blood Group)	Protein Coding	55	GC06P044219	1.17996	https://www.genecards.org/cgi-bin/carddisp.pl?gene=SLC29A1
CYBA	Cytochrome B-245 Alpha Chain	Protein Coding	54	GC16M088643	1.17996	https://www.genecards.org/cgi-bin/carddisp.pl?gene=CYBA
DLL4	Delta Like Canonical Notch Ligand 4	Protein Coding	54	GC15P040929	1.17996	https://www.genecards.org/cgi-bin/carddisp.pl?gene=DLL4
VHL	Von Hippel-Lindau Tumor Suppressor	Protein Coding	54	GC03P013681	1.17996	https://www.genecards.org/cgi-bin/carddisp.pl?gene=VHL
DDB2	Damage Specific DNA Binding Protein 2	Protein Coding	53	GC11P047237	1.17996	https://www.genecards.org/cgi-bin/carddisp.pl?gene=DDB2
HMGA1	High Mobility Group AT-Hook 1	Protein Coding	53	GC06P092259	1.17996	https://www.genecards.org/cgi-bin/carddisp.pl?gene=HMGA1
POLG	DNA Polymerase Gamma, Catalytic Subunit	Protein Coding	53	GC15M122742	1.17996	https://www.genecards.org/cgi-bin/carddisp.pl?gene=POLG
PPP1CA	Protein Phosphatase 1 Catalytic Subunit Alpha	Protein Coding	53	GC11M099806	1.17996	https://www.genecards.org/cgi-bin/carddisp.pl?gene=PPP1CA
PTCH2	Patched 2	Protein Coding	53	GC01M044819	1.17996	https://www.genecards.org/cgi-bin/carddisp.pl?gene=PTCH2
RFC1	Replication Factor C Subunit 1	Protein Coding	53	GC04M039291	1.17996	https://www.genecards.org/cgi-bin/carddisp.pl?gene=RFC1
RPA1	Replication Protein A1	Protein Coding	53	GC17P001829	1.17996	https://www.genecards.org/cgi-bin/carddisp.pl?gene=RPA1
SERPINF1	Serpin Family F Member 1	Protein Coding	53	GC17P001766	1.17996	https://www.genecards.org/cgi-bin/carddisp.pl?gene=SERPINF1
UNG	Uracil DNA Glycosylase	Protein Coding	53	GC12P109097	1.17996	https://www.genecards.org/cgi-bin/carddisp.pl?gene=UNG
BCL2L11	BCL2 Like 11	Protein Coding	52	GC02P111119	1.17996	https://www.genecards.org/cgi-bin/carddisp.pl?gene=BCL2L11
SOX9	SRY-Box Transcription Factor 9	Protein Coding	52	GC17P072121	1.17996	https://www.genecards.org/cgi-bin/carddisp.pl?gene=SOX9
TBX2	T-Box Transcription Factor 2	Protein Coding	52	GC17P061399	1.17996	https://www.genecards.org/cgi-bin/carddisp.pl?gene=TBX2
ADGRG6	Adhesion G Protein-Coupled Receptor G6	Protein Coding	51	GC06P142301	1.17996	https://www.genecards.org/cgi-bin/carddisp.pl?gene=ADGRG6
BTC	Betacellulin	Protein Coding	51	GC04M074744	1.17996	https://www.genecards.org/cgi-bin/carddisp.pl?gene=BTC
POLR2A	RNA Polymerase II Subunit A	Protein Coding	51	GC17P011734	1.17996	https://www.genecards.org/cgi-bin/carddisp.pl?gene=POLR2A
REV3L	REV3 Like, DNA Directed Polymerase Zeta Catalytic Subunit	Protein Coding	51	GC06M111299	1.17996	https://www.genecards.org/cgi-bin/carddisp.pl?gene=REV3L
RFC2	Replication Factor C Subunit 2	Protein Coding	51	GC07M074231	1.17996	https://www.genecards.org/cgi-bin/carddisp.pl?gene=RFC2
CRK	CRK Proto-Oncogene, Adaptor Protein	Protein Coding	50	GC17M001420	1.17996	https://www.genecards.org/cgi-bin/carddisp.pl?gene=CRK
POLL	DNA Polymerase Lambda	Protein Coding	50	GC10M101578	1.17996	https://www.genecards.org/cgi-bin/carddisp.pl?gene=POLL
POLRMT	RNA Polymerase Mitochondrial	Protein Coding	50	GC19M000617	1.17996	https://www.genecards.org/cgi-bin/carddisp.pl?gene=POLRMT
RAD51C	RAD51 Paralog C	Protein Coding	50	GC17P058692	1.17996	https://www.genecards.org/cgi-bin/carddisp.pl?gene=RAD51C
RFC4	Replication Factor C Subunit 4	Protein Coding	50	GC03M186789	1.17996	https://www.genecards.org/cgi-bin/carddisp.pl?gene=RFC4
RPA2	Replication Protein A2	Protein Coding	50	GC01M028119	1.17996	https://www.genecards.org/cgi-bin/carddisp.pl?gene=RPA2
ERCC8	ERCC Excision Repair 8, CSA Ubiquitin Ligase Complex Subunit	Protein Coding	49	GC05M060899	1.17996	https://www.genecards.org/cgi-bin/carddisp.pl?gene=ERCC8
POLK	DNA Polymerase Kappa	Protein Coding	49	GC05P075511	1.17996	https://www.genecards.org/cgi-bin/carddisp.pl?gene=POLK
POLE2	DNA Polymerase Epsilon 2, Accessory Subunit	Protein Coding	48	GC14M049643	1.17996	https://www.genecards.org/cgi-bin/carddisp.pl?gene=POLE2
TDG	Thymine DNA Glycosylase	Protein Coding	48	GC12P103965	1.17996	https://www.genecards.org/cgi-bin/carddisp.pl?gene=TDG
MPG	N-Methylpurine DNA Glycosylase	Protein Coding	47	GC16P013423	1.17996	https://www.genecards.org/cgi-bin/carddisp.pl?gene=MPG
POLA2	DNA Polymerase Alpha 2, Accessory Subunit	Protein Coding	47	GC11P070854	1.17996	https://www.genecards.org/cgi-bin/carddisp.pl?gene=POLA2
POLD2	DNA Polymerase Delta 2, Accessory Subunit	Protein Coding	47	GC07M044114	1.17996	https://www.genecards.org/cgi-bin/carddisp.pl?gene=POLD2
POLQ	DNA Polymerase Theta	Protein Coding	47	GC03M121431	1.17996	https://www.genecards.org/cgi-bin/carddisp.pl?gene=POLQ
POLR2C	RNA Polymerase II Subunit C	Protein Coding	47	GC16P057462	1.17996	https://www.genecards.org/cgi-bin/carddisp.pl?gene=POLR2C
POLR2D	RNA Polymerase II Subunit D	Protein Coding	47	GC02M128312	1.17996	https://www.genecards.org/cgi-bin/carddisp.pl?gene=POLR2D
POLR2F	RNA Polymerase II, I And III Subunit F	Protein Coding	47	GC22P037952	1.17996	https://www.genecards.org/cgi-bin/carddisp.pl?gene=POLR2F
RECQL4	RecQ Like Helicase 4	Protein Coding	47	GC08M145607	1.17996	https://www.genecards.org/cgi-bin/carddisp.pl?gene=RECQL4
RFC3	Replication Factor C Subunit 3	Protein Coding	47	GC13P033818	1.17996	https://www.genecards.org/cgi-bin/carddisp.pl?gene=RFC3
RPA3	Replication Protein A3	Protein Coding	47	GC07M008415	1.17996	https://www.genecards.org/cgi-bin/carddisp.pl?gene=RPA3
BIK	BCL2 Interacting Killer	Protein Coding	46	GC22P043110	1.17996	https://www.genecards.org/cgi-bin/carddisp.pl?gene=BIK
EN2	Engrailed Homeobox 2	Protein Coding	46	GC07P155459	1.17996	https://www.genecards.org/cgi-bin/carddisp.pl?gene=EN2
POLM	DNA Polymerase Mu	Protein Coding	46	GC07M044590	1.17996	https://www.genecards.org/cgi-bin/carddisp.pl?gene=POLM
POLR2J	RNA Polymerase II Subunit J	Protein Coding	46	GC07M102473	1.17996	https://www.genecards.org/cgi-bin/carddisp.pl?gene=POLR2J
RAD51D	RAD51 Paralog D	Protein Coding	46	GC17M035092	1.17996	https://www.genecards.org/cgi-bin/carddisp.pl?gene=RAD51D
RFC5	Replication Factor C Subunit 5	Protein Coding	46	GC12P118013	1.17996	https://www.genecards.org/cgi-bin/carddisp.pl?gene=RFC5
TET1	Tet Methylcytosine Dioxygenase 1	Protein Coding	46	GC10P068560	1.17996	https://www.genecards.org/cgi-bin/carddisp.pl?gene=TET1
TMEFF2	Transmembrane Protein With EGF Like And Two Follistatin Like Domains 2	Protein Coding	46	GC02M191950	1.17996	https://www.genecards.org/cgi-bin/carddisp.pl?gene=TMEFF2
POLD3	DNA Polymerase Delta 3, Accessory Subunit	Protein Coding	45	GC11P074496	1.17996	https://www.genecards.org/cgi-bin/carddisp.pl?gene=POLD3
EBAG9	Estrogen Receptor Binding Site Associated Antigen 9	Protein Coding	44	GC08P109536	1.17996	https://www.genecards.org/cgi-bin/carddisp.pl?gene=EBAG9
POLR2H	RNA Polymerase II, I And III Subunit H	Protein Coding	44	GC03P184361	1.17996	https://www.genecards.org/cgi-bin/carddisp.pl?gene=POLR2H
CBX7	Chromobox 7	Protein Coding	43	GC22M061481	1.17996	https://www.genecards.org/cgi-bin/carddisp.pl?gene=CBX7
POLR2K	RNA Polymerase II, I And III Subunit K	Protein Coding	42	GC08P100150	1.17996	https://www.genecards.org/cgi-bin/carddisp.pl?gene=POLR2K
CD24	CD24 Molecule	Protein Coding	41	GC06M106969	1.17996	https://www.genecards.org/cgi-bin/carddisp.pl?gene=CD24
CCDC34	Coiled-Coil Domain Containing 34	Protein Coding	37	GC11M027327	1.17996	https://www.genecards.org/cgi-bin/carddisp.pl?gene=CCDC34
MIR328	MicroRNA 328	RNA Gene	22	GC16M067203	1.17996	https://www.genecards.org/cgi-bin/carddisp.pl?gene=MIR328
ASAP1-IT1	ASAP1 Intronic Transcript 1	RNA Gene	18	GC08M130295	1.17996	https://www.genecards.org/cgi-bin/carddisp.pl?gene=ASAP1-IT1
MIR663B	MicroRNA 663b	RNA Gene	16	GC02M134644	1.17996	https://www.genecards.org/cgi-bin/carddisp.pl?gene=MIR663B
CEBPA	CCAAT Enhancer Binding Protein Alpha	Protein Coding	53	GC19M033299	1.17535	https://www.genecards.org/cgi-bin/carddisp.pl?gene=CEBPA
FLT1	Fms Related Receptor Tyrosine Kinase 1	Protein Coding	57	GC13M028300	1.15097	https://www.genecards.org/cgi-bin/carddisp.pl?gene=FLT1
UGT1A1	UDP Glucuronosyltransferase Family 1 Member A1	Protein Coding	57	GC02P233760	1.15097	https://www.genecards.org/cgi-bin/carddisp.pl?gene=UGT1A1
GNAS	GNAS Complex Locus	Protein Coding	56	GC20P058839	1.15097	https://www.genecards.org/cgi-bin/carddisp.pl?gene=GNAS
HNRNPA1	Heterogeneous Nuclear Ribonucleoprotein A1	Protein Coding	55	GC12P054280	1.15097	https://www.genecards.org/cgi-bin/carddisp.pl?gene=HNRNPA1
HSPD1	Heat Shock Protein Family D (Hsp60) Member 1	Protein Coding	55	GC02M197486	1.15097	https://www.genecards.org/cgi-bin/carddisp.pl?gene=HSPD1
ATP7B	ATPase Copper Transporting Beta	Protein Coding	54	GC13M051930	1.15097	https://www.genecards.org/cgi-bin/carddisp.pl?gene=ATP7B
XDH	Xanthine Dehydrogenase	Protein Coding	54	GC02M031334	1.15097	https://www.genecards.org/cgi-bin/carddisp.pl?gene=XDH
CADM1	Cell Adhesion Molecule 1	Protein Coding	51	GC11M115169	1.15097	https://www.genecards.org/cgi-bin/carddisp.pl?gene=CADM1
CHI3L1	Chitinase 3 Like 1	Protein Coding	51	GC01M203148	1.15097	https://www.genecards.org/cgi-bin/carddisp.pl?gene=CHI3L1
HMBS	Hydroxymethylbilane Synthase	Protein Coding	51	GC11P119084	1.15097	https://www.genecards.org/cgi-bin/carddisp.pl?gene=HMBS
ADCY10	Adenylate Cyclase 10	Protein Coding	50	GC01M167809	1.15097	https://www.genecards.org/cgi-bin/carddisp.pl?gene=ADCY10
LCP1	Lymphocyte Cytosolic Protein 1	Protein Coding	49	GC13M046132	1.15097	https://www.genecards.org/cgi-bin/carddisp.pl?gene=LCP1
KIF4A	Kinesin Family Member 4A	Protein Coding	46	GC0XP070290	1.15097	https://www.genecards.org/cgi-bin/carddisp.pl?gene=KIF4A
PSMD1	Proteasome 26S Subunit, Non-ATPase 1	Protein Coding	46	GC02P231056	1.15097	https://www.genecards.org/cgi-bin/carddisp.pl?gene=PSMD1
CCL22	C-C Motif Chemokine Ligand 22	Protein Coding	44	GC16P057359	1.15097	https://www.genecards.org/cgi-bin/carddisp.pl?gene=CCL22
CKS2	CDC28 Protein Kinase Regulatory Subunit 2	Protein Coding	44	GC09P089311	1.15097	https://www.genecards.org/cgi-bin/carddisp.pl?gene=CKS2
FOXD1	Forkhead Box D1	Protein Coding	42	GC05M073444	1.15097	https://www.genecards.org/cgi-bin/carddisp.pl?gene=FOXD1
CASC11	Cancer Susceptibility 11	RNA Gene	18	GC08M132546	1.15097	https://www.genecards.org/cgi-bin/carddisp.pl?gene=CASC11
APOC3	Apolipoprotein C3	Protein Coding	52	GC11P116829	1.14239	https://www.genecards.org/cgi-bin/carddisp.pl?gene=APOC3
GRIN2B	Glutamate Ionotropic Receptor NMDA Type Subunit 2B	Protein Coding	59	GC12M013437	1.14014	https://www.genecards.org/cgi-bin/carddisp.pl?gene=GRIN2B
PDE3A	Phosphodiesterase 3A	Protein Coding	56	GC12P023897	1.14014	https://www.genecards.org/cgi-bin/carddisp.pl?gene=PDE3A
MYT1L	Myelin Transcription Factor 1 Like	Protein Coding	49	GC02M001789	1.14014	https://www.genecards.org/cgi-bin/carddisp.pl?gene=MYT1L
TFF2	Trefoil Factor 2	Protein Coding	48	GC21M042346	1.14014	https://www.genecards.org/cgi-bin/carddisp.pl?gene=TFF2
GLDN	Gliomedin	Protein Coding	47	GC15P051341	1.14014	https://www.genecards.org/cgi-bin/carddisp.pl?gene=GLDN
IFT140	Intraflagellar Transport 140	Protein Coding	47	GC16M008064	1.14014	https://www.genecards.org/cgi-bin/carddisp.pl?gene=IFT140
ADAP1	ArfGAP With Dual PH Domains 1	Protein Coding	46	GC07M000897	1.14014	https://www.genecards.org/cgi-bin/carddisp.pl?gene=ADAP1
ARHGAP17	Rho GTPase Activating Protein 17	Protein Coding	46	GC16M024931	1.14014	https://www.genecards.org/cgi-bin/carddisp.pl?gene=ARHGAP17
TELO2	Telomere Maintenance 2	Protein Coding	46	GC16P001493	1.14014	https://www.genecards.org/cgi-bin/carddisp.pl?gene=TELO2
AEBP2	AE Binding Protein 2	Protein Coding	44	GC12P019404	1.14014	https://www.genecards.org/cgi-bin/carddisp.pl?gene=AEBP2
G2E3	G2/M-Phase Specific E3 Ubiquitin Protein Ligase	Protein Coding	44	GC14P030559	1.14014	https://www.genecards.org/cgi-bin/carddisp.pl?gene=G2E3
DOK6	Docking Protein 6	Protein Coding	43	GC18P069401	1.14014	https://www.genecards.org/cgi-bin/carddisp.pl?gene=DOK6
TENM4	Teneurin Transmembrane Protein 4	Protein Coding	41	GC11M078652	1.14014	https://www.genecards.org/cgi-bin/carddisp.pl?gene=TENM4
TMEM204	Transmembrane Protein 204	Protein Coding	41	GC16P001528	1.14014	https://www.genecards.org/cgi-bin/carddisp.pl?gene=TMEM204
CCDC102B	Coiled-Coil Domain Containing 102B	Protein Coding	39	GC18P068716	1.14014	https://www.genecards.org/cgi-bin/carddisp.pl?gene=CCDC102B
COX19	Cytochrome C Oxidase Assembly Factor COX19	Protein Coding	39	GC07M000898	1.14014	https://www.genecards.org/cgi-bin/carddisp.pl?gene=COX19
EME2	Essential Meiotic Structure-Specific Endonuclease Subunit 2	Protein Coding	39	GC16P013499	1.14014	https://www.genecards.org/cgi-bin/carddisp.pl?gene=EME2
JPT2	Jupiter Microtubule Associated Homolog 2	Protein Coding	38	GC16P013492	1.14014	https://www.genecards.org/cgi-bin/carddisp.pl?gene=JPT2
LRRC31	Leucine Rich Repeat Containing 31	Protein Coding	38	GC03M169839	1.14014	https://www.genecards.org/cgi-bin/carddisp.pl?gene=LRRC31
SFMBT2	Scm Like With Four Mbt Domains 2	Protein Coding	38	GC10M007199	1.14014	https://www.genecards.org/cgi-bin/carddisp.pl?gene=SFMBT2
CRAMP1	Cramped Chromatin Regulator Homolog 1	Protein Coding	37	GC16P013483	1.14014	https://www.genecards.org/cgi-bin/carddisp.pl?gene=CRAMP1
CCDC154	Coiled-Coil Domain Containing 154	Protein Coding	35	GC16M001434	1.14014	https://www.genecards.org/cgi-bin/carddisp.pl?gene=CCDC154
PTX4	Pentraxin 4	Protein Coding	35	GC16M001485	1.14014	https://www.genecards.org/cgi-bin/carddisp.pl?gene=PTX4
KRTAP19-5	Keratin Associated Protein 19-5	Protein Coding	30	GC21M030502	1.14014	https://www.genecards.org/cgi-bin/carddisp.pl?gene=KRTAP19-5
KRTAP19-4	Keratin Associated Protein 19-4	Protein Coding	28	GC21M030496	1.14014	https://www.genecards.org/cgi-bin/carddisp.pl?gene=KRTAP19-4
LINC00504	Long Intergenic Non-Protein Coding RNA 504	RNA Gene	19	GC04M014472	1.14014	https://www.genecards.org/cgi-bin/carddisp.pl?gene=LINC00504
LINC01250	Long Intergenic Non-Protein Coding RNA 1250	RNA Gene	16	GC02M002877	1.14014	https://www.genecards.org/cgi-bin/carddisp.pl?gene=LINC01250
LINC02175	Long Intergenic Non-Protein Coding RNA 2175	RNA Gene	16	GC16P028304	1.14014	https://www.genecards.org/cgi-bin/carddisp.pl?gene=LINC02175
LINC00445	Long Intergenic Non-Protein Coding RNA 445	RNA Gene	15	GC13P035697	1.14014	https://www.genecards.org/cgi-bin/carddisp.pl?gene=LINC00445
LINC02398	Long Intergenic Non-Protein Coding RNA 2398	RNA Gene	13	GC12P023890	1.14014	https://www.genecards.org/cgi-bin/carddisp.pl?gene=LINC02398
LINC02645	Long Intergenic Non-Protein Coding RNA 2645	RNA Gene	13	GC10M002361	1.14014	https://www.genecards.org/cgi-bin/carddisp.pl?gene=LINC02645
ENSG00000260051	Novel Transcript, Antisense To CLCN7	RNA Gene	10	GC16P001451	1.14014	https://www.genecards.org/cgi-bin/carddisp.pl?gene=ENSG00000260051
ENSG00000261505	Novel Transcript, Antisense To UBE2I	RNA Gene	10	GC16M001317	1.14014	https://www.genecards.org/cgi-bin/carddisp.pl?gene=ENSG00000261505
LINC02780	Long Intergenic Non-Protein Coding RNA 2780	RNA Gene	10	GC01P004461	1.14014	https://www.genecards.org/cgi-bin/carddisp.pl?gene=LINC02780
COX6CP17	Cytochrome C Oxidase Subunit 6C Pseudogene 17	Pseudogene	9	GC10M007295	1.14014	https://www.genecards.org/cgi-bin/carddisp.pl?gene=COX6CP17
ENSG00000226890	Novel Transcript, Antisense To CRAMP1L	RNA Gene	9	GC16M001625	1.14014	https://www.genecards.org/cgi-bin/carddisp.pl?gene=ENSG00000226890
SNORD129	Small Nucleolar RNA, C/D Box 129	RNA Gene	9	GC10M007197	1.14014	https://www.genecards.org/cgi-bin/carddisp.pl?gene=SNORD129
RNU1-146P	RNA, U1 Small Nuclear 146, Pseudogene	Pseudogene	8	GC12P019724	1.14014	https://www.genecards.org/cgi-bin/carddisp.pl?gene=RNU1-146P
RNU6-544P	RNA, U6 Small Nuclear 544, Pseudogene	Pseudogene	8	GC11P080527	1.14014	https://www.genecards.org/cgi-bin/carddisp.pl?gene=RNU6-544P
EEF1DP6	Eukaryotic Translation Elongation Factor 1 Delta Pseudogene 6	Pseudogene	7	GC01M004175	1.14014	https://www.genecards.org/cgi-bin/carddisp.pl?gene=EEF1DP6
KRT18P43	Keratin 18 Pseudogene 43	Pseudogene	7	GC03M169902	1.14014	https://www.genecards.org/cgi-bin/carddisp.pl?gene=KRT18P43
LOC107984203	Endogenous Retrovirus Group K Member 6 Env Polyprotein	Protein Coding	7	GC10M006864	1.14014	https://www.genecards.org/cgi-bin/carddisp.pl?gene=LOC107984203
ENSG00000280231	Tec	Uncategorized	5	GC16M008072	1.14014	https://www.genecards.org/cgi-bin/carddisp.pl?gene=ENSG00000280231
HSALNG0133302		RNA Gene	5	GC21P042350	1.14014	https://www.genecards.org/cgi-bin/carddisp.pl?gene=HSALNG0133302
lnc-TFF1-1		RNA Gene	5	GC21M042363	1.14014	https://www.genecards.org/cgi-bin/carddisp.pl?gene=lnc-TFF1-1
piR-35214		RNA Gene	5	GC16M008065	1.14014	https://www.genecards.org/cgi-bin/carddisp.pl?gene=piR-35214
HSALNG0133303		RNA Gene	4	GC21P042366	1.14014	https://www.genecards.org/cgi-bin/carddisp.pl?gene=HSALNG0133303
HSALNG0146711		RNA Gene	4	GC02M212166	1.14014	https://www.genecards.org/cgi-bin/carddisp.pl?gene=HSALNG0146711
LOC105372815	Uncharacterized LOC105372815	RNA Gene	4	GC21P042351	1.14014	https://www.genecards.org/cgi-bin/carddisp.pl?gene=LOC105372815
HSALNG0022000		RNA Gene	3	GC02P212284	1.14014	https://www.genecards.org/cgi-bin/carddisp.pl?gene=HSALNG0022000
HSALNG0132591		RNA Gene	3	GC21P030478	1.14014	https://www.genecards.org/cgi-bin/carddisp.pl?gene=HSALNG0132591
HSALNG0143588		RNA Gene	3	GC12M022903	1.14014	https://www.genecards.org/cgi-bin/carddisp.pl?gene=HSALNG0143588
lnc-PFKP-28		RNA Gene	3	GC10P002489	1.14014	https://www.genecards.org/cgi-bin/carddisp.pl?gene=lnc-PFKP-28
lnc-PTX4-4		RNA Gene	3	GC16M008067	1.14014	https://www.genecards.org/cgi-bin/carddisp.pl?gene=lnc-PTX4-4
RF00003-011		RNA Gene	2	GC12P024736	1.14014	https://www.genecards.org/cgi-bin/carddisp.pl?gene=RF00003-011
UMPS	Uridine Monophosphate Synthetase	Protein Coding	53	GC03P124730	1.12514	https://www.genecards.org/cgi-bin/carddisp.pl?gene=UMPS
CFL1	Cofilin 1	Protein Coding	52	GC11M065823	1.12514	https://www.genecards.org/cgi-bin/carddisp.pl?gene=CFL1
FGFR4	Fibroblast Growth Factor Receptor 4	Protein Coding	59	GC05P177086	1.11891	https://www.genecards.org/cgi-bin/carddisp.pl?gene=FGFR4
FOLH1	Folate Hydrolase 1	Protein Coding	54	GC11M099394	1.11891	https://www.genecards.org/cgi-bin/carddisp.pl?gene=FOLH1
AXIN1	Axin 1	Protein Coding	53	GC16M000287	1.11891	https://www.genecards.org/cgi-bin/carddisp.pl?gene=AXIN1
COL5A2	Collagen Type V Alpha 2 Chain	Protein Coding	51	GC02M189031	1.11891	https://www.genecards.org/cgi-bin/carddisp.pl?gene=COL5A2
FOSL1	FOS Like 1, AP-1 Transcription Factor Subunit	Protein Coding	51	GC11M099737	1.11891	https://www.genecards.org/cgi-bin/carddisp.pl?gene=FOSL1
STMN1	Stathmin 1	Protein Coding	51	GC01M025884	1.11891	https://www.genecards.org/cgi-bin/carddisp.pl?gene=STMN1
SLC15A1	Solute Carrier Family 15 Member 1	Protein Coding	50	GC13M098683	1.11891	https://www.genecards.org/cgi-bin/carddisp.pl?gene=SLC15A1
AKR1B10	Aldo-Keto Reductase Family 1 Member B10	Protein Coding	49	GC07P134527	1.11891	https://www.genecards.org/cgi-bin/carddisp.pl?gene=AKR1B10
GNL3	G Protein Nucleolar 3	Protein Coding	49	GC03P052681	1.11891	https://www.genecards.org/cgi-bin/carddisp.pl?gene=GNL3
WNT7B	Wnt Family Member 7B	Protein Coding	49	GC22M045920	1.11891	https://www.genecards.org/cgi-bin/carddisp.pl?gene=WNT7B
KRT9	Keratin 9	Protein Coding	48	GC17M041565	1.11891	https://www.genecards.org/cgi-bin/carddisp.pl?gene=KRT9
MUC5B	Mucin 5B, Oligomeric Mucus/Gel-Forming	Protein Coding	48	GC11P002133	1.11891	https://www.genecards.org/cgi-bin/carddisp.pl?gene=MUC5B
PSMC4	Proteasome 26S Subunit, ATPase 4	Protein Coding	47	GC19P072849	1.11891	https://www.genecards.org/cgi-bin/carddisp.pl?gene=PSMC4
CCNE2	Cyclin E2	Protein Coding	46	GC08M094879	1.11891	https://www.genecards.org/cgi-bin/carddisp.pl?gene=CCNE2
NID2	Nidogen 2	Protein Coding	46	GC14M052004	1.11891	https://www.genecards.org/cgi-bin/carddisp.pl?gene=NID2
FERMT2	FERM Domain Containing Kindlin 2	Protein Coding	45	GC14M052857	1.11891	https://www.genecards.org/cgi-bin/carddisp.pl?gene=FERMT2
MAGEA4	MAGE Family Member A4	Protein Coding	43	GC0XP151912	1.11891	https://www.genecards.org/cgi-bin/carddisp.pl?gene=MAGEA4
POU4F2	POU Class 4 Homeobox 2	Protein Coding	43	GC04P146638	1.11891	https://www.genecards.org/cgi-bin/carddisp.pl?gene=POU4F2
OIP5	Opa Interacting Protein 5	Protein Coding	40	GC15M041309	1.11891	https://www.genecards.org/cgi-bin/carddisp.pl?gene=OIP5
MAGI2-AS3	MAGI2 Antisense RNA 3	RNA Gene	21	GC07P079452	1.11891	https://www.genecards.org/cgi-bin/carddisp.pl?gene=MAGI2-AS3
CSTP1	Cystatin Pseudogene 1	Pseudogene	12	GC20M023918	1.11891	https://www.genecards.org/cgi-bin/carddisp.pl?gene=CSTP1
APOC2	Apolipoprotein C2	Protein Coding	51	GC19P073058	1.1073	https://www.genecards.org/cgi-bin/carddisp.pl?gene=APOC2
SAA4	Serum Amyloid A4, Constitutive	Protein Coding	45	GC11M018234	1.1073	https://www.genecards.org/cgi-bin/carddisp.pl?gene=SAA4
NEAT1	Nuclear Paraspeckle Assembly Transcript 1	RNA Gene	28	GC11P070859	1.1073	https://www.genecards.org/cgi-bin/carddisp.pl?gene=NEAT1
NAMPT	Nicotinamide Phosphoribosyltransferase	Protein Coding	55	GC07M106248	1.08882	https://www.genecards.org/cgi-bin/carddisp.pl?gene=NAMPT
RBX1	Ring-Box 1	Protein Coding	50	GC22P040951	1.08882	https://www.genecards.org/cgi-bin/carddisp.pl?gene=RBX1
RECK	Reversion Inducing Cysteine Rich Protein With Kazal Motifs	Protein Coding	47	GC09P036036	1.08882	https://www.genecards.org/cgi-bin/carddisp.pl?gene=RECK
EDARADD	EDAR Associated Death Domain	Protein Coding	45	GC01P236348	1.08882	https://www.genecards.org/cgi-bin/carddisp.pl?gene=EDARADD
SQSTM1	Sequestosome 1	Protein Coding	55	GC05P179806	1.08251	https://www.genecards.org/cgi-bin/carddisp.pl?gene=SQSTM1
ITGAL	Integrin Subunit Alpha L	Protein Coding	53	GC16P030472	1.08251	https://www.genecards.org/cgi-bin/carddisp.pl?gene=ITGAL
DHCR24	24-Dehydrocholesterol Reductase	Protein Coding	52	GC01M054849	1.08251	https://www.genecards.org/cgi-bin/carddisp.pl?gene=DHCR24
PLOD1	Procollagen-Lysine,2-Oxoglutarate 5-Dioxygenase 1	Protein Coding	52	GC01P011934	1.08251	https://www.genecards.org/cgi-bin/carddisp.pl?gene=PLOD1
PSMB9	Proteasome 20S Subunit Beta 9	Protein Coding	52	GC06P092185	1.08251	https://www.genecards.org/cgi-bin/carddisp.pl?gene=PSMB9
PAX8	Paired Box 8	Protein Coding	51	GC02M113215	1.08251	https://www.genecards.org/cgi-bin/carddisp.pl?gene=PAX8
PRDX5	Peroxiredoxin 5	Protein Coding	51	GC11P064460	1.08251	https://www.genecards.org/cgi-bin/carddisp.pl?gene=PRDX5
SLC7A11	Solute Carrier Family 7 Member 11	Protein Coding	51	GC04M138164	1.08251	https://www.genecards.org/cgi-bin/carddisp.pl?gene=SLC7A11
ATG7	Autophagy Related 7	Protein Coding	50	GC03P013699	1.08251	https://www.genecards.org/cgi-bin/carddisp.pl?gene=ATG7
CEBPB	CCAAT Enhancer Binding Protein Beta	Protein Coding	50	GC20P050190	1.08251	https://www.genecards.org/cgi-bin/carddisp.pl?gene=CEBPB
ISL1	ISL LIM Homeobox 1	Protein Coding	50	GC05P051383	1.08251	https://www.genecards.org/cgi-bin/carddisp.pl?gene=ISL1
CDH4	Cadherin 4	Protein Coding	49	GC20P061252	1.08251	https://www.genecards.org/cgi-bin/carddisp.pl?gene=CDH4
FABP5	Fatty Acid Binding Protein 5	Protein Coding	49	GC08P081282	1.08251	https://www.genecards.org/cgi-bin/carddisp.pl?gene=FABP5
LASP1	LIM And SH3 Protein 1	Protein Coding	48	GC17P038869	1.08251	https://www.genecards.org/cgi-bin/carddisp.pl?gene=LASP1
PTTG1	PTTG1 Regulator Of Sister Chromatid Separation, Securin	Protein Coding	47	GC05P160422	1.08251	https://www.genecards.org/cgi-bin/carddisp.pl?gene=PTTG1
RBP1	Retinol Binding Protein 1	Protein Coding	47	GC03M139517	1.08251	https://www.genecards.org/cgi-bin/carddisp.pl?gene=RBP1
USP28	Ubiquitin Specific Peptidase 28	Protein Coding	46	GC11M113797	1.08251	https://www.genecards.org/cgi-bin/carddisp.pl?gene=USP28
CCL26	C-C Motif Chemokine Ligand 26	Protein Coding	44	GC07M075769	1.08251	https://www.genecards.org/cgi-bin/carddisp.pl?gene=CCL26
IPO11	Importin 11	Protein Coding	44	GC05P062403	1.08251	https://www.genecards.org/cgi-bin/carddisp.pl?gene=IPO11
RASAL2	RAS Protein Activator Like 2	Protein Coding	44	GC01P178093	1.08251	https://www.genecards.org/cgi-bin/carddisp.pl?gene=RASAL2
ITIH5	Inter-Alpha-Trypsin Inhibitor Heavy Chain 5	Protein Coding	43	GC10M007559	1.08251	https://www.genecards.org/cgi-bin/carddisp.pl?gene=ITIH5
PCAT6	Prostate Cancer Associated Transcript 6	RNA Gene	18	GC01P202810	1.08251	https://www.genecards.org/cgi-bin/carddisp.pl?gene=PCAT6
ITGB3	Integrin Subunit Beta 3	Protein Coding	59	GC17P062247	1.06961	https://www.genecards.org/cgi-bin/carddisp.pl?gene=ITGB3
TGFBR2	Transforming Growth Factor Beta Receptor 2	Protein Coding	59	GC03P030623	1.06961	https://www.genecards.org/cgi-bin/carddisp.pl?gene=TGFBR2
MST1R	Macrophage Stimulating 1 Receptor	Protein Coding	56	GC03M051598	1.06961	https://www.genecards.org/cgi-bin/carddisp.pl?gene=MST1R
FANCL	FA Complementation Group L	Protein Coding	52	GC02M058127	1.06961	https://www.genecards.org/cgi-bin/carddisp.pl?gene=FANCL
USP24	Ubiquitin Specific Peptidase 24	Protein Coding	50	GC01M055066	1.06961	https://www.genecards.org/cgi-bin/carddisp.pl?gene=USP24
GSDMB	Gasdermin B	Protein Coding	40	GC17M039904	1.06961	https://www.genecards.org/cgi-bin/carddisp.pl?gene=GSDMB
MIR138-2	MicroRNA 138-2	RNA Gene	22	GC16P057157	1.06961	https://www.genecards.org/cgi-bin/carddisp.pl?gene=MIR138-2
LINC00460	Long Intergenic Non-Protein Coding RNA 460	RNA Gene	19	GC13P106376	1.06961	https://www.genecards.org/cgi-bin/carddisp.pl?gene=LINC00460
MIR320C1	MicroRNA 320c-1	RNA Gene	18	GC18P021683	1.06961	https://www.genecards.org/cgi-bin/carddisp.pl?gene=MIR320C1
TRAP1	TNF Receptor Associated Protein 1	Protein Coding	51	GC16M008256	1.06112	https://www.genecards.org/cgi-bin/carddisp.pl?gene=TRAP1
NECTIN4	Nectin Cell Adhesion Molecule 4	Protein Coding	52	GC01M161071	1.04957	https://www.genecards.org/cgi-bin/carddisp.pl?gene=NECTIN4
SRD5A2	Steroid 5 Alpha-Reductase 2	Protein Coding	49	GC02M031522	1.04957	https://www.genecards.org/cgi-bin/carddisp.pl?gene=SRD5A2
PA2G4	Proliferation-Associated 2G4	Protein Coding	48	GC12P057487	1.04957	https://www.genecards.org/cgi-bin/carddisp.pl?gene=PA2G4
TPX2	TPX2 Microtubule Nucleation Factor	Protein Coding	48	GC20P031739	1.04957	https://www.genecards.org/cgi-bin/carddisp.pl?gene=TPX2
SMC2	Structural Maintenance Of Chromosomes 2	Protein Coding	47	GC09P104094	1.04957	https://www.genecards.org/cgi-bin/carddisp.pl?gene=SMC2
ZBTB38	Zinc Finger And BTB Domain Containing 38	Protein Coding	43	GC03P141324	1.04957	https://www.genecards.org/cgi-bin/carddisp.pl?gene=ZBTB38
ZNFX1	Zinc Finger NFX1-Type Containing 1	Protein Coding	43	GC20M049244	1.04957	https://www.genecards.org/cgi-bin/carddisp.pl?gene=ZNFX1
MIR377	MicroRNA 377	RNA Gene	21	GC14P110913	1.04957	https://www.genecards.org/cgi-bin/carddisp.pl?gene=MIR377
MIR320C2	MicroRNA 320c-2	RNA Gene	15	GC18P024321	1.04957	https://www.genecards.org/cgi-bin/carddisp.pl?gene=MIR320C2
ACE	Angiotensin I Converting Enzyme	Protein Coding	59	GC17P063477	1.03934	https://www.genecards.org/cgi-bin/carddisp.pl?gene=ACE
BCHE	Butyrylcholinesterase	Protein Coding	57	GC03M165772	1.03934	https://www.genecards.org/cgi-bin/carddisp.pl?gene=BCHE
IL2RA	Interleukin 2 Receptor Subunit Alpha	Protein Coding	57	GC10M006010	1.03934	https://www.genecards.org/cgi-bin/carddisp.pl?gene=IL2RA
ENO1	Enolase 1	Protein Coding	54	GC01M008861	1.03934	https://www.genecards.org/cgi-bin/carddisp.pl?gene=ENO1
NGFR	Nerve Growth Factor Receptor	Protein Coding	54	GC17P049495	1.03934	https://www.genecards.org/cgi-bin/carddisp.pl?gene=NGFR
NRP1	Neuropilin 1	Protein Coding	54	GC10M033177	1.03934	https://www.genecards.org/cgi-bin/carddisp.pl?gene=NRP1
GNB3	G Protein Subunit Beta 3	Protein Coding	53	GC12P006839	1.03934	https://www.genecards.org/cgi-bin/carddisp.pl?gene=GNB3
AKR1C2	Aldo-Keto Reductase Family 1 Member C2	Protein Coding	52	GC10M004987	1.03934	https://www.genecards.org/cgi-bin/carddisp.pl?gene=AKR1C2
RAC3	Rac Family Small GTPase 3	Protein Coding	51	GC17P082031	1.03934	https://www.genecards.org/cgi-bin/carddisp.pl?gene=RAC3
VANGL1	VANGL Planar Cell Polarity Protein 1	Protein Coding	49	GC01P115641	1.03934	https://www.genecards.org/cgi-bin/carddisp.pl?gene=VANGL1
KLK13	Kallikrein Related Peptidase 13	Protein Coding	46	GC19M070997	1.03934	https://www.genecards.org/cgi-bin/carddisp.pl?gene=KLK13
MUC20	Mucin 20, Cell Surface Associated	Protein Coding	45	GC03P195720	1.03934	https://www.genecards.org/cgi-bin/carddisp.pl?gene=MUC20
DLX6-AS1	DLX6 Antisense RNA 1	RNA Gene	25	GC07M096979	1.03934	https://www.genecards.org/cgi-bin/carddisp.pl?gene=DLX6-AS1
MIR125B2	MicroRNA 125b-2	RNA Gene	23	GC21P016590	1.03934	https://www.genecards.org/cgi-bin/carddisp.pl?gene=MIR125B2
MIR22	MicroRNA 22	RNA Gene	23	GC17M001713	1.03934	https://www.genecards.org/cgi-bin/carddisp.pl?gene=MIR22
MIR34B	MicroRNA 34b	RNA Gene	23	GC11P111982	1.03934	https://www.genecards.org/cgi-bin/carddisp.pl?gene=MIR34B
SNHG1	Small Nucleolar RNA Host Gene 1	RNA Gene	23	GC11M099597	1.03934	https://www.genecards.org/cgi-bin/carddisp.pl?gene=SNHG1
MIR154	MicroRNA 154	RNA Gene	22	GC14P110899	1.03934	https://www.genecards.org/cgi-bin/carddisp.pl?gene=MIR154
MIR323A	MicroRNA 323a	RNA Gene	19	GC14P110903	1.03934	https://www.genecards.org/cgi-bin/carddisp.pl?gene=MIR323A
OXCT1-AS1	OXCT1 Antisense RNA 1	RNA Gene	18	GC05P041876	1.03934	https://www.genecards.org/cgi-bin/carddisp.pl?gene=OXCT1-AS1
MYLK	Myosin Light Chain Kinase	Protein Coding	57	GC03M123610	1.02861	https://www.genecards.org/cgi-bin/carddisp.pl?gene=MYLK
THBD	Thrombomodulin	Protein Coding	53	GC20M023026	1.02861	https://www.genecards.org/cgi-bin/carddisp.pl?gene=THBD
AGL	Amylo-Alpha-1, 6-Glucosidase, 4-Alpha-Glucanotransferase	Protein Coding	52	GC01P099850	1.02861	https://www.genecards.org/cgi-bin/carddisp.pl?gene=AGL
SFN	Stratifin	Protein Coding	52	GC01P028391	1.02861	https://www.genecards.org/cgi-bin/carddisp.pl?gene=SFN
CPT1B	Carnitine Palmitoyltransferase 1B	Protein Coding	51	GC22M061624	1.02861	https://www.genecards.org/cgi-bin/carddisp.pl?gene=CPT1B
FBLN1	Fibulin 1	Protein Coding	51	GC22P045502	1.02861	https://www.genecards.org/cgi-bin/carddisp.pl?gene=FBLN1
GPNMB	Glycoprotein Nmb	Protein Coding	51	GC07P023238	1.02861	https://www.genecards.org/cgi-bin/carddisp.pl?gene=GPNMB
KIF23	Kinesin Family Member 23	Protein Coding	51	GC15P069414	1.02861	https://www.genecards.org/cgi-bin/carddisp.pl?gene=KIF23
MMP15	Matrix Metallopeptidase 15	Protein Coding	51	GC16P058025	1.02861	https://www.genecards.org/cgi-bin/carddisp.pl?gene=MMP15
TRAF4	TNF Receptor Associated Factor 4	Protein Coding	49	GC17P061336	1.02861	https://www.genecards.org/cgi-bin/carddisp.pl?gene=TRAF4
HOXB13	Homeobox B13	Protein Coding	48	GC17M052151	1.02861	https://www.genecards.org/cgi-bin/carddisp.pl?gene=HOXB13
IGF2BP3	Insulin Like Growth Factor 2 MRNA Binding Protein 3	Protein Coding	48	GC07M023354	1.02861	https://www.genecards.org/cgi-bin/carddisp.pl?gene=IGF2BP3
AS3MT	Arsenite Methyltransferase	Protein Coding	47	GC10P102869	1.02861	https://www.genecards.org/cgi-bin/carddisp.pl?gene=AS3MT
ARPC4	Actin Related Protein 2/3 Complex Subunit 4	Protein Coding	46	GC03P009792	1.02861	https://www.genecards.org/cgi-bin/carddisp.pl?gene=ARPC4
TAGLN2	Transgelin 2	Protein Coding	46	GC01M159918	1.02861	https://www.genecards.org/cgi-bin/carddisp.pl?gene=TAGLN2
ALYREF	Aly/REF Export Factor	Protein Coding	44	GC17M081887	1.02861	https://www.genecards.org/cgi-bin/carddisp.pl?gene=ALYREF
CRTAC1	Cartilage Acidic Protein 1	Protein Coding	43	GC10M097865	1.02861	https://www.genecards.org/cgi-bin/carddisp.pl?gene=CRTAC1
TRIM26	Tripartite Motif Containing 26	Protein Coding	43	GC06M030184	1.02861	https://www.genecards.org/cgi-bin/carddisp.pl?gene=TRIM26
TCF21	Transcription Factor 21	Protein Coding	42	GC06P133889	1.02861	https://www.genecards.org/cgi-bin/carddisp.pl?gene=TCF21
GGN	Gametogenetin	Protein Coding	39	GC19M070549	1.02861	https://www.genecards.org/cgi-bin/carddisp.pl?gene=GGN
DANCR	Differentiation Antagonizing Non-Protein Coding RNA	RNA Gene	27	GC04P052712	1.02861	https://www.genecards.org/cgi-bin/carddisp.pl?gene=DANCR
HOXA-AS2	HOXA Cluster Antisense RNA 2	RNA Gene	21	GC07P027107	1.02861	https://www.genecards.org/cgi-bin/carddisp.pl?gene=HOXA-AS2
MIR379	MicroRNA 379	RNA Gene	20	GC14P110914	1.02861	https://www.genecards.org/cgi-bin/carddisp.pl?gene=MIR379
MIR612	MicroRNA 612	RNA Gene	19	GC11P070865	1.02861	https://www.genecards.org/cgi-bin/carddisp.pl?gene=MIR612
MIR504	MicroRNA 504	RNA Gene	18	GC0XM138667	1.02861	https://www.genecards.org/cgi-bin/carddisp.pl?gene=MIR504
ROR1-AS1	ROR1 Antisense RNA 1	RNA Gene	17	GC01M064094	1.02861	https://www.genecards.org/cgi-bin/carddisp.pl?gene=ROR1-AS1
PRKACA	Protein Kinase CAMP-Activated Catalytic Subunit Alpha	Protein Coding	59	GC19M014672	1.00657	https://www.genecards.org/cgi-bin/carddisp.pl?gene=PRKACA
IFNAR1	Interferon Alpha And Beta Receptor Subunit 1	Protein Coding	55	GC21P033324	1.00657	https://www.genecards.org/cgi-bin/carddisp.pl?gene=IFNAR1
ABL2	ABL Proto-Oncogene 2, Non-Receptor Tyrosine Kinase	Protein Coding	52	GC01M179143	1.00657	https://www.genecards.org/cgi-bin/carddisp.pl?gene=ABL2
NDRG1	N-Myc Downstream Regulated 1	Protein Coding	52	GC08M133237	1.00657	https://www.genecards.org/cgi-bin/carddisp.pl?gene=NDRG1
OSMR	Oncostatin M Receptor	Protein Coding	52	GC05P038845	1.00657	https://www.genecards.org/cgi-bin/carddisp.pl?gene=OSMR
DROSHA	Drosha Ribonuclease III	Protein Coding	51	GC05M031401	1.00657	https://www.genecards.org/cgi-bin/carddisp.pl?gene=DROSHA
RALBP1	RalA Binding Protein 1	Protein Coding	51	GC18P009465	1.00657	https://www.genecards.org/cgi-bin/carddisp.pl?gene=RALBP1
ID2	Inhibitor Of DNA Binding 2	Protein Coding	50	GC02P008678	1.00657	https://www.genecards.org/cgi-bin/carddisp.pl?gene=ID2
PKP2	Plakophilin 2	Protein Coding	50	GC12M032790	1.00657	https://www.genecards.org/cgi-bin/carddisp.pl?gene=PKP2
HIPK3	Homeodomain Interacting Protein Kinase 3	Protein Coding	49	GC11P033326	1.00657	https://www.genecards.org/cgi-bin/carddisp.pl?gene=HIPK3
LMNB2	Lamin B2	Protein Coding	49	GC19M006779	1.00657	https://www.genecards.org/cgi-bin/carddisp.pl?gene=LMNB2
LTB4R2	Leukotriene B4 Receptor 2	Protein Coding	49	GC14P034699	1.00657	https://www.genecards.org/cgi-bin/carddisp.pl?gene=LTB4R2
PADI2	Peptidyl Arginine Deiminase 2	Protein Coding	49	GC01M017066	1.00657	https://www.genecards.org/cgi-bin/carddisp.pl?gene=PADI2
CCL21	C-C Motif Chemokine Ligand 21	Protein Coding	48	GC09M034709	1.00657	https://www.genecards.org/cgi-bin/carddisp.pl?gene=CCL21
FOXO4	Forkhead Box O4	Protein Coding	48	GC0XP071095	1.00657	https://www.genecards.org/cgi-bin/carddisp.pl?gene=FOXO4
ME1	Malic Enzyme 1	Protein Coding	48	GC06M083210	1.00657	https://www.genecards.org/cgi-bin/carddisp.pl?gene=ME1
GDF9	Growth Differentiation Factor 9	Protein Coding	47	GC05M132861	1.00657	https://www.genecards.org/cgi-bin/carddisp.pl?gene=GDF9
LPXN	Leupaxin	Protein Coding	47	GC11M099445	1.00657	https://www.genecards.org/cgi-bin/carddisp.pl?gene=LPXN
MAP4	Microtubule Associated Protein 4	Protein Coding	47	GC03M047850	1.00657	https://www.genecards.org/cgi-bin/carddisp.pl?gene=MAP4
PCMT1	Protein-L-Isoaspartate (D-Aspartate) O-Methyltransferase	Protein Coding	46	GC06P149749	1.00657	https://www.genecards.org/cgi-bin/carddisp.pl?gene=PCMT1
REG1A	Regenerating Family Member 1 Alpha	Protein Coding	46	GC02P079120	1.00657	https://www.genecards.org/cgi-bin/carddisp.pl?gene=REG1A
FUT4	Fucosyltransferase 4	Protein Coding	44	GC11P094544	1.00657	https://www.genecards.org/cgi-bin/carddisp.pl?gene=FUT4
IL27	Interleukin 27	Protein Coding	44	GC16M038243	1.00657	https://www.genecards.org/cgi-bin/carddisp.pl?gene=IL27
MAML2	Mastermind Like Transcriptional Coactivator 2	Protein Coding	44	GC11M095976	1.00657	https://www.genecards.org/cgi-bin/carddisp.pl?gene=MAML2
KNTC1	Kinetochore Associated 1	Protein Coding	42	GC12P122527	1.00657	https://www.genecards.org/cgi-bin/carddisp.pl?gene=KNTC1
LMTK3	Lemur Tyrosine Kinase 3	Protein Coding	42	GC19M048485	1.00657	https://www.genecards.org/cgi-bin/carddisp.pl?gene=LMTK3
NKD2	NKD Inhibitor Of WNT Signaling Pathway 2	Protein Coding	41	GC05P001008	1.00657	https://www.genecards.org/cgi-bin/carddisp.pl?gene=NKD2
ALPK2	Alpha Kinase 2	Protein Coding	40	GC18M058481	1.00657	https://www.genecards.org/cgi-bin/carddisp.pl?gene=ALPK2
CERCAM	Cerebral Endothelial Cell Adhesion Molecule	Protein Coding	40	GC09P128411	1.00657	https://www.genecards.org/cgi-bin/carddisp.pl?gene=CERCAM
RAB6C	RAB6C, Member RAS Oncogene Family	Protein Coding	38	GC02P129979	1.00657	https://www.genecards.org/cgi-bin/carddisp.pl?gene=RAB6C
ZSCAN16	Zinc Finger And SCAN Domain Containing 16	Protein Coding	37	GC06P092031	1.00657	https://www.genecards.org/cgi-bin/carddisp.pl?gene=ZSCAN16
KCNQ1OT1	KCNQ1 Opposite Strand/Antisense Transcript 1	RNA Gene	30	GC11M004526	1.00657	https://www.genecards.org/cgi-bin/carddisp.pl?gene=KCNQ1OT1
MIR148B	MicroRNA 148b	RNA Gene	23	GC12P054337	1.00657	https://www.genecards.org/cgi-bin/carddisp.pl?gene=MIR148B
MIR374A	MicroRNA 374a	RNA Gene	20	GC0XM074300	1.00657	https://www.genecards.org/cgi-bin/carddisp.pl?gene=MIR374A
LINC00641	Long Intergenic Non-Protein Coding RNA 641	RNA Gene	17	GC14M023655	1.00657	https://www.genecards.org/cgi-bin/carddisp.pl?gene=LINC00641
OPRM1	Opioid Receptor Mu 1	Protein Coding	55	GC06P154123	1.00557	https://www.genecards.org/cgi-bin/carddisp.pl?gene=OPRM1
VPS26A	VPS26 Retromer Complex Component A	Protein Coding	46	GC10P069123	1.00557	https://www.genecards.org/cgi-bin/carddisp.pl?gene=VPS26A
WDFY4	WDFY Family Member 4	Protein Coding	41	GC10P048684	1.00557	https://www.genecards.org/cgi-bin/carddisp.pl?gene=WDFY4
TTC6	Tetratricopeptide Repeat Domain 6	Protein Coding	34	GC14P037595	1.00557	https://www.genecards.org/cgi-bin/carddisp.pl?gene=TTC6
GATA3-AS1	GATA3 Antisense RNA 1	RNA Gene	19	GC10M008016	1.00557	https://www.genecards.org/cgi-bin/carddisp.pl?gene=GATA3-AS1
AKT2	AKT Serine/Threonine Kinase 2	Protein Coding	61	GC19M040230	0.983267	https://www.genecards.org/cgi-bin/carddisp.pl?gene=AKT2
CD40LG	CD40 Ligand	Protein Coding	57	GC0XP136649	0.983267	https://www.genecards.org/cgi-bin/carddisp.pl?gene=CD40LG
CD27	CD27 Molecule	Protein Coding	54	GC12P023523	0.983267	https://www.genecards.org/cgi-bin/carddisp.pl?gene=CD27
CRKL	CRK Like Proto-Oncogene, Adaptor Protein	Protein Coding	53	GC22P020917	0.983267	https://www.genecards.org/cgi-bin/carddisp.pl?gene=CRKL
LIFR	LIF Receptor Subunit Alpha	Protein Coding	53	GC05M038475	0.983267	https://www.genecards.org/cgi-bin/carddisp.pl?gene=LIFR
CDC6	Cell Division Cycle 6	Protein Coding	52	GC17P040287	0.983267	https://www.genecards.org/cgi-bin/carddisp.pl?gene=CDC6
F3	Coagulation Factor III, Tissue Factor	Protein Coding	52	GC01M094610	0.983267	https://www.genecards.org/cgi-bin/carddisp.pl?gene=F3
HAVCR2	Hepatitis A Virus Cellular Receptor 2	Protein Coding	52	GC05M157063	0.983267	https://www.genecards.org/cgi-bin/carddisp.pl?gene=HAVCR2
BMX	BMX Non-Receptor Tyrosine Kinase	Protein Coding	51	GC0XP015392	0.983267	https://www.genecards.org/cgi-bin/carddisp.pl?gene=BMX
FGF9	Fibroblast Growth Factor 9	Protein Coding	51	GC13P021671	0.983267	https://www.genecards.org/cgi-bin/carddisp.pl?gene=FGF9
KIF22	Kinesin Family Member 22	Protein Coding	51	GC16P042735	0.983267	https://www.genecards.org/cgi-bin/carddisp.pl?gene=KIF22
RHOB	Ras Homolog Family Member B	Protein Coding	51	GC02P020447	0.983267	https://www.genecards.org/cgi-bin/carddisp.pl?gene=RHOB
ROBO4	Roundabout Guidance Receptor 4	Protein Coding	51	GC11M124883	0.983267	https://www.genecards.org/cgi-bin/carddisp.pl?gene=ROBO4
CHD2	Chromodomain Helicase DNA Binding Protein 2	Protein Coding	50	GC15P124056	0.983267	https://www.genecards.org/cgi-bin/carddisp.pl?gene=CHD2
COX5A	Cytochrome C Oxidase Subunit 5A	Protein Coding	50	GC15M074919	0.983267	https://www.genecards.org/cgi-bin/carddisp.pl?gene=COX5A
EYA4	EYA Transcriptional Coactivator And Phosphatase 4	Protein Coding	50	GC06P133240	0.983267	https://www.genecards.org/cgi-bin/carddisp.pl?gene=EYA4
GRB7	Growth Factor Receptor Bound Protein 7	Protein Coding	50	GC17P061875	0.983267	https://www.genecards.org/cgi-bin/carddisp.pl?gene=GRB7
SHC1	SHC Adaptor Protein 1	Protein Coding	50	GC01M154962	0.983267	https://www.genecards.org/cgi-bin/carddisp.pl?gene=SHC1
SUV39H1	SUV39H1 Histone Lysine Methyltransferase	Protein Coding	50	GC0XP051143	0.983267	https://www.genecards.org/cgi-bin/carddisp.pl?gene=SUV39H1
IL22	Interleukin 22	Protein Coding	49	GC12M068248	0.983267	https://www.genecards.org/cgi-bin/carddisp.pl?gene=IL22
TDGF1	Teratocarcinoma-Derived Growth Factor 1	Protein Coding	49	GC03P047633	0.983267	https://www.genecards.org/cgi-bin/carddisp.pl?gene=TDGF1
HOXA13	Homeobox A13	Protein Coding	48	GC07M027674	0.983267	https://www.genecards.org/cgi-bin/carddisp.pl?gene=HOXA13
MDC1	Mediator Of DNA Damage Checkpoint 1	Protein Coding	48	GC06M071645	0.983267	https://www.genecards.org/cgi-bin/carddisp.pl?gene=MDC1
MT2A	Metallothionein 2A	Protein Coding	48	GC16P057130	0.983267	https://www.genecards.org/cgi-bin/carddisp.pl?gene=MT2A
SMARCA5	SWI/SNF Related, Matrix Associated, Actin Dependent Regulator Of Chromatin, Subfamily A, Member 5	Protein Coding	48	GC04P143513	0.983267	https://www.genecards.org/cgi-bin/carddisp.pl?gene=SMARCA5
ALG3	ALG3 Alpha-1,3- Mannosyltransferase	Protein Coding	47	GC03M184244	0.983267	https://www.genecards.org/cgi-bin/carddisp.pl?gene=ALG3
BCLAF1	BCL2 Associated Transcription Factor 1	Protein Coding	47	GC06M136256	0.983267	https://www.genecards.org/cgi-bin/carddisp.pl?gene=BCLAF1
KDM2A	Lysine Demethylase 2A	Protein Coding	47	GC11P067119	0.983267	https://www.genecards.org/cgi-bin/carddisp.pl?gene=KDM2A
CTCFL	CCCTC-Binding Factor Like	Protein Coding	46	GC20M057495	0.983267	https://www.genecards.org/cgi-bin/carddisp.pl?gene=CTCFL
HYAL4	Hyaluronidase 4	Protein Coding	46	GC07P123795	0.983267	https://www.genecards.org/cgi-bin/carddisp.pl?gene=HYAL4
S100A7	S100 Calcium Binding Protein A7	Protein Coding	46	GC01M153457	0.983267	https://www.genecards.org/cgi-bin/carddisp.pl?gene=S100A7
PDCD6	Programmed Cell Death 6	Protein Coding	45	GC05P000272	0.983267	https://www.genecards.org/cgi-bin/carddisp.pl?gene=PDCD6
GPR87	G Protein-Coupled Receptor 87	Protein Coding	44	GC03M151294	0.983267	https://www.genecards.org/cgi-bin/carddisp.pl?gene=GPR87
KIF15	Kinesin Family Member 15	Protein Coding	44	GC03P047581	0.983267	https://www.genecards.org/cgi-bin/carddisp.pl?gene=KIF15
MT1A	Metallothionein 1A	Protein Coding	44	GC16P056638	0.983267	https://www.genecards.org/cgi-bin/carddisp.pl?gene=MT1A
RBFOX3	RNA Binding Fox-1 Homolog 3	Protein Coding	44	GC17M079089	0.983267	https://www.genecards.org/cgi-bin/carddisp.pl?gene=RBFOX3
KDM7A	Lysine Demethylase 7A	Protein Coding	43	GC07M140084	0.983267	https://www.genecards.org/cgi-bin/carddisp.pl?gene=KDM7A
MT1F	Metallothionein 1F	Protein Coding	43	GC16P056657	0.983267	https://www.genecards.org/cgi-bin/carddisp.pl?gene=MT1F
MT1X	Metallothionein 1X	Protein Coding	43	GC16P057125	0.983267	https://www.genecards.org/cgi-bin/carddisp.pl?gene=MT1X
DEFB4A	Defensin Beta 4A	Protein Coding	42	GC08P007900	0.983267	https://www.genecards.org/cgi-bin/carddisp.pl?gene=DEFB4A
DEPDC1B	DEP Domain Containing 1B	Protein Coding	42	GC05M060596	0.983267	https://www.genecards.org/cgi-bin/carddisp.pl?gene=DEPDC1B
SNX16	Sorting Nexin 16	Protein Coding	42	GC08M081799	0.983267	https://www.genecards.org/cgi-bin/carddisp.pl?gene=SNX16
HASPIN	Histone H3 Associated Protein Kinase	Protein Coding	41	GC17P004570	0.983267	https://www.genecards.org/cgi-bin/carddisp.pl?gene=HASPIN
MT1H	Metallothionein 1H	Protein Coding	40	GC16P057136	0.983267	https://www.genecards.org/cgi-bin/carddisp.pl?gene=MT1H
MARCHF1	Membrane Associated Ring-CH-Type Finger 1	Protein Coding	39	GC04M163525	0.983267	https://www.genecards.org/cgi-bin/carddisp.pl?gene=MARCHF1
MT-CO3	Mitochondrially Encoded Cytochrome C Oxidase III	Protein Coding	35	GCMTP009209	0.983267	https://www.genecards.org/cgi-bin/carddisp.pl?gene=MT-CO3
IQANK1	IQ Motif And Ankyrin Repeat Containing 1	Protein Coding	22	GC08P144564	0.983267	https://www.genecards.org/cgi-bin/carddisp.pl?gene=IQANK1
EGFR-AS1	EGFR Antisense RNA 1	RNA Gene	20	GC07M055179	0.983267	https://www.genecards.org/cgi-bin/carddisp.pl?gene=EGFR-AS1
MIR485	MicroRNA 485	RNA Gene	20	GC14P110923	0.983267	https://www.genecards.org/cgi-bin/carddisp.pl?gene=MIR485
ZNF503-AS1	ZNF503 Antisense RNA 1	RNA Gene	20	GC10P075244	0.983267	https://www.genecards.org/cgi-bin/carddisp.pl?gene=ZNF503-AS1
LINC00511	Long Intergenic Non-Protein Coding RNA 511	RNA Gene	19	GC17M072323	0.983267	https://www.genecards.org/cgi-bin/carddisp.pl?gene=LINC00511
MIR489	MicroRNA 489	RNA Gene	19	GC07M093483	0.983267	https://www.genecards.org/cgi-bin/carddisp.pl?gene=MIR489
MIR653	MicroRNA 653	RNA Gene	19	GC07M093482	0.983267	https://www.genecards.org/cgi-bin/carddisp.pl?gene=MIR653
MIR626	MicroRNA 626	RNA Gene	18	GC15P041691	0.983267	https://www.genecards.org/cgi-bin/carddisp.pl?gene=MIR626
MIR558	MicroRNA 558	RNA Gene	16	GC02P032598	0.983267	https://www.genecards.org/cgi-bin/carddisp.pl?gene=MIR558
MIR1270	MicroRNA 1270	RNA Gene	13	GC19M020399	0.983267	https://www.genecards.org/cgi-bin/carddisp.pl?gene=MIR1270
MIR5195	MicroRNA 5195	RNA Gene	12	GC14M113428	0.983267	https://www.genecards.org/cgi-bin/carddisp.pl?gene=MIR5195
PCBP2-OT1	PCBP2 Overlapping Transcript 1	RNA Gene	12	GC12P053464	0.983267	https://www.genecards.org/cgi-bin/carddisp.pl?gene=PCBP2-OT1
FBP1	Fructose-Bisphosphatase 1	Protein Coding	56	GC09M094603	0.983083	https://www.genecards.org/cgi-bin/carddisp.pl?gene=FBP1
WNT2	Wnt Family Member 2	Protein Coding	50	GC07M117313	0.983083	https://www.genecards.org/cgi-bin/carddisp.pl?gene=WNT2
MIR188	MicroRNA 188	RNA Gene	19	GC0XP050003	0.983083	https://www.genecards.org/cgi-bin/carddisp.pl?gene=MIR188
KDM1A	Lysine Demethylase 1A	Protein Coding	56	GC01P023019	0.958455	https://www.genecards.org/cgi-bin/carddisp.pl?gene=KDM1A
CCND2	Cyclin D2	Protein Coding	55	GC12P023493	0.958455	https://www.genecards.org/cgi-bin/carddisp.pl?gene=CCND2
CHRM3	Cholinergic Receptor Muscarinic 3	Protein Coding	55	GC01P239386	0.958455	https://www.genecards.org/cgi-bin/carddisp.pl?gene=CHRM3
NRG1	Neuregulin 1	Protein Coding	55	GC08P031639	0.958455	https://www.genecards.org/cgi-bin/carddisp.pl?gene=NRG1
PTK2	Protein Tyrosine Kinase 2	Protein Coding	55	GC08M140657	0.958455	https://www.genecards.org/cgi-bin/carddisp.pl?gene=PTK2
MAPK7	Mitogen-Activated Protein Kinase 7	Protein Coding	54	GC17P061131	0.958455	https://www.genecards.org/cgi-bin/carddisp.pl?gene=MAPK7
CDK9	Cyclin Dependent Kinase 9	Protein Coding	53	GC09P128100	0.958455	https://www.genecards.org/cgi-bin/carddisp.pl?gene=CDK9
HSF1	Heat Shock Transcription Factor 1	Protein Coding	53	GC08P144291	0.958455	https://www.genecards.org/cgi-bin/carddisp.pl?gene=HSF1
TGFBR3	Transforming Growth Factor Beta Receptor 3	Protein Coding	53	GC01M091680	0.958455	https://www.genecards.org/cgi-bin/carddisp.pl?gene=TGFBR3
BDKRB2	Bradykinin Receptor B2	Protein Coding	52	GC14P096205	0.958455	https://www.genecards.org/cgi-bin/carddisp.pl?gene=BDKRB2
PFKP	Phosphofructokinase, Platelet	Protein Coding	52	GC10P003066	0.958455	https://www.genecards.org/cgi-bin/carddisp.pl?gene=PFKP
PXN	Paxillin	Protein Coding	52	GC12M120210	0.958455	https://www.genecards.org/cgi-bin/carddisp.pl?gene=PXN
SOCS1	Suppressor Of Cytokine Signaling 1	Protein Coding	52	GC16M012467	0.958455	https://www.genecards.org/cgi-bin/carddisp.pl?gene=SOCS1
WDR5	WD Repeat Domain 5	Protein Coding	52	GC09P134135	0.958455	https://www.genecards.org/cgi-bin/carddisp.pl?gene=WDR5
ADAM15	ADAM Metallopeptidase Domain 15	Protein Coding	51	GC01P155050	0.958455	https://www.genecards.org/cgi-bin/carddisp.pl?gene=ADAM15
GDF2	Growth Differentiation Factor 2	Protein Coding	51	GC10P047322	0.958455	https://www.genecards.org/cgi-bin/carddisp.pl?gene=GDF2
KIF5A	Kinesin Family Member 5A	Protein Coding	51	GC12P057555	0.958455	https://www.genecards.org/cgi-bin/carddisp.pl?gene=KIF5A
PBRM1	Polybromo 1	Protein Coding	51	GC03M052545	0.958455	https://www.genecards.org/cgi-bin/carddisp.pl?gene=PBRM1
BMP6	Bone Morphogenetic Protein 6	Protein Coding	50	GC06P007726	0.958455	https://www.genecards.org/cgi-bin/carddisp.pl?gene=BMP6
CYB5A	Cytochrome B5 Type A	Protein Coding	50	GC18M074250	0.958455	https://www.genecards.org/cgi-bin/carddisp.pl?gene=CYB5A
PPM1B	Protein Phosphatase, Mg2+/Mn2+ Dependent 1B	Protein Coding	50	GC02P044167	0.958455	https://www.genecards.org/cgi-bin/carddisp.pl?gene=PPM1B
PRKAR2B	Protein Kinase CAMP-Dependent Type II Regulatory Subunit Beta	Protein Coding	50	GC07P107044	0.958455	https://www.genecards.org/cgi-bin/carddisp.pl?gene=PRKAR2B
CREB3L1	CAMP Responsive Element Binding Protein 3 Like 1	Protein Coding	49	GC11P046655	0.958455	https://www.genecards.org/cgi-bin/carddisp.pl?gene=CREB3L1
HMGB2	High Mobility Group Box 2	Protein Coding	49	GC04M173331	0.958455	https://www.genecards.org/cgi-bin/carddisp.pl?gene=HMGB2
SPINT2	Serine Peptidase Inhibitor, Kunitz Type 2	Protein Coding	49	GC19P038244	0.958455	https://www.genecards.org/cgi-bin/carddisp.pl?gene=SPINT2
BDKRB1	Bradykinin Receptor B1	Protein Coding	48	GC14P096302	0.958455	https://www.genecards.org/cgi-bin/carddisp.pl?gene=BDKRB1
CAPG	Capping Actin Protein, Gelsolin Like	Protein Coding	48	GC02M085391	0.958455	https://www.genecards.org/cgi-bin/carddisp.pl?gene=CAPG
COP1	COP1 E3 Ubiquitin Ligase	Protein Coding	48	GC01M175944	0.958455	https://www.genecards.org/cgi-bin/carddisp.pl?gene=COP1
CTSV	Cathepsin V	Protein Coding	48	GC09M097029	0.958455	https://www.genecards.org/cgi-bin/carddisp.pl?gene=CTSV
HTR5A	5-Hydroxytryptamine Receptor 5A	Protein Coding	48	GC07P155070	0.958455	https://www.genecards.org/cgi-bin/carddisp.pl?gene=HTR5A
KLF10	KLF Transcription Factor 10	Protein Coding	48	GC08M102648	0.958455	https://www.genecards.org/cgi-bin/carddisp.pl?gene=KLF10
MEIS2	Meis Homeobox 2	Protein Coding	48	GC15M036889	0.958455	https://www.genecards.org/cgi-bin/carddisp.pl?gene=MEIS2
RREB1	Ras Responsive Element Binding Protein 1	Protein Coding	48	GC06P007107	0.958455	https://www.genecards.org/cgi-bin/carddisp.pl?gene=RREB1
SMUG1	Single-Strand-Selective Monofunctional Uracil-DNA Glycosylase 1	Protein Coding	48	GC12M054121	0.958455	https://www.genecards.org/cgi-bin/carddisp.pl?gene=SMUG1
ITGAE	Integrin Subunit Alpha E	Protein Coding	47	GC17M006905	0.958455	https://www.genecards.org/cgi-bin/carddisp.pl?gene=ITGAE
LRP1B	LDL Receptor Related Protein 1B	Protein Coding	47	GC02M140231	0.958455	https://www.genecards.org/cgi-bin/carddisp.pl?gene=LRP1B
NCAPG	Non-SMC Condensin I Complex Subunit G	Protein Coding	47	GC04P019264	0.958455	https://www.genecards.org/cgi-bin/carddisp.pl?gene=NCAPG
VSIR	V-Set Immunoregulatory Receptor	Protein Coding	47	GC10M071748	0.958455	https://www.genecards.org/cgi-bin/carddisp.pl?gene=VSIR
APOBEC3B	Apolipoprotein B MRNA Editing Enzyme Catalytic Subunit 3B	Protein Coding	46	GC22P038982	0.958455	https://www.genecards.org/cgi-bin/carddisp.pl?gene=APOBEC3B
BGLAP	Bone Gamma-Carboxyglutamate Protein	Protein Coding	46	GC01P156242	0.958455	https://www.genecards.org/cgi-bin/carddisp.pl?gene=BGLAP
INSIG1	Insulin Induced Gene 1	Protein Coding	46	GC07P155297	0.958455	https://www.genecards.org/cgi-bin/carddisp.pl?gene=INSIG1
KIF3A	Kinesin Family Member 3A	Protein Coding	46	GC05M132689	0.958455	https://www.genecards.org/cgi-bin/carddisp.pl?gene=KIF3A
MAFF	MAF BZIP Transcription Factor F	Protein Coding	46	GC22P038200	0.958455	https://www.genecards.org/cgi-bin/carddisp.pl?gene=MAFF
P3H2	Prolyl 3-Hydroxylase 2	Protein Coding	46	GC03M189956	0.958455	https://www.genecards.org/cgi-bin/carddisp.pl?gene=P3H2
RALGAPA2	Ral GTPase Activating Protein Catalytic Subunit Alpha 2	Protein Coding	46	GC20M020374	0.958455	https://www.genecards.org/cgi-bin/carddisp.pl?gene=RALGAPA2
DLG5	Discs Large MAGUK Scaffold Protein 5	Protein Coding	45	GC10M077790	0.958455	https://www.genecards.org/cgi-bin/carddisp.pl?gene=DLG5
ESCO1	Establishment Of Sister Chromatid Cohesion N-Acetyltransferase 1	Protein Coding	45	GC18M021529	0.958455	https://www.genecards.org/cgi-bin/carddisp.pl?gene=ESCO1
FMN1	Formin 1	Protein Coding	45	GC15M032765	0.958455	https://www.genecards.org/cgi-bin/carddisp.pl?gene=FMN1
RSPO3	R-Spondin 3	Protein Coding	45	GC06P127118	0.958455	https://www.genecards.org/cgi-bin/carddisp.pl?gene=RSPO3
HOXB5	Homeobox B5	Protein Coding	44	GC17M048591	0.958455	https://www.genecards.org/cgi-bin/carddisp.pl?gene=HOXB5
PAXIP1	PAX Interacting Protein 1	Protein Coding	44	GC07M154943	0.958455	https://www.genecards.org/cgi-bin/carddisp.pl?gene=PAXIP1
TAGAP	T Cell Activation RhoGTPase Activating Protein	Protein Coding	44	GC06M159034	0.958455	https://www.genecards.org/cgi-bin/carddisp.pl?gene=TAGAP
ADGRA1	Adhesion G Protein-Coupled Receptor A1	Protein Coding	42	GC10P133070	0.958455	https://www.genecards.org/cgi-bin/carddisp.pl?gene=ADGRA1
RSPH3	Radial Spoke Head 3	Protein Coding	42	GC06M158962	0.958455	https://www.genecards.org/cgi-bin/carddisp.pl?gene=RSPH3
SKA3	Spindle And Kinetochore Associated Complex Subunit 3	Protein Coding	42	GC13M021153	0.958455	https://www.genecards.org/cgi-bin/carddisp.pl?gene=SKA3
DEDD	Death Effector Domain Containing	Protein Coding	40	GC01M161120	0.958455	https://www.genecards.org/cgi-bin/carddisp.pl?gene=DEDD
IER2	Immediate Early Response 2	Protein Coding	40	GC19P013150	0.958455	https://www.genecards.org/cgi-bin/carddisp.pl?gene=IER2
TTYH3	Tweety Family Member 3	Protein Coding	40	GC07P003479	0.958455	https://www.genecards.org/cgi-bin/carddisp.pl?gene=TTYH3
NUSAP1	Nucleolar And Spindle Associated Protein 1	Protein Coding	39	GC15P046478	0.958455	https://www.genecards.org/cgi-bin/carddisp.pl?gene=NUSAP1
SNHG12	Small Nucleolar RNA Host Gene 12	RNA Gene	27	GC01M028578	0.958455	https://www.genecards.org/cgi-bin/carddisp.pl?gene=SNHG12
PART1	Prostate Androgen-Regulated Transcript 1	RNA Gene	26	GC05P060545	0.958455	https://www.genecards.org/cgi-bin/carddisp.pl?gene=PART1
MIR206	MicroRNA 206	RNA Gene	23	GC06P052144	0.958455	https://www.genecards.org/cgi-bin/carddisp.pl?gene=MIR206
MIR503	MicroRNA 503	RNA Gene	22	GC0XM134699	0.958455	https://www.genecards.org/cgi-bin/carddisp.pl?gene=MIR503
KTN1-AS1	KTN1 Antisense RNA 1	RNA Gene	21	GC14M055578	0.958455	https://www.genecards.org/cgi-bin/carddisp.pl?gene=KTN1-AS1
PCAT19	Prostate Cancer Associated Transcript 19	RNA Gene	19	GC19M072202	0.958455	https://www.genecards.org/cgi-bin/carddisp.pl?gene=PCAT19
LINC-ROR	Long Intergenic Non-Protein Coding RNA, Regulator Of Reprogramming	RNA Gene	18	GC18M057054	0.958455	https://www.genecards.org/cgi-bin/carddisp.pl?gene=LINC-ROR
MIR298	MicroRNA 298	RNA Gene	18	GC20M058818	0.958455	https://www.genecards.org/cgi-bin/carddisp.pl?gene=MIR298
GAS6-DT	GAS6 Divergent Transcript	RNA Gene	17	GC13P113865	0.958455	https://www.genecards.org/cgi-bin/carddisp.pl?gene=GAS6-DT
MIR329-1	MicroRNA 329-1	RNA Gene	17	GC14P110905	0.958455	https://www.genecards.org/cgi-bin/carddisp.pl?gene=MIR329-1
MIR329-2	MicroRNA 329-2	RNA Gene	15	GC14P110906	0.958455	https://www.genecards.org/cgi-bin/carddisp.pl?gene=MIR329-2
MIR3622A	MicroRNA 3622a	RNA Gene	15	GC08P027701	0.958455	https://www.genecards.org/cgi-bin/carddisp.pl?gene=MIR3622A
ATR	ATR Serine/Threonine Kinase	Protein Coding	59	GC03M142449	0.931799	https://www.genecards.org/cgi-bin/carddisp.pl?gene=ATR
NR3C1	Nuclear Receptor Subfamily 3 Group C Member 1	Protein Coding	56	GC05M143277	0.931799	https://www.genecards.org/cgi-bin/carddisp.pl?gene=NR3C1
USP7	Ubiquitin Specific Peptidase 7	Protein Coding	56	GC16M008892	0.931799	https://www.genecards.org/cgi-bin/carddisp.pl?gene=USP7
MCL1	MCL1 Apoptosis Regulator, BCL2 Family Member	Protein Coding	55	GC01M152731	0.931799	https://www.genecards.org/cgi-bin/carddisp.pl?gene=MCL1
SIRT2	Sirtuin 2	Protein Coding	55	GC19M038878	0.931799	https://www.genecards.org/cgi-bin/carddisp.pl?gene=SIRT2
KMT2A	Lysine Methyltransferase 2A	Protein Coding	54	GC11P118436	0.931799	https://www.genecards.org/cgi-bin/carddisp.pl?gene=KMT2A
PPM1D	Protein Phosphatase, Mg2+/Mn2+ Dependent 1D	Protein Coding	54	GC17P060600	0.931799	https://www.genecards.org/cgi-bin/carddisp.pl?gene=PPM1D
CSNK2A2	Casein Kinase 2 Alpha 2	Protein Coding	53	GC16M058157	0.931799	https://www.genecards.org/cgi-bin/carddisp.pl?gene=CSNK2A2
HMOX2	Heme Oxygenase 2	Protein Coding	53	GC16P004474	0.931799	https://www.genecards.org/cgi-bin/carddisp.pl?gene=HMOX2
POLA1	DNA Polymerase Alpha 1, Catalytic Subunit	Protein Coding	53	GC0XP024693	0.931799	https://www.genecards.org/cgi-bin/carddisp.pl?gene=POLA1
YWHAB	Tyrosine 3-Monooxygenase/Tryptophan 5-Monooxygenase Activation Protein Beta	Protein Coding	53	GC20P044885	0.931799	https://www.genecards.org/cgi-bin/carddisp.pl?gene=YWHAB
YWHAH	Tyrosine 3-Monooxygenase/Tryptophan 5-Monooxygenase Activation Protein Eta	Protein Coding	53	GC22P031944	0.931799	https://www.genecards.org/cgi-bin/carddisp.pl?gene=YWHAH
DUSP1	Dual Specificity Phosphatase 1	Protein Coding	52	GC05M172768	0.931799	https://www.genecards.org/cgi-bin/carddisp.pl?gene=DUSP1
ENTPD5	Ectonucleoside Triphosphate Diphosphohydrolase 5 (Inactive)	Protein Coding	52	GC14M073958	0.931799	https://www.genecards.org/cgi-bin/carddisp.pl?gene=ENTPD5
MAT1A	Methionine Adenosyltransferase 1A	Protein Coding	52	GC10M080271	0.931799	https://www.genecards.org/cgi-bin/carddisp.pl?gene=MAT1A
ENTPD3	Ectonucleoside Triphosphate Diphosphohydrolase 3	Protein Coding	51	GC03P040403	0.931799	https://www.genecards.org/cgi-bin/carddisp.pl?gene=ENTPD3
RACGAP1	Rac GTPase Activating Protein 1	Protein Coding	51	GC12M049980	0.931799	https://www.genecards.org/cgi-bin/carddisp.pl?gene=RACGAP1
SPG7	SPG7 Matrix AAA Peptidase Subunit, Paraplegin	Protein Coding	51	GC16P091579	0.931799	https://www.genecards.org/cgi-bin/carddisp.pl?gene=SPG7
TJP1	Tight Junction Protein 1	Protein Coding	51	GC15M029699	0.931799	https://www.genecards.org/cgi-bin/carddisp.pl?gene=TJP1
TRIM24	Tripartite Motif Containing 24	Protein Coding	51	GC07P138460	0.931799	https://www.genecards.org/cgi-bin/carddisp.pl?gene=TRIM24
GADD45A	Growth Arrest And DNA Damage Inducible Alpha	Protein Coding	50	GC01P067685	0.931799	https://www.genecards.org/cgi-bin/carddisp.pl?gene=GADD45A
HAX1	HCLS1 Associated Protein X-1	Protein Coding	50	GC01P154273	0.931799	https://www.genecards.org/cgi-bin/carddisp.pl?gene=HAX1
NMT1	N-Myristoyltransferase 1	Protein Coding	50	GC17P062083	0.931799	https://www.genecards.org/cgi-bin/carddisp.pl?gene=NMT1
SELENBP1	Selenium Binding Protein 1	Protein Coding	50	GC01M151364	0.931799	https://www.genecards.org/cgi-bin/carddisp.pl?gene=SELENBP1
SREBF2	Sterol Regulatory Element Binding Transcription Factor 2	Protein Coding	50	GC22P041833	0.931799	https://www.genecards.org/cgi-bin/carddisp.pl?gene=SREBF2
KAT7	Lysine Acetyltransferase 7	Protein Coding	49	GC17P049788	0.931799	https://www.genecards.org/cgi-bin/carddisp.pl?gene=KAT7
NEDD9	Neural Precursor Cell Expressed, Developmentally Down-Regulated 9	Protein Coding	48	GC06M011183	0.931799	https://www.genecards.org/cgi-bin/carddisp.pl?gene=NEDD9
PYCARD	PYD And CARD Domain Containing	Protein Coding	48	GC16M031201	0.931799	https://www.genecards.org/cgi-bin/carddisp.pl?gene=PYCARD
AK4	Adenylate Kinase 4	Protein Coding	47	GC01P065147	0.931799	https://www.genecards.org/cgi-bin/carddisp.pl?gene=AK4
CCDC6	Coiled-Coil Domain Containing 6	Protein Coding	47	GC10M059788	0.931799	https://www.genecards.org/cgi-bin/carddisp.pl?gene=CCDC6
UNC5A	Unc-5 Netrin Receptor A	Protein Coding	47	GC05P177639	0.931799	https://www.genecards.org/cgi-bin/carddisp.pl?gene=UNC5A
DBN1	Drebrin 1	Protein Coding	46	GC05M177456	0.931799	https://www.genecards.org/cgi-bin/carddisp.pl?gene=DBN1
RGS20	Regulator Of G Protein Signaling 20	Protein Coding	46	GC08P053851	0.931799	https://www.genecards.org/cgi-bin/carddisp.pl?gene=RGS20
GTSE1	G2 And S-Phase Expressed 1	Protein Coding	45	GC22P046296	0.931799	https://www.genecards.org/cgi-bin/carddisp.pl?gene=GTSE1
FOXJ1	Forkhead Box J1	Protein Coding	44	GC17M076136	0.931799	https://www.genecards.org/cgi-bin/carddisp.pl?gene=FOXJ1
DHX35	DEAH-Box Helicase 35	Protein Coding	43	GC20P038963	0.931799	https://www.genecards.org/cgi-bin/carddisp.pl?gene=DHX35
RAP2B	RAP2B, Member Of RAS Oncogene Family	Protein Coding	43	GC03P153162	0.931799	https://www.genecards.org/cgi-bin/carddisp.pl?gene=RAP2B
KPNA5	Karyopherin Subunit Alpha 5	Protein Coding	42	GC06P116681	0.931799	https://www.genecards.org/cgi-bin/carddisp.pl?gene=KPNA5
L1TD1	LINE1 Type Transposase Domain Containing 1	Protein Coding	42	GC01P062194	0.931799	https://www.genecards.org/cgi-bin/carddisp.pl?gene=L1TD1
NOP14	NOP14 Nucleolar Protein	Protein Coding	42	GC04M002939	0.931799	https://www.genecards.org/cgi-bin/carddisp.pl?gene=NOP14
PELI2	Pellino E3 Ubiquitin Protein Ligase Family Member 2	Protein Coding	42	GC14P056117	0.931799	https://www.genecards.org/cgi-bin/carddisp.pl?gene=PELI2
RAB36	RAB36, Member RAS Oncogene Family	Protein Coding	42	GC22P023145	0.931799	https://www.genecards.org/cgi-bin/carddisp.pl?gene=RAB36
RTKN2	Rhotekin 2	Protein Coding	42	GC10M062183	0.931799	https://www.genecards.org/cgi-bin/carddisp.pl?gene=RTKN2
MINDY1	MINDY Lysine 48 Deubiquitinase 1	Protein Coding	41	GC01M152770	0.931799	https://www.genecards.org/cgi-bin/carddisp.pl?gene=MINDY1
SHCBP1	SHC Binding And Spindle Associated 1	Protein Coding	41	GC16M046578	0.931799	https://www.genecards.org/cgi-bin/carddisp.pl?gene=SHCBP1
FEZF2	FEZ Family Zinc Finger 2	Protein Coding	40	GC03M062355	0.931799	https://www.genecards.org/cgi-bin/carddisp.pl?gene=FEZF2
HSDL2	Hydroxysteroid Dehydrogenase Like 2	Protein Coding	40	GC09P112379	0.931799	https://www.genecards.org/cgi-bin/carddisp.pl?gene=HSDL2
SLC35F2	Solute Carrier Family 35 Member F2	Protein Coding	40	GC11M107790	0.931799	https://www.genecards.org/cgi-bin/carddisp.pl?gene=SLC35F2
ZKSCAN3	Zinc Finger With KRAB And SCAN Domains 3	Protein Coding	39	GC06P028349	0.931799	https://www.genecards.org/cgi-bin/carddisp.pl?gene=ZKSCAN3
CCNJ	Cyclin J	Protein Coding	38	GC10P096043	0.931799	https://www.genecards.org/cgi-bin/carddisp.pl?gene=CCNJ
TMEM88	Transmembrane Protein 88	Protein Coding	38	GC17P011748	0.931799	https://www.genecards.org/cgi-bin/carddisp.pl?gene=TMEM88
TEX19	Testis Expressed 19	Protein Coding	34	GC17P082359	0.931799	https://www.genecards.org/cgi-bin/carddisp.pl?gene=TEX19
SOX2-OT	SOX2 Overlapping Transcript	RNA Gene	28	GC03P180989	0.931799	https://www.genecards.org/cgi-bin/carddisp.pl?gene=SOX2-OT
LINC00482	Long Intergenic Non-Protein Coding RNA 482	RNA Gene	26	GC17M081302	0.931799	https://www.genecards.org/cgi-bin/carddisp.pl?gene=LINC00482
RMRP	RNA Component Of Mitochondrial RNA Processing Endoribonuclease	RNA Gene	26	GC09M035655	0.931799	https://www.genecards.org/cgi-bin/carddisp.pl?gene=RMRP
CRNDE	Colorectal Neoplasia Differentially Expressed	RNA Gene	25	GC16M054900	0.931799	https://www.genecards.org/cgi-bin/carddisp.pl?gene=CRNDE
MIR128-2	MicroRNA 128-2	RNA Gene	23	GC03P035754	0.931799	https://www.genecards.org/cgi-bin/carddisp.pl?gene=MIR128-2
MIR302A	MicroRNA 302a	RNA Gene	23	GC04M112792	0.931799	https://www.genecards.org/cgi-bin/carddisp.pl?gene=MIR302A
MIR378A	MicroRNA 378a	RNA Gene	23	GC05P149732	0.931799	https://www.genecards.org/cgi-bin/carddisp.pl?gene=MIR378A
LINC00520	Long Intergenic Non-Protein Coding RNA 520	RNA Gene	21	GC14M055781	0.931799	https://www.genecards.org/cgi-bin/carddisp.pl?gene=LINC00520
MIR128-1	MicroRNA 128-1	RNA Gene	21	GC02P135665	0.931799	https://www.genecards.org/cgi-bin/carddisp.pl?gene=MIR128-1
MIR409	MicroRNA 409	RNA Gene	21	GC14P110919	0.931799	https://www.genecards.org/cgi-bin/carddisp.pl?gene=MIR409
MIR503HG	MIR503 Host Gene	RNA Gene	21	GC0XM134704	0.931799	https://www.genecards.org/cgi-bin/carddisp.pl?gene=MIR503HG
TMEM238L	Transmembrane Protein 238 Like	Protein Coding	20	GC17M011124	0.931799	https://www.genecards.org/cgi-bin/carddisp.pl?gene=TMEM238L
MIR194-1	MicroRNA 194-1	RNA Gene	19	GC01M220118	0.931799	https://www.genecards.org/cgi-bin/carddisp.pl?gene=MIR194-1
LINC00702	Long Intergenic Non-Protein Coding RNA 702	RNA Gene	18	GC10M004201	0.931799	https://www.genecards.org/cgi-bin/carddisp.pl?gene=LINC00702
LINC01140	Long Intergenic Non-Protein Coding RNA 1140	RNA Gene	18	GC01P087129	0.931799	https://www.genecards.org/cgi-bin/carddisp.pl?gene=LINC01140
MIR496	MicroRNA 496	RNA Gene	18	GC14P110930	0.931799	https://www.genecards.org/cgi-bin/carddisp.pl?gene=MIR496
MIR502	MicroRNA 502	RNA Gene	18	GC0XP050014	0.931799	https://www.genecards.org/cgi-bin/carddisp.pl?gene=MIR502
MIR769	MicroRNA 769	RNA Gene	18	GC19P046018	0.931799	https://www.genecards.org/cgi-bin/carddisp.pl?gene=MIR769
MIR940	MicroRNA 940	RNA Gene	18	GC16P002271	0.931799	https://www.genecards.org/cgi-bin/carddisp.pl?gene=MIR940
ELF3-AS1	ELF3 Antisense RNA 1	RNA Gene	17	GC01M202001	0.931799	https://www.genecards.org/cgi-bin/carddisp.pl?gene=ELF3-AS1
LINC02470	Long Intergenic Non-Protein Coding RNA 2470	RNA Gene	17	GC12M022909	0.931799	https://www.genecards.org/cgi-bin/carddisp.pl?gene=LINC02470
LINC00960	Long Intergenic Non-Protein Coding RNA 960	RNA Gene	16	GC03P075672	0.931799	https://www.genecards.org/cgi-bin/carddisp.pl?gene=LINC00960
ANKRD62P1-PARP4P3	ANKRD62P1-PARP4P3 Readthrough, Transcribed Pseudogene	Pseudogene	10	GC22M016698	0.931799	https://www.genecards.org/cgi-bin/carddisp.pl?gene=ANKRD62P1-PARP4P3
PARP4P3	Poly(ADP-Ribose) Polymerase Family Member 4 Pseudogene 3	Pseudogene	9	GC22M016653	0.931799	https://www.genecards.org/cgi-bin/carddisp.pl?gene=PARP4P3
ATG3P1	Autophagy Related 3 Pseudogene 1	Pseudogene	8	GC20M039328	0.931799	https://www.genecards.org/cgi-bin/carddisp.pl?gene=ATG3P1
ADAM10	ADAM Metallopeptidase Domain 10	Protein Coding	60	GC15M058588	0.902811	https://www.genecards.org/cgi-bin/carddisp.pl?gene=ADAM10
PSEN1	Presenilin 1	Protein Coding	60	GC14P073136	0.902811	https://www.genecards.org/cgi-bin/carddisp.pl?gene=PSEN1
EPHB2	EPH Receptor B2	Protein Coding	59	GC01P022710	0.902811	https://www.genecards.org/cgi-bin/carddisp.pl?gene=EPHB2
ADA	Adenosine Deaminase	Protein Coding	57	GC20M044620	0.902811	https://www.genecards.org/cgi-bin/carddisp.pl?gene=ADA
MME	Membrane Metalloendopeptidase	Protein Coding	57	GC03P155024	0.902811	https://www.genecards.org/cgi-bin/carddisp.pl?gene=MME
PRKAA2	Protein Kinase AMP-Activated Catalytic Subunit Alpha 2	Protein Coding	57	GC01P056645	0.902811	https://www.genecards.org/cgi-bin/carddisp.pl?gene=PRKAA2
DNM2	Dynamin 2	Protein Coding	56	GC19P010718	0.902811	https://www.genecards.org/cgi-bin/carddisp.pl?gene=DNM2
EDNRB	Endothelin Receptor Type B	Protein Coding	56	GC13M077895	0.902811	https://www.genecards.org/cgi-bin/carddisp.pl?gene=EDNRB
FZD4	Frizzled Class Receptor 4	Protein Coding	56	GC11M086945	0.902811	https://www.genecards.org/cgi-bin/carddisp.pl?gene=FZD4
KIF11	Kinesin Family Member 11	Protein Coding	56	GC10P092574	0.902811	https://www.genecards.org/cgi-bin/carddisp.pl?gene=KIF11
MYD88	MYD88 Innate Immune Signal Transduction Adaptor	Protein Coding	56	GC03P038152	0.902811	https://www.genecards.org/cgi-bin/carddisp.pl?gene=MYD88
ATF6	Activating Transcription Factor 6	Protein Coding	55	GC01P161766	0.902811	https://www.genecards.org/cgi-bin/carddisp.pl?gene=ATF6
CPS1	Carbamoyl-Phosphate Synthase 1	Protein Coding	55	GC02P210477	0.902811	https://www.genecards.org/cgi-bin/carddisp.pl?gene=CPS1
MAP2K3	Mitogen-Activated Protein Kinase Kinase 3	Protein Coding	55	GC17P061212	0.902811	https://www.genecards.org/cgi-bin/carddisp.pl?gene=MAP2K3
PIK3CB	Phosphatidylinositol-4,5-Bisphosphate 3-Kinase Catalytic Subunit Beta	Protein Coding	55	GC03M138652	0.902811	https://www.genecards.org/cgi-bin/carddisp.pl?gene=PIK3CB
PTK2B	Protein Tyrosine Kinase 2 Beta	Protein Coding	55	GC08P027311	0.902811	https://www.genecards.org/cgi-bin/carddisp.pl?gene=PTK2B
TTK	TTK Protein Kinase	Protein Coding	55	GC06P080003	0.902811	https://www.genecards.org/cgi-bin/carddisp.pl?gene=TTK
FPR1	Formyl Peptide Receptor 1	Protein Coding	54	GC19M051745	0.902811	https://www.genecards.org/cgi-bin/carddisp.pl?gene=FPR1
LOX	Lysyl Oxidase	Protein Coding	54	GC05M122063	0.902811	https://www.genecards.org/cgi-bin/carddisp.pl?gene=LOX
CCN2	Cellular Communication Network Factor 2	Protein Coding	53	GC06M131948	0.902811	https://www.genecards.org/cgi-bin/carddisp.pl?gene=CCN2
EPHB3	EPH Receptor B3	Protein Coding	53	GC03P184561	0.902811	https://www.genecards.org/cgi-bin/carddisp.pl?gene=EPHB3
FYN	FYN Proto-Oncogene, Src Family Tyrosine Kinase	Protein Coding	53	GC06M111660	0.902811	https://www.genecards.org/cgi-bin/carddisp.pl?gene=FYN
MAP2K4	Mitogen-Activated Protein Kinase Kinase 4	Protein Coding	53	GC17P012020	0.902811	https://www.genecards.org/cgi-bin/carddisp.pl?gene=MAP2K4
MAP2K6	Mitogen-Activated Protein Kinase Kinase 6	Protein Coding	53	GC17P069414	0.902811	https://www.genecards.org/cgi-bin/carddisp.pl?gene=MAP2K6
RIT1	Ras Like Without CAAX 1	Protein Coding	53	GC01M155897	0.902811	https://www.genecards.org/cgi-bin/carddisp.pl?gene=RIT1
SETD2	SET Domain Containing 2, Histone Lysine Methyltransferase	Protein Coding	53	GC03M047033	0.902811	https://www.genecards.org/cgi-bin/carddisp.pl?gene=SETD2
TLR9	Toll Like Receptor 9	Protein Coding	53	GC03M052222	0.902811	https://www.genecards.org/cgi-bin/carddisp.pl?gene=TLR9
FKBP4	FKBP Prolyl Isomerase 4	Protein Coding	52	GC12P002795	0.902811	https://www.genecards.org/cgi-bin/carddisp.pl?gene=FKBP4
MAP2K7	Mitogen-Activated Protein Kinase Kinase 7	Protein Coding	52	GC19P007903	0.902811	https://www.genecards.org/cgi-bin/carddisp.pl?gene=MAP2K7
MMP16	Matrix Metallopeptidase 16	Protein Coding	52	GC08M088032	0.902811	https://www.genecards.org/cgi-bin/carddisp.pl?gene=MMP16
NONO	Non-POU Domain Containing Octamer Binding	Protein Coding	52	GC0XP071255	0.902811	https://www.genecards.org/cgi-bin/carddisp.pl?gene=NONO
PAK5	P21 (RAC1) Activated Kinase 5	Protein Coding	52	GC20M009538	0.902811	https://www.genecards.org/cgi-bin/carddisp.pl?gene=PAK5
PPM1A	Protein Phosphatase, Mg2+/Mn2+ Dependent 1A	Protein Coding	52	GC14P060245	0.902811	https://www.genecards.org/cgi-bin/carddisp.pl?gene=PPM1A
SHMT2	Serine Hydroxymethyltransferase 2	Protein Coding	52	GC12P057229	0.902811	https://www.genecards.org/cgi-bin/carddisp.pl?gene=SHMT2
DKK1	Dickkopf WNT Signaling Pathway Inhibitor 1	Protein Coding	51	GC10P052314	0.902811	https://www.genecards.org/cgi-bin/carddisp.pl?gene=DKK1
JAG2	Jagged Canonical Notch Ligand 2	Protein Coding	51	GC14M105140	0.902811	https://www.genecards.org/cgi-bin/carddisp.pl?gene=JAG2
MFAP5	Microfibril Associated Protein 5	Protein Coding	51	GC12M008637	0.902811	https://www.genecards.org/cgi-bin/carddisp.pl?gene=MFAP5
NR1I2	Nuclear Receptor Subfamily 1 Group I Member 2	Protein Coding	51	GC03P119780	0.902811	https://www.genecards.org/cgi-bin/carddisp.pl?gene=NR1I2
AKR1C1	Aldo-Keto Reductase Family 1 Member C1	Protein Coding	50	GC10P004963	0.902811	https://www.genecards.org/cgi-bin/carddisp.pl?gene=AKR1C1
ALCAM	Activated Leukocyte Cell Adhesion Molecule	Protein Coding	50	GC03P105366	0.902811	https://www.genecards.org/cgi-bin/carddisp.pl?gene=ALCAM
DCK	Deoxycytidine Kinase	Protein Coding	50	GC04P070992	0.902811	https://www.genecards.org/cgi-bin/carddisp.pl?gene=DCK
LOXL1	Lysyl Oxidase Like 1	Protein Coding	50	GC15P073925	0.902811	https://www.genecards.org/cgi-bin/carddisp.pl?gene=LOXL1
NOX4	NADPH Oxidase 4	Protein Coding	50	GC11M089324	0.902811	https://www.genecards.org/cgi-bin/carddisp.pl?gene=NOX4
PGF	Placental Growth Factor	Protein Coding	50	GC14M074941	0.902811	https://www.genecards.org/cgi-bin/carddisp.pl?gene=PGF
PPP3CC	Protein Phosphatase 3 Catalytic Subunit Gamma	Protein Coding	50	GC08P022440	0.902811	https://www.genecards.org/cgi-bin/carddisp.pl?gene=PPP3CC
RELB	RELB Proto-Oncogene, NF-KB Subunit	Protein Coding	50	GC19P073059	0.902811	https://www.genecards.org/cgi-bin/carddisp.pl?gene=RELB
CLK3	CDC Like Kinase 3	Protein Coding	49	GC15P074598	0.902811	https://www.genecards.org/cgi-bin/carddisp.pl?gene=CLK3
HEY1	Hes Related Family BHLH Transcription Factor With YRPW Motif 1	Protein Coding	49	GC08M079764	0.902811	https://www.genecards.org/cgi-bin/carddisp.pl?gene=HEY1
GSTO2	Glutathione S-Transferase Omega 2	Protein Coding	48	GC10P104268	0.902811	https://www.genecards.org/cgi-bin/carddisp.pl?gene=GSTO2
LIN28B	Lin-28 Homolog B	Protein Coding	48	GC06P104954	0.902811	https://www.genecards.org/cgi-bin/carddisp.pl?gene=LIN28B
POU2F2	POU Class 2 Homeobox 2	Protein Coding	48	GC19M042086	0.902811	https://www.genecards.org/cgi-bin/carddisp.pl?gene=POU2F2
RNGTT	RNA Guanylyltransferase And 5'-Phosphatase	Protein Coding	48	GC06M088609	0.902811	https://www.genecards.org/cgi-bin/carddisp.pl?gene=RNGTT
OTUB1	OTU Deubiquitinase, Ubiquitin Aldehyde Binding 1	Protein Coding	47	GC11P063985	0.902811	https://www.genecards.org/cgi-bin/carddisp.pl?gene=OTUB1
PLAG1	PLAG1 Zinc Finger	Protein Coding	47	GC08M056383	0.902811	https://www.genecards.org/cgi-bin/carddisp.pl?gene=PLAG1
SIGLEC6	Sialic Acid Binding Ig Like Lectin 6	Protein Coding	47	GC19M051517	0.902811	https://www.genecards.org/cgi-bin/carddisp.pl?gene=SIGLEC6
TK2	Thymidine Kinase 2	Protein Coding	47	GC16M066508	0.902811	https://www.genecards.org/cgi-bin/carddisp.pl?gene=TK2
USP18	Ubiquitin Specific Peptidase 18	Protein Coding	47	GC22P044306	0.902811	https://www.genecards.org/cgi-bin/carddisp.pl?gene=USP18
XK	X-Linked Kx Blood Group Antigen, Kell And VPS13A Binding Protein	Protein Coding	47	GC0XP037685	0.902811	https://www.genecards.org/cgi-bin/carddisp.pl?gene=XK
OTUD5	OTU Deubiquitinase 5	Protein Coding	46	GC0XM048922	0.902811	https://www.genecards.org/cgi-bin/carddisp.pl?gene=OTUD5
GEMIN4	Gem Nuclear Organelle Associated Protein 4	Protein Coding	45	GC17M000744	0.902811	https://www.genecards.org/cgi-bin/carddisp.pl?gene=GEMIN4
SHOX2	Short Stature Homeobox 2	Protein Coding	45	GC03M158095	0.902811	https://www.genecards.org/cgi-bin/carddisp.pl?gene=SHOX2
C1QTNF6	C1q And TNF Related 6	Protein Coding	44	GC22M037180	0.902811	https://www.genecards.org/cgi-bin/carddisp.pl?gene=C1QTNF6
DEFA1	Defensin Alpha 1	Protein Coding	44	GC08M006977	0.902811	https://www.genecards.org/cgi-bin/carddisp.pl?gene=DEFA1
HOXC9	Homeobox C9	Protein Coding	44	GC12P055233	0.902811	https://www.genecards.org/cgi-bin/carddisp.pl?gene=HOXC9
METTL14	Methyltransferase 14, N6-Adenosine-Methyltransferase Subunit	Protein Coding	44	GC04P118685	0.902811	https://www.genecards.org/cgi-bin/carddisp.pl?gene=METTL14
MUC16	Mucin 16, Cell Surface Associated	Protein Coding	44	GC19M008848	0.902811	https://www.genecards.org/cgi-bin/carddisp.pl?gene=MUC16
NRBP1	Nuclear Receptor Binding Protein 1	Protein Coding	44	GC02P027427	0.902811	https://www.genecards.org/cgi-bin/carddisp.pl?gene=NRBP1
BRMS1	BRMS1 Transcriptional Repressor And Anoikis Regulator	Protein Coding	43	GC11M099758	0.902811	https://www.genecards.org/cgi-bin/carddisp.pl?gene=BRMS1
IL31	Interleukin 31	Protein Coding	43	GC12M122496	0.902811	https://www.genecards.org/cgi-bin/carddisp.pl?gene=IL31
PFDN2	Prefoldin Subunit 2	Protein Coding	43	GC01M161100	0.902811	https://www.genecards.org/cgi-bin/carddisp.pl?gene=PFDN2
TLX3	T Cell Leukemia Homeobox 3	Protein Coding	43	GC05P171309	0.902811	https://www.genecards.org/cgi-bin/carddisp.pl?gene=TLX3
DEFA3	Defensin Alpha 3	Protein Coding	42	GC08M007015	0.902811	https://www.genecards.org/cgi-bin/carddisp.pl?gene=DEFA3
URGCP	Upregulator Of Cell Proliferation	Protein Coding	42	GC07M043876	0.902811	https://www.genecards.org/cgi-bin/carddisp.pl?gene=URGCP
CEP128	Centrosomal Protein 128	Protein Coding	41	GC14M080476	0.902811	https://www.genecards.org/cgi-bin/carddisp.pl?gene=CEP128
LAMTOR1	Late Endosomal/Lysosomal Adaptor, MAPK And MTOR Activator 1	Protein Coding	40	GC11M072085	0.902811	https://www.genecards.org/cgi-bin/carddisp.pl?gene=LAMTOR1
TUSC2	Tumor Suppressor 2, Mitochondrial Calcium Regulator	Protein Coding	39	GC03M051751	0.902811	https://www.genecards.org/cgi-bin/carddisp.pl?gene=TUSC2
FAM215A	Family With Sequence Similarity 215 Member A	RNA Gene	28	GC17P043917	0.902811	https://www.genecards.org/cgi-bin/carddisp.pl?gene=FAM215A
CBR3-AS1	CBR3 Antisense RNA 1	RNA Gene	21	GC21M036090	0.902811	https://www.genecards.org/cgi-bin/carddisp.pl?gene=CBR3-AS1
MIR124-2	MicroRNA 124-2	RNA Gene	21	GC08P064379	0.902811	https://www.genecards.org/cgi-bin/carddisp.pl?gene=MIR124-2
MIR129-2	MicroRNA 129-2	RNA Gene	21	GC11P043805	0.902811	https://www.genecards.org/cgi-bin/carddisp.pl?gene=MIR129-2
MIR202	MicroRNA 202	RNA Gene	21	GC10M133247	0.902811	https://www.genecards.org/cgi-bin/carddisp.pl?gene=MIR202
MIR493	MicroRNA 493	RNA Gene	21	GC14P110926	0.902811	https://www.genecards.org/cgi-bin/carddisp.pl?gene=MIR493
MIR98	MicroRNA 98	RNA Gene	21	GC0XM053646	0.902811	https://www.genecards.org/cgi-bin/carddisp.pl?gene=MIR98
MSC-AS1	MSC Antisense RNA 1	RNA Gene	18	GC08P071828	0.902811	https://www.genecards.org/cgi-bin/carddisp.pl?gene=MSC-AS1
LINC00683	Long Intergenic Non-Protein Coding RNA 683	RNA Gene	17	GC18P076543	0.902811	https://www.genecards.org/cgi-bin/carddisp.pl?gene=LINC00683
MIR1182	MicroRNA 1182	RNA Gene	15	GC01M231019	0.902811	https://www.genecards.org/cgi-bin/carddisp.pl?gene=MIR1182
MIR603	MicroRNA 603	RNA Gene	15	GC10P024275	0.902811	https://www.genecards.org/cgi-bin/carddisp.pl?gene=MIR603
MIR892B	MicroRNA 892b	RNA Gene	14	GC0XM146093	0.902811	https://www.genecards.org/cgi-bin/carddisp.pl?gene=MIR892B
LOC108021846	SOX9 Promoter Region	Functional Element	4	GC17P072120	0.902811	https://www.genecards.org/cgi-bin/carddisp.pl?gene=LOC108021846
HDAC6	Histone Deacetylase 6	Protein Coding	61	GC0XP048801	0.870748	https://www.genecards.org/cgi-bin/carddisp.pl?gene=HDAC6
IDH1	Isocitrate Dehydrogenase (NADP(+)) 1	Protein Coding	60	GC02M208236	0.870748	https://www.genecards.org/cgi-bin/carddisp.pl?gene=IDH1
CD55	CD55 Molecule (Cromer Blood Group)	Protein Coding	56	GC01P207321	0.870748	https://www.genecards.org/cgi-bin/carddisp.pl?gene=CD55
ITGA6	Integrin Subunit Alpha 6	Protein Coding	56	GC02P172427	0.870748	https://www.genecards.org/cgi-bin/carddisp.pl?gene=ITGA6
ALDH1A2	Aldehyde Dehydrogenase 1 Family Member A2	Protein Coding	55	GC15M121963	0.870748	https://www.genecards.org/cgi-bin/carddisp.pl?gene=ALDH1A2
ALDOA	Aldolase, Fructose-Bisphosphate A	Protein Coding	55	GC16P030064	0.870748	https://www.genecards.org/cgi-bin/carddisp.pl?gene=ALDOA
HPRT1	Hypoxanthine Phosphoribosyltransferase 1	Protein Coding	55	GC0XP134460	0.870748	https://www.genecards.org/cgi-bin/carddisp.pl?gene=HPRT1
HSPA5	Heat Shock Protein Family A (Hsp70) Member 5	Protein Coding	55	GC09M125234	0.870748	https://www.genecards.org/cgi-bin/carddisp.pl?gene=HSPA5
RRM2	Ribonucleotide Reductase Regulatory Subunit M2	Protein Coding	55	GC02P010123	0.870748	https://www.genecards.org/cgi-bin/carddisp.pl?gene=RRM2
TBP	TATA-Box Binding Protein	Protein Coding	55	GC06P170554	0.870748	https://www.genecards.org/cgi-bin/carddisp.pl?gene=TBP
CUL3	Cullin 3	Protein Coding	54	GC02M224470	0.870748	https://www.genecards.org/cgi-bin/carddisp.pl?gene=CUL3
HSPA9	Heat Shock Protein Family A (Hsp70) Member 9	Protein Coding	54	GC05M138554	0.870748	https://www.genecards.org/cgi-bin/carddisp.pl?gene=HSPA9
MAPK11	Mitogen-Activated Protein Kinase 11	Protein Coding	54	GC22M050263	0.870748	https://www.genecards.org/cgi-bin/carddisp.pl?gene=MAPK11
TNFRSF11A	TNF Receptor Superfamily Member 11a	Protein Coding	54	GC18P062325	0.870748	https://www.genecards.org/cgi-bin/carddisp.pl?gene=TNFRSF11A
CD59	CD59 Molecule (CD59 Blood Group)	Protein Coding	53	GC11M033704	0.870748	https://www.genecards.org/cgi-bin/carddisp.pl?gene=CD59
CYP27A1	Cytochrome P450 Family 27 Subfamily A Member 1	Protein Coding	53	GC02P218781	0.870748	https://www.genecards.org/cgi-bin/carddisp.pl?gene=CYP27A1
CD34	CD34 Molecule	Protein Coding	52	GC01M207880	0.870748	https://www.genecards.org/cgi-bin/carddisp.pl?gene=CD34
HINT1	Histidine Triad Nucleotide Binding Protein 1	Protein Coding	52	GC05M131159	0.870748	https://www.genecards.org/cgi-bin/carddisp.pl?gene=HINT1
IL23R	Interleukin 23 Receptor	Protein Coding	52	GC01P067138	0.870748	https://www.genecards.org/cgi-bin/carddisp.pl?gene=IL23R
KDM5B	Lysine Demethylase 5B	Protein Coding	52	GC01M202696	0.870748	https://www.genecards.org/cgi-bin/carddisp.pl?gene=KDM5B
KDM6B	Lysine Demethylase 6B	Protein Coding	52	GC17P007834	0.870748	https://www.genecards.org/cgi-bin/carddisp.pl?gene=KDM6B
PEPD	Peptidase D	Protein Coding	52	GC19M033386	0.870748	https://www.genecards.org/cgi-bin/carddisp.pl?gene=PEPD
PPARD	Peroxisome Proliferator Activated Receptor Delta	Protein Coding	52	GC06P092273	0.870748	https://www.genecards.org/cgi-bin/carddisp.pl?gene=PPARD
PPP5C	Protein Phosphatase 5 Catalytic Subunit	Protein Coding	52	GC19P073092	0.870748	https://www.genecards.org/cgi-bin/carddisp.pl?gene=PPP5C
CD163	CD163 Molecule	Protein Coding	51	GC12M008027	0.870748	https://www.genecards.org/cgi-bin/carddisp.pl?gene=CD163
CD47	CD47 Molecule	Protein Coding	51	GC03M108043	0.870748	https://www.genecards.org/cgi-bin/carddisp.pl?gene=CD47
CRY1	Cryptochrome Circadian Regulator 1	Protein Coding	51	GC12M106991	0.870748	https://www.genecards.org/cgi-bin/carddisp.pl?gene=CRY1
PRSS1	Serine Protease 1	Protein Coding	51	GC07P149953	0.870748	https://www.genecards.org/cgi-bin/carddisp.pl?gene=PRSS1
RAPGEF3	Rap Guanine Nucleotide Exchange Factor 3	Protein Coding	51	GC12M047736	0.870748	https://www.genecards.org/cgi-bin/carddisp.pl?gene=RAPGEF3
SENP1	SUMO Specific Peptidase 1	Protein Coding	51	GC12M048042	0.870748	https://www.genecards.org/cgi-bin/carddisp.pl?gene=SENP1
USP13	Ubiquitin Specific Peptidase 13	Protein Coding	51	GC03P179652	0.870748	https://www.genecards.org/cgi-bin/carddisp.pl?gene=USP13
ALAS1	5'-Aminolevulinate Synthase 1	Protein Coding	50	GC03P052198	0.870748	https://www.genecards.org/cgi-bin/carddisp.pl?gene=ALAS1
CFHR1	Complement Factor H Related 1	Protein Coding	50	GC01P196822	0.870748	https://www.genecards.org/cgi-bin/carddisp.pl?gene=CFHR1
FGF4	Fibroblast Growth Factor 4	Protein Coding	50	GC11M099886	0.870748	https://www.genecards.org/cgi-bin/carddisp.pl?gene=FGF4
PODXL	Podocalyxin Like	Protein Coding	50	GC07M131500	0.870748	https://www.genecards.org/cgi-bin/carddisp.pl?gene=PODXL
PRSS3	Serine Protease 3	Protein Coding	50	GC09P033750	0.870748	https://www.genecards.org/cgi-bin/carddisp.pl?gene=PRSS3
SRD5A1	Steroid 5 Alpha-Reductase 1	Protein Coding	50	GC05P006633	0.870748	https://www.genecards.org/cgi-bin/carddisp.pl?gene=SRD5A1
ST3GAL1	ST3 Beta-Galactoside Alpha-2,3-Sialyltransferase 1	Protein Coding	50	GC08M133454	0.870748	https://www.genecards.org/cgi-bin/carddisp.pl?gene=ST3GAL1
UAP1	UDP-N-Acetylglucosamine Pyrophosphorylase 1	Protein Coding	50	GC01P162561	0.870748	https://www.genecards.org/cgi-bin/carddisp.pl?gene=UAP1
SLC14A2	Solute Carrier Family 14 Member 2	Protein Coding	49	GC18P045167	0.870748	https://www.genecards.org/cgi-bin/carddisp.pl?gene=SLC14A2
UTS2R	Urotensin 2 Receptor	Protein Coding	49	GC17P082374	0.870748	https://www.genecards.org/cgi-bin/carddisp.pl?gene=UTS2R
CDH12	Cadherin 12	Protein Coding	48	GC05M021786	0.870748	https://www.genecards.org/cgi-bin/carddisp.pl?gene=CDH12
MCF2L	MCF.2 Cell Line Derived Transforming Sequence Like	Protein Coding	48	GC13P112894	0.870748	https://www.genecards.org/cgi-bin/carddisp.pl?gene=MCF2L
NBEA	Neurobeachin	Protein Coding	48	GC13P034942	0.870748	https://www.genecards.org/cgi-bin/carddisp.pl?gene=NBEA
NUCB2	Nucleobindin 2	Protein Coding	48	GC11P017457	0.870748	https://www.genecards.org/cgi-bin/carddisp.pl?gene=NUCB2
STAG1	Stromal Antigen 1	Protein Coding	48	GC03M136336	0.870748	https://www.genecards.org/cgi-bin/carddisp.pl?gene=STAG1
BBC3	BCL2 Binding Component 3	Protein Coding	47	GC19M047220	0.870748	https://www.genecards.org/cgi-bin/carddisp.pl?gene=BBC3
CCN3	Cellular Communication Network Factor 3	Protein Coding	47	GC08P119416	0.870748	https://www.genecards.org/cgi-bin/carddisp.pl?gene=CCN3
CEP55	Centrosomal Protein 55	Protein Coding	47	GC10P093496	0.870748	https://www.genecards.org/cgi-bin/carddisp.pl?gene=CEP55
HSPA1B	Heat Shock Protein Family A (Hsp70) Member 1B	Protein Coding	47	GC06P092170	0.870748	https://www.genecards.org/cgi-bin/carddisp.pl?gene=HSPA1B
LSP1	Lymphocyte Specific Protein 1	Protein Coding	47	GC11P002155	0.870748	https://www.genecards.org/cgi-bin/carddisp.pl?gene=LSP1
TPBG	Trophoblast Glycoprotein	Protein Coding	47	GC06P092718	0.870748	https://www.genecards.org/cgi-bin/carddisp.pl?gene=TPBG
CDKAL1	CDK5 Regulatory Subunit Associated Protein 1 Like 1	Protein Coding	46	GC06P020534	0.870748	https://www.genecards.org/cgi-bin/carddisp.pl?gene=CDKAL1
COTL1	Coactosin Like F-Actin Binding Protein 1	Protein Coding	46	GC16M084566	0.870748	https://www.genecards.org/cgi-bin/carddisp.pl?gene=COTL1
DUSP2	Dual Specificity Phosphatase 2	Protein Coding	46	GC02M098753	0.870748	https://www.genecards.org/cgi-bin/carddisp.pl?gene=DUSP2
GOLM1	Golgi Membrane Protein 1	Protein Coding	46	GC09M086026	0.870748	https://www.genecards.org/cgi-bin/carddisp.pl?gene=GOLM1
PAG1	Phosphoprotein Membrane Anchor With Glycosphingolipid Microdomains 1	Protein Coding	46	GC08M080967	0.870748	https://www.genecards.org/cgi-bin/carddisp.pl?gene=PAG1
PCDH7	Protocadherin 7	Protein Coding	46	GC04P030722	0.870748	https://www.genecards.org/cgi-bin/carddisp.pl?gene=PCDH7
SGSM3	Small G Protein Signaling Modulator 3	Protein Coding	46	GC22P040370	0.870748	https://www.genecards.org/cgi-bin/carddisp.pl?gene=SGSM3
DDX39A	DExD-Box Helicase 39A	Protein Coding	45	GC19M014408	0.870748	https://www.genecards.org/cgi-bin/carddisp.pl?gene=DDX39A
DDX31	DEAD-Box Helicase 31	Protein Coding	44	GC09M132594	0.870748	https://www.genecards.org/cgi-bin/carddisp.pl?gene=DDX31
MMP28	Matrix Metallopeptidase 28	Protein Coding	44	GC17M035756	0.870748	https://www.genecards.org/cgi-bin/carddisp.pl?gene=MMP28
MYCL	MYCL Proto-Oncogene, BHLH Transcription Factor	Protein Coding	44	GC01M039895	0.870748	https://www.genecards.org/cgi-bin/carddisp.pl?gene=MYCL
RBM5	RNA Binding Motif Protein 5	Protein Coding	44	GC03P050437	0.870748	https://www.genecards.org/cgi-bin/carddisp.pl?gene=RBM5
SLC39A11	Solute Carrier Family 39 Member 11	Protein Coding	44	GC17M072645	0.870748	https://www.genecards.org/cgi-bin/carddisp.pl?gene=SLC39A11
ATG2B	Autophagy Related 2B	Protein Coding	43	GC14M103138	0.870748	https://www.genecards.org/cgi-bin/carddisp.pl?gene=ATG2B
NANOG	Nanog Homeobox	Protein Coding	43	GC12P007787	0.870748	https://www.genecards.org/cgi-bin/carddisp.pl?gene=NANOG
SETD6	SET Domain Containing 6, Protein Lysine Methyltransferase	Protein Coding	43	GC16P058514	0.870748	https://www.genecards.org/cgi-bin/carddisp.pl?gene=SETD6
PROM2	Prominin 2	Protein Coding	42	GC02P095274	0.870748	https://www.genecards.org/cgi-bin/carddisp.pl?gene=PROM2
NKX2-8	NK2 Homeobox 8	Protein Coding	41	GC14M036580	0.870748	https://www.genecards.org/cgi-bin/carddisp.pl?gene=NKX2-8
PSG2	Pregnancy Specific Beta-1-Glycoprotein 2	Protein Coding	40	GC19M043064	0.870748	https://www.genecards.org/cgi-bin/carddisp.pl?gene=PSG2
ACTRT3	Actin Related Protein T3	Protein Coding	39	GC03M169766	0.870748	https://www.genecards.org/cgi-bin/carddisp.pl?gene=ACTRT3
DMTF1	Cyclin D Binding Myb Like Transcription Factor 1	Protein Coding	39	GC07P087155	0.870748	https://www.genecards.org/cgi-bin/carddisp.pl?gene=DMTF1
LRRC34	Leucine Rich Repeat Containing 34	Protein Coding	39	GC03M169793	0.870748	https://www.genecards.org/cgi-bin/carddisp.pl?gene=LRRC34
SOCS7	Suppressor Of Cytokine Signaling 7	Protein Coding	39	GC17P061801	0.870748	https://www.genecards.org/cgi-bin/carddisp.pl?gene=SOCS7
CASC2	Cancer Susceptibility 2	RNA Gene	29	GC10P118046	0.870748	https://www.genecards.org/cgi-bin/carddisp.pl?gene=CASC2
BAGE	B Melanoma Antigen	Protein Coding	22	GC21U900396	0.870748	https://www.genecards.org/cgi-bin/carddisp.pl?gene=BAGE
MIR181C	MicroRNA 181c	RNA Gene	22	GC19P014857	0.870748	https://www.genecards.org/cgi-bin/carddisp.pl?gene=MIR181C
LINC02871	Long Intergenic Non-Protein Coding RNA 2871	RNA Gene	21	GC20P010997	0.870748	https://www.genecards.org/cgi-bin/carddisp.pl?gene=LINC02871
MIR449C	MicroRNA 449c	RNA Gene	19	GC05M055173	0.870748	https://www.genecards.org/cgi-bin/carddisp.pl?gene=MIR449C
LINC00858	Long Intergenic Non-Protein Coding RNA 858	RNA Gene	17	GC10P094495	0.870748	https://www.genecards.org/cgi-bin/carddisp.pl?gene=LINC00858
MIR3064	MicroRNA 3064	RNA Gene	15	GC17M064500	0.870748	https://www.genecards.org/cgi-bin/carddisp.pl?gene=MIR3064
MIR3682	MicroRNA 3682	RNA Gene	15	GC02M053849	0.870748	https://www.genecards.org/cgi-bin/carddisp.pl?gene=MIR3682
LINC01833	Long Intergenic Non-Protein Coding RNA 1833	RNA Gene	14	GC02M044921	0.870748	https://www.genecards.org/cgi-bin/carddisp.pl?gene=LINC01833
MIR4735	MicroRNA 4735	RNA Gene	13	GC01M196555	0.870748	https://www.genecards.org/cgi-bin/carddisp.pl?gene=MIR4735
LSINCT5	Long Stress-Induced Non-Coding Transcript 5	RNA Gene	11	GC05P002712	0.870748	https://www.genecards.org/cgi-bin/carddisp.pl?gene=LSINCT5
LOC339593	Uncharacterized LOC339593	RNA Gene	10	GC20M011242	0.870748	https://www.genecards.org/cgi-bin/carddisp.pl?gene=LOC339593
SFRP4	Secreted Frizzled Related Protein 4	Protein Coding	51	GC07M037912	0.847261	https://www.genecards.org/cgi-bin/carddisp.pl?gene=SFRP4
NSUN2	NOP2/Sun RNA Methyltransferase 2	Protein Coding	50	GC05M006599	0.847261	https://www.genecards.org/cgi-bin/carddisp.pl?gene=NSUN2
FUBP3	Far Upstream Element Binding Protein 3	Protein Coding	44	GC09P130580	0.847261	https://www.genecards.org/cgi-bin/carddisp.pl?gene=FUBP3
LACC1	Laccase Domain Containing 1	Protein Coding	42	GC13P043879	0.847261	https://www.genecards.org/cgi-bin/carddisp.pl?gene=LACC1
NTRK2	Neurotrophic Receptor Tyrosine Kinase 2	Protein Coding	60	GC09P084668	0.834355	https://www.genecards.org/cgi-bin/carddisp.pl?gene=NTRK2
MERTK	MER Proto-Oncogene, Tyrosine Kinase	Protein Coding	59	GC02P111898	0.834355	https://www.genecards.org/cgi-bin/carddisp.pl?gene=MERTK
DNMT3A	DNA Methyltransferase 3 Alpha	Protein Coding	57	GC02M025228	0.834355	https://www.genecards.org/cgi-bin/carddisp.pl?gene=DNMT3A
HDAC1	Histone Deacetylase 1	Protein Coding	57	GC01P032292	0.834355	https://www.genecards.org/cgi-bin/carddisp.pl?gene=HDAC1
KAT5	Lysine Acetyltransferase 5	Protein Coding	57	GC11P065711	0.834355	https://www.genecards.org/cgi-bin/carddisp.pl?gene=KAT5
NFKBIA	NFKB Inhibitor Alpha	Protein Coding	57	GC14M035401	0.834355	https://www.genecards.org/cgi-bin/carddisp.pl?gene=NFKBIA
ACTB	Actin Beta	Protein Coding	56	GC07M005527	0.834355	https://www.genecards.org/cgi-bin/carddisp.pl?gene=ACTB
CASP7	Caspase 7	Protein Coding	56	GC10P113679	0.834355	https://www.genecards.org/cgi-bin/carddisp.pl?gene=CASP7
GDNF	Glial Cell Derived Neurotrophic Factor	Protein Coding	56	GC05M037812	0.834355	https://www.genecards.org/cgi-bin/carddisp.pl?gene=GDNF
ITGA5	Integrin Subunit Alpha 5	Protein Coding	56	GC12M055005	0.834355	https://www.genecards.org/cgi-bin/carddisp.pl?gene=ITGA5
SERPINC1	Serpin Family C Member 1	Protein Coding	56	GC01M174653	0.834355	https://www.genecards.org/cgi-bin/carddisp.pl?gene=SERPINC1
TYRO3	TYRO3 Protein Tyrosine Kinase	Protein Coding	56	GC15P041557	0.834355	https://www.genecards.org/cgi-bin/carddisp.pl?gene=TYRO3
ANXA2	Annexin A2	Protein Coding	55	GC15M060347	0.834355	https://www.genecards.org/cgi-bin/carddisp.pl?gene=ANXA2
CSNK1D	Casein Kinase 1 Delta	Protein Coding	55	GC17M082239	0.834355	https://www.genecards.org/cgi-bin/carddisp.pl?gene=CSNK1D
EIF2AK3	Eukaryotic Translation Initiation Factor 2 Alpha Kinase 3	Protein Coding	55	GC02M088556	0.834355	https://www.genecards.org/cgi-bin/carddisp.pl?gene=EIF2AK3
LEF1	Lymphoid Enhancer Binding Factor 1	Protein Coding	55	GC04M108047	0.834355	https://www.genecards.org/cgi-bin/carddisp.pl?gene=LEF1
MAP3K5	Mitogen-Activated Protein Kinase Kinase Kinase 5	Protein Coding	55	GC06M136557	0.834355	https://www.genecards.org/cgi-bin/carddisp.pl?gene=MAP3K5
PRKCB	Protein Kinase C Beta	Protein Coding	55	GC16P024574	0.834355	https://www.genecards.org/cgi-bin/carddisp.pl?gene=PRKCB
SLCO1B1	Solute Carrier Organic Anion Transporter Family Member 1B1	Protein Coding	55	GC12P023907	0.834355	https://www.genecards.org/cgi-bin/carddisp.pl?gene=SLCO1B1
F8	Coagulation Factor VIII	Protein Coding	54	GC0XM154835	0.834355	https://www.genecards.org/cgi-bin/carddisp.pl?gene=F8
FBLN5	Fibulin 5	Protein Coding	54	GC14M091869	0.834355	https://www.genecards.org/cgi-bin/carddisp.pl?gene=FBLN5
PAX6	Paired Box 6	Protein Coding	54	GC11M031784	0.834355	https://www.genecards.org/cgi-bin/carddisp.pl?gene=PAX6
PGD	Phosphogluconate Dehydrogenase	Protein Coding	54	GC01P010398	0.834355	https://www.genecards.org/cgi-bin/carddisp.pl?gene=PGD
TNFRSF11B	TNF Receptor Superfamily Member 11b	Protein Coding	54	GC08M118923	0.834355	https://www.genecards.org/cgi-bin/carddisp.pl?gene=TNFRSF11B
ACLY	ATP Citrate Lyase	Protein Coding	53	GC17M041866	0.834355	https://www.genecards.org/cgi-bin/carddisp.pl?gene=ACLY
B4GALT1	Beta-1,4-Galactosyltransferase 1	Protein Coding	53	GC09M033100	0.834355	https://www.genecards.org/cgi-bin/carddisp.pl?gene=B4GALT1
CASP2	Caspase 2	Protein Coding	53	GC07P149988	0.834355	https://www.genecards.org/cgi-bin/carddisp.pl?gene=CASP2
CDH11	Cadherin 11	Protein Coding	53	GC16M064943	0.834355	https://www.genecards.org/cgi-bin/carddisp.pl?gene=CDH11
CRYAB	Crystallin Alpha B	Protein Coding	53	GC11M111908	0.834355	https://www.genecards.org/cgi-bin/carddisp.pl?gene=CRYAB
ERN1	Endoplasmic Reticulum To Nucleus Signaling 1	Protein Coding	53	GC17M064039	0.834355	https://www.genecards.org/cgi-bin/carddisp.pl?gene=ERN1
HSPA1A	Heat Shock Protein Family A (Hsp70) Member 1A	Protein Coding	53	GC06P092171	0.834355	https://www.genecards.org/cgi-bin/carddisp.pl?gene=HSPA1A
PINK1	PTEN Induced Kinase 1	Protein Coding	53	GC01P020634	0.834355	https://www.genecards.org/cgi-bin/carddisp.pl?gene=PINK1
PLCG1	Phospholipase C Gamma 1	Protein Coding	53	GC20P041136	0.834355	https://www.genecards.org/cgi-bin/carddisp.pl?gene=PLCG1
TCF7L2	Transcription Factor 7 Like 2	Protein Coding	53	GC10P112950	0.834355	https://www.genecards.org/cgi-bin/carddisp.pl?gene=TCF7L2
ADORA3	Adenosine A3 Receptor	Protein Coding	52	GC01M111499	0.834355	https://www.genecards.org/cgi-bin/carddisp.pl?gene=ADORA3
COL6A3	Collagen Type VI Alpha 3 Chain	Protein Coding	52	GC02M237324	0.834355	https://www.genecards.org/cgi-bin/carddisp.pl?gene=COL6A3
HNRNPA2B1	Heterogeneous Nuclear Ribonucleoprotein A2/B1	Protein Coding	52	GC07M026174	0.834355	https://www.genecards.org/cgi-bin/carddisp.pl?gene=HNRNPA2B1
MYH10	Myosin Heavy Chain 10	Protein Coding	52	GC17M008474	0.834355	https://www.genecards.org/cgi-bin/carddisp.pl?gene=MYH10
S1PR1	Sphingosine-1-Phosphate Receptor 1	Protein Coding	52	GC01P101236	0.834355	https://www.genecards.org/cgi-bin/carddisp.pl?gene=S1PR1
STIP1	Stress Induced Phosphoprotein 1	Protein Coding	52	GC11P064445	0.834355	https://www.genecards.org/cgi-bin/carddisp.pl?gene=STIP1
TXN	Thioredoxin	Protein Coding	52	GC09M110243	0.834355	https://www.genecards.org/cgi-bin/carddisp.pl?gene=TXN
WNT1	Wnt Family Member 1	Protein Coding	52	GC12P049566	0.834355	https://www.genecards.org/cgi-bin/carddisp.pl?gene=WNT1
ARRB1	Arrestin Beta 1	Protein Coding	51	GC11M100029	0.834355	https://www.genecards.org/cgi-bin/carddisp.pl?gene=ARRB1
ARRB2	Arrestin Beta 2	Protein Coding	51	GC17P004711	0.834355	https://www.genecards.org/cgi-bin/carddisp.pl?gene=ARRB2
CS	Citrate Synthase	Protein Coding	51	GC12M056271	0.834355	https://www.genecards.org/cgi-bin/carddisp.pl?gene=CS
CXCR3	C-X-C Motif Chemokine Receptor 3	Protein Coding	51	GC0XM071615	0.834355	https://www.genecards.org/cgi-bin/carddisp.pl?gene=CXCR3
EOMES	Eomesodermin	Protein Coding	51	GC03M027715	0.834355	https://www.genecards.org/cgi-bin/carddisp.pl?gene=EOMES
GPD1	Glycerol-3-Phosphate Dehydrogenase 1	Protein Coding	51	GC12P050126	0.834355	https://www.genecards.org/cgi-bin/carddisp.pl?gene=GPD1
HSPA1L	Heat Shock Protein Family A (Hsp70) Member 1 Like	Protein Coding	51	GC06M031809	0.834355	https://www.genecards.org/cgi-bin/carddisp.pl?gene=HSPA1L
HSPA6	Heat Shock Protein Family A (Hsp70) Member 6	Protein Coding	51	GC01P161524	0.834355	https://www.genecards.org/cgi-bin/carddisp.pl?gene=HSPA6
HYAL2	Hyaluronidase 2	Protein Coding	51	GC03M050317	0.834355	https://www.genecards.org/cgi-bin/carddisp.pl?gene=HYAL2
NTF3	Neurotrophin 3	Protein Coding	51	GC12P023503	0.834355	https://www.genecards.org/cgi-bin/carddisp.pl?gene=NTF3
PPAT	Phosphoribosyl Pyrophosphate Amidotransferase	Protein Coding	51	GC04M056393	0.834355	https://www.genecards.org/cgi-bin/carddisp.pl?gene=PPAT
PTPN13	Protein Tyrosine Phosphatase Non-Receptor Type 13	Protein Coding	51	GC04P086594	0.834355	https://www.genecards.org/cgi-bin/carddisp.pl?gene=PTPN13
RORC	RAR Related Orphan Receptor C	Protein Coding	51	GC01M151806	0.834355	https://www.genecards.org/cgi-bin/carddisp.pl?gene=RORC
S100B	S100 Calcium Binding Protein B	Protein Coding	51	GC21M051379	0.834355	https://www.genecards.org/cgi-bin/carddisp.pl?gene=S100B
SDC4	Syndecan 4	Protein Coding	51	GC20M045325	0.834355	https://www.genecards.org/cgi-bin/carddisp.pl?gene=SDC4
SLCO1B3	Solute Carrier Organic Anion Transporter Family Member 1B3	Protein Coding	51	GC12P020810	0.834355	https://www.genecards.org/cgi-bin/carddisp.pl?gene=SLCO1B3
SLCO2B1	Solute Carrier Organic Anion Transporter Family Member 2B1	Protein Coding	51	GC11P078457	0.834355	https://www.genecards.org/cgi-bin/carddisp.pl?gene=SLCO2B1
TRAF2	TNF Receptor Associated Factor 2	Protein Coding	51	GC09P136881	0.834355	https://www.genecards.org/cgi-bin/carddisp.pl?gene=TRAF2
TXNRD1	Thioredoxin Reductase 1	Protein Coding	51	GC12P104215	0.834355	https://www.genecards.org/cgi-bin/carddisp.pl?gene=TXNRD1
UGT1A9	UDP Glucuronosyltransferase Family 1 Member A9	Protein Coding	51	GC02P233671	0.834355	https://www.genecards.org/cgi-bin/carddisp.pl?gene=UGT1A9
CASP5	Caspase 5	Protein Coding	50	GC11M104995	0.834355	https://www.genecards.org/cgi-bin/carddisp.pl?gene=CASP5
KRT10	Keratin 10	Protein Coding	50	GC17M040818	0.834355	https://www.genecards.org/cgi-bin/carddisp.pl?gene=KRT10
KRT13	Keratin 13	Protein Coding	50	GC17M041500	0.834355	https://www.genecards.org/cgi-bin/carddisp.pl?gene=KRT13
KRT16	Keratin 16	Protein Coding	50	GC17M041609	0.834355	https://www.genecards.org/cgi-bin/carddisp.pl?gene=KRT16
LETM1	Leucine Zipper And EF-Hand Containing Transmembrane Protein 1	Protein Coding	50	GC04M001811	0.834355	https://www.genecards.org/cgi-bin/carddisp.pl?gene=LETM1
PAICS	Phosphoribosylaminoimidazole Carboxylase And Phosphoribosylaminoimidazolesuccinocarboxamide Synthase	Protein Coding	50	GC04P056410	0.834355	https://www.genecards.org/cgi-bin/carddisp.pl?gene=PAICS
PON2	Paraoxonase 2	Protein Coding	50	GC07M095404	0.834355	https://www.genecards.org/cgi-bin/carddisp.pl?gene=PON2
RBBP8	RB Binding Protein 8, Endonuclease	Protein Coding	50	GC18P022798	0.834355	https://www.genecards.org/cgi-bin/carddisp.pl?gene=RBBP8
SLC28A1	Solute Carrier Family 28 Member 1	Protein Coding	50	GC15P084884	0.834355	https://www.genecards.org/cgi-bin/carddisp.pl?gene=SLC28A1
TRIM21	Tripartite Motif Containing 21	Protein Coding	50	GC11M004384	0.834355	https://www.genecards.org/cgi-bin/carddisp.pl?gene=TRIM21
TRIO	Trio Rho Guanine Nucleotide Exchange Factor	Protein Coding	50	GC05P014143	0.834355	https://www.genecards.org/cgi-bin/carddisp.pl?gene=TRIO
VDAC2	Voltage Dependent Anion Channel 2	Protein Coding	50	GC10P075210	0.834355	https://www.genecards.org/cgi-bin/carddisp.pl?gene=VDAC2
CD164	CD164 Molecule	Protein Coding	48	GC06M109366	0.834355	https://www.genecards.org/cgi-bin/carddisp.pl?gene=CD164
CLDN11	Claudin 11	Protein Coding	48	GC03P170418	0.834355	https://www.genecards.org/cgi-bin/carddisp.pl?gene=CLDN11
KRT2	Keratin 2	Protein Coding	48	GC12M052722	0.834355	https://www.genecards.org/cgi-bin/carddisp.pl?gene=KRT2
ORM1	Orosomucoid 1	Protein Coding	48	GC09P114323	0.834355	https://www.genecards.org/cgi-bin/carddisp.pl?gene=ORM1
PKMYT1	Protein Kinase, Membrane Associated Tyrosine/Threonine 1	Protein Coding	48	GC16M008200	0.834355	https://www.genecards.org/cgi-bin/carddisp.pl?gene=PKMYT1
RGS19	Regulator Of G Protein Signaling 19	Protein Coding	48	GC20M064073	0.834355	https://www.genecards.org/cgi-bin/carddisp.pl?gene=RGS19
RNF8	Ring Finger Protein 8	Protein Coding	48	GC06P092305	0.834355	https://www.genecards.org/cgi-bin/carddisp.pl?gene=RNF8
TRPM2	Transient Receptor Potential Cation Channel Subfamily M Member 2	Protein Coding	48	GC21P044350	0.834355	https://www.genecards.org/cgi-bin/carddisp.pl?gene=TRPM2
UNC5C	Unc-5 Netrin Receptor C	Protein Coding	48	GC04M095162	0.834355	https://www.genecards.org/cgi-bin/carddisp.pl?gene=UNC5C
CCNF	Cyclin F	Protein Coding	47	GC16P002429	0.834355	https://www.genecards.org/cgi-bin/carddisp.pl?gene=CCNF
CXCL9	C-X-C Motif Chemokine Ligand 9	Protein Coding	47	GC04M076001	0.834355	https://www.genecards.org/cgi-bin/carddisp.pl?gene=CXCL9
HOMER3	Homer Scaffold Protein 3	Protein Coding	47	GC19M018933	0.834355	https://www.genecards.org/cgi-bin/carddisp.pl?gene=HOMER3
PTPN21	Protein Tyrosine Phosphatase Non-Receptor Type 21	Protein Coding	47	GC14M088465	0.834355	https://www.genecards.org/cgi-bin/carddisp.pl?gene=PTPN21
S100A2	S100 Calcium Binding Protein A2	Protein Coding	47	GC01M153561	0.834355	https://www.genecards.org/cgi-bin/carddisp.pl?gene=S100A2
SOX11	SRY-Box Transcription Factor 11	Protein Coding	47	GC02P005707	0.834355	https://www.genecards.org/cgi-bin/carddisp.pl?gene=SOX11
ETV5	ETS Variant Transcription Factor 5	Protein Coding	46	GC03M186046	0.834355	https://www.genecards.org/cgi-bin/carddisp.pl?gene=ETV5
HTATIP2	HIV-1 Tat Interactive Protein 2	Protein Coding	46	GC11P020363	0.834355	https://www.genecards.org/cgi-bin/carddisp.pl?gene=HTATIP2
PEG10	Paternally Expressed 10	Protein Coding	46	GC07P094656	0.834355	https://www.genecards.org/cgi-bin/carddisp.pl?gene=PEG10
BMP10	Bone Morphogenetic Protein 10	Protein Coding	45	GC02M068865	0.834355	https://www.genecards.org/cgi-bin/carddisp.pl?gene=BMP10
IL32	Interleukin 32	Protein Coding	45	GC16P013549	0.834355	https://www.genecards.org/cgi-bin/carddisp.pl?gene=IL32
CDCA8	Cell Division Cycle Associated 8	Protein Coding	44	GC01P037692	0.834355	https://www.genecards.org/cgi-bin/carddisp.pl?gene=CDCA8
HNRNPA3	Heterogeneous Nuclear Ribonucleoprotein A3	Protein Coding	44	GC02P177212	0.834355	https://www.genecards.org/cgi-bin/carddisp.pl?gene=HNRNPA3
KNSTRN	Kinetochore Localized Astrin (SPAG5) Binding Protein	Protein Coding	44	GC15P040382	0.834355	https://www.genecards.org/cgi-bin/carddisp.pl?gene=KNSTRN
ZKSCAN1	Zinc Finger With KRAB And SCAN Domains 1	Protein Coding	44	GC07P100015	0.834355	https://www.genecards.org/cgi-bin/carddisp.pl?gene=ZKSCAN1
KIF16B	Kinesin Family Member 16B	Protein Coding	43	GC20M016272	0.834355	https://www.genecards.org/cgi-bin/carddisp.pl?gene=KIF16B
NXPH4	Neurexophilin 4	Protein Coding	43	GC12P057600	0.834355	https://www.genecards.org/cgi-bin/carddisp.pl?gene=NXPH4
RASSF6	Ras Association Domain Family Member 6	Protein Coding	43	GC04M073571	0.834355	https://www.genecards.org/cgi-bin/carddisp.pl?gene=RASSF6
RBM3	RNA Binding Motif Protein 3	Protein Coding	43	GC0XP048574	0.834355	https://www.genecards.org/cgi-bin/carddisp.pl?gene=RBM3
C19orf12	Chromosome 19 Open Reading Frame 12	Protein Coding	42	GC19M070406	0.834355	https://www.genecards.org/cgi-bin/carddisp.pl?gene=C19orf12
FOXK1	Forkhead Box K1	Protein Coding	41	GC07P004682	0.834355	https://www.genecards.org/cgi-bin/carddisp.pl?gene=FOXK1
MAGEA11	MAGE Family Member A11	Protein Coding	41	GC0XP149688	0.834355	https://www.genecards.org/cgi-bin/carddisp.pl?gene=MAGEA11
ANXA10	Annexin A10	Protein Coding	40	GC04P168081	0.834355	https://www.genecards.org/cgi-bin/carddisp.pl?gene=ANXA10
IFIT5	Interferon Induced Protein With Tetratricopeptide Repeats 5	Protein Coding	40	GC10P089414	0.834355	https://www.genecards.org/cgi-bin/carddisp.pl?gene=IFIT5
RNASE4	Ribonuclease A Family Member 4	Protein Coding	40	GC14P034391	0.834355	https://www.genecards.org/cgi-bin/carddisp.pl?gene=RNASE4
MAGEA6	MAGE Family Member A6	Protein Coding	39	GC0XM152766	0.834355	https://www.genecards.org/cgi-bin/carddisp.pl?gene=MAGEA6
MITD1	Microtubule Interacting And Trafficking Domain Containing 1	Protein Coding	39	GC02M099152	0.834355	https://www.genecards.org/cgi-bin/carddisp.pl?gene=MITD1
MYCNOS	MYCN Opposite Strand	RNA Gene	30	GC02M015918	0.834355	https://www.genecards.org/cgi-bin/carddisp.pl?gene=MYCNOS
MIR326	MicroRNA 326	RNA Gene	24	GC11M075335	0.834355	https://www.genecards.org/cgi-bin/carddisp.pl?gene=MIR326
SNHG15	Small Nucleolar RNA Host Gene 15	RNA Gene	24	GC07M044983	0.834355	https://www.genecards.org/cgi-bin/carddisp.pl?gene=SNHG15
POLR1HASP	POLR1H Antisense, Pseudogene	Pseudogene	23	GC06M074340	0.834355	https://www.genecards.org/cgi-bin/carddisp.pl?gene=POLR1HASP
MIR136	MicroRNA 136	RNA Gene	22	GC14P110571	0.834355	https://www.genecards.org/cgi-bin/carddisp.pl?gene=MIR136
PTENP1	Phosphatase And Tensin Homolog Pseudogene 1	Pseudogene	22	GC09M033673	0.834355	https://www.genecards.org/cgi-bin/carddisp.pl?gene=PTENP1
SNHG3	Small Nucleolar RNA Host Gene 3	RNA Gene	22	GC01P028886	0.834355	https://www.genecards.org/cgi-bin/carddisp.pl?gene=SNHG3
MIR187	MicroRNA 187	RNA Gene	21	GC18M035904	0.834355	https://www.genecards.org/cgi-bin/carddisp.pl?gene=MIR187
CALML3-AS1	CALML3 Antisense RNA 1	RNA Gene	19	GC10M005506	0.834355	https://www.genecards.org/cgi-bin/carddisp.pl?gene=CALML3-AS1
MIR1178	MicroRNA 1178	RNA Gene	17	GC12M119713	0.834355	https://www.genecards.org/cgi-bin/carddisp.pl?gene=MIR1178
MIR20B	MicroRNA 20b	RNA Gene	17	GC0XM134337	0.834355	https://www.genecards.org/cgi-bin/carddisp.pl?gene=MIR20B
MIR665	MicroRNA 665	RNA Gene	16	GC14P110937	0.834355	https://www.genecards.org/cgi-bin/carddisp.pl?gene=MIR665
MIR1246	MicroRNA 1246	RNA Gene	14	GC02M176600	0.834355	https://www.genecards.org/cgi-bin/carddisp.pl?gene=MIR1246
MIR2909	MicroRNA 2909	RNA Gene	12	GC17P037033	0.834355	https://www.genecards.org/cgi-bin/carddisp.pl?gene=MIR2909
H19-ICR	H19/IGF2 Imprinting Control Region	Functional Element	7	GC11P002168	0.834355	https://www.genecards.org/cgi-bin/carddisp.pl?gene=H19-ICR
NCAM1	Neural Cell Adhesion Molecule 1	Protein Coding	55	GC11P112961	0.812371	https://www.genecards.org/cgi-bin/carddisp.pl?gene=NCAM1
SYP	Synaptophysin	Protein Coding	52	GC0XM049187	0.812371	https://www.genecards.org/cgi-bin/carddisp.pl?gene=SYP
FLT4	Fms Related Receptor Tyrosine Kinase 4	Protein Coding	59	GC05M180644	0.791185	https://www.genecards.org/cgi-bin/carddisp.pl?gene=FLT4
NTRK3	Neurotrophic Receptor Tyrosine Kinase 3	Protein Coding	59	GC15M087859	0.791185	https://www.genecards.org/cgi-bin/carddisp.pl?gene=NTRK3
SNCA	Synuclein Alpha	Protein Coding	59	GC04M089724	0.791185	https://www.genecards.org/cgi-bin/carddisp.pl?gene=SNCA
AIFM1	Apoptosis Inducing Factor Mitochondria Associated 1	Protein Coding	56	GC0XM130129	0.791185	https://www.genecards.org/cgi-bin/carddisp.pl?gene=AIFM1
[truncated: 973 more rows]
